# Supplementary material for: MicroRNA-23b Promotes Avian Leukosis Virus Subgroup J (ALV-J) Replication by Targeting IRF1
Source: PubMed Central journal article supplement (PMC4434839; doi:10.1038/srep10294), 2015-05-18
Supplement: srep10294-s1.pdf [file srep10294-s1.pdf]

# **MicroRNA-23b Promotes Avian Leukosis Virus Subgroup J**

## **(ALV-J) Replication by Targeting *IRF1***

Zhenhui Li<sup>1,2</sup>, Biao Chen<sup>1,2</sup>, Min Feng<sup>1,2</sup>, Hongjia Ouyang<sup>1,2</sup>, Ming Zheng<sup>1,2</sup>, Qiao Ye<sup>1,2</sup>, Qinghua Nie<sup>1,2,\*</sup>, and Xiquan Zhang<sup>1,2</sup>

<sup>1</sup>Department of Animal Genetics, Breeding and Reproduction, College of Animal Science, South China Agricultural University, Guangzhou 510642, Guangdong, China.

<sup>2</sup>Guangdong Provincial Key Lab of Agro-Animal Genomics and Molecular Breeding and Key Lab of Chicken Genetics, Breeding and Reproduction, Ministry of Agriculture, Guangzhou 510642, Guangdong, China.

\*To whom correspondence should be addressed. Tel: 86-20-85285759; Fax: 86-20-85280740; Email: nqinghua@scau.edu.cn.

# Outline of Supplementary Information

## Supplementary Figures.

**Figure S1.** Gene ontology enrichment analysis.

**Figure S2.** PCR detection for ALV-J, exogenous ALVs (A-D), MDV and REV.

**Figure S3.** Full-length blots.

## Supplementary Tables.

**Table S1.** Differential expression analysis of miRNAs in ALV-J infected compared with uninfected chicken spleens using DEG.

**Table S2.** Differential expression analysis of genes in ALV-J infected compared with uninfected chicken spleens using DEG.

**Table S3.** Differentially expressed miRNAs and their corresponding target genes with differential expression in ALV-J infected compared with uninfected chicken spleens.

**Table S4.** Gene ontology (GO) function annotation of the 111 genes was also performed by STRING.

**Table S5.** Primers pairs employed to identify ALVs, MDV and REV.

**Table S6.** Real-time PCR primers for IRF1, gp85, IFN $\beta$  and  $\beta$ -actin.

# Supplementary Figures

## Figure S1 Gene ontology enrichment analysis.

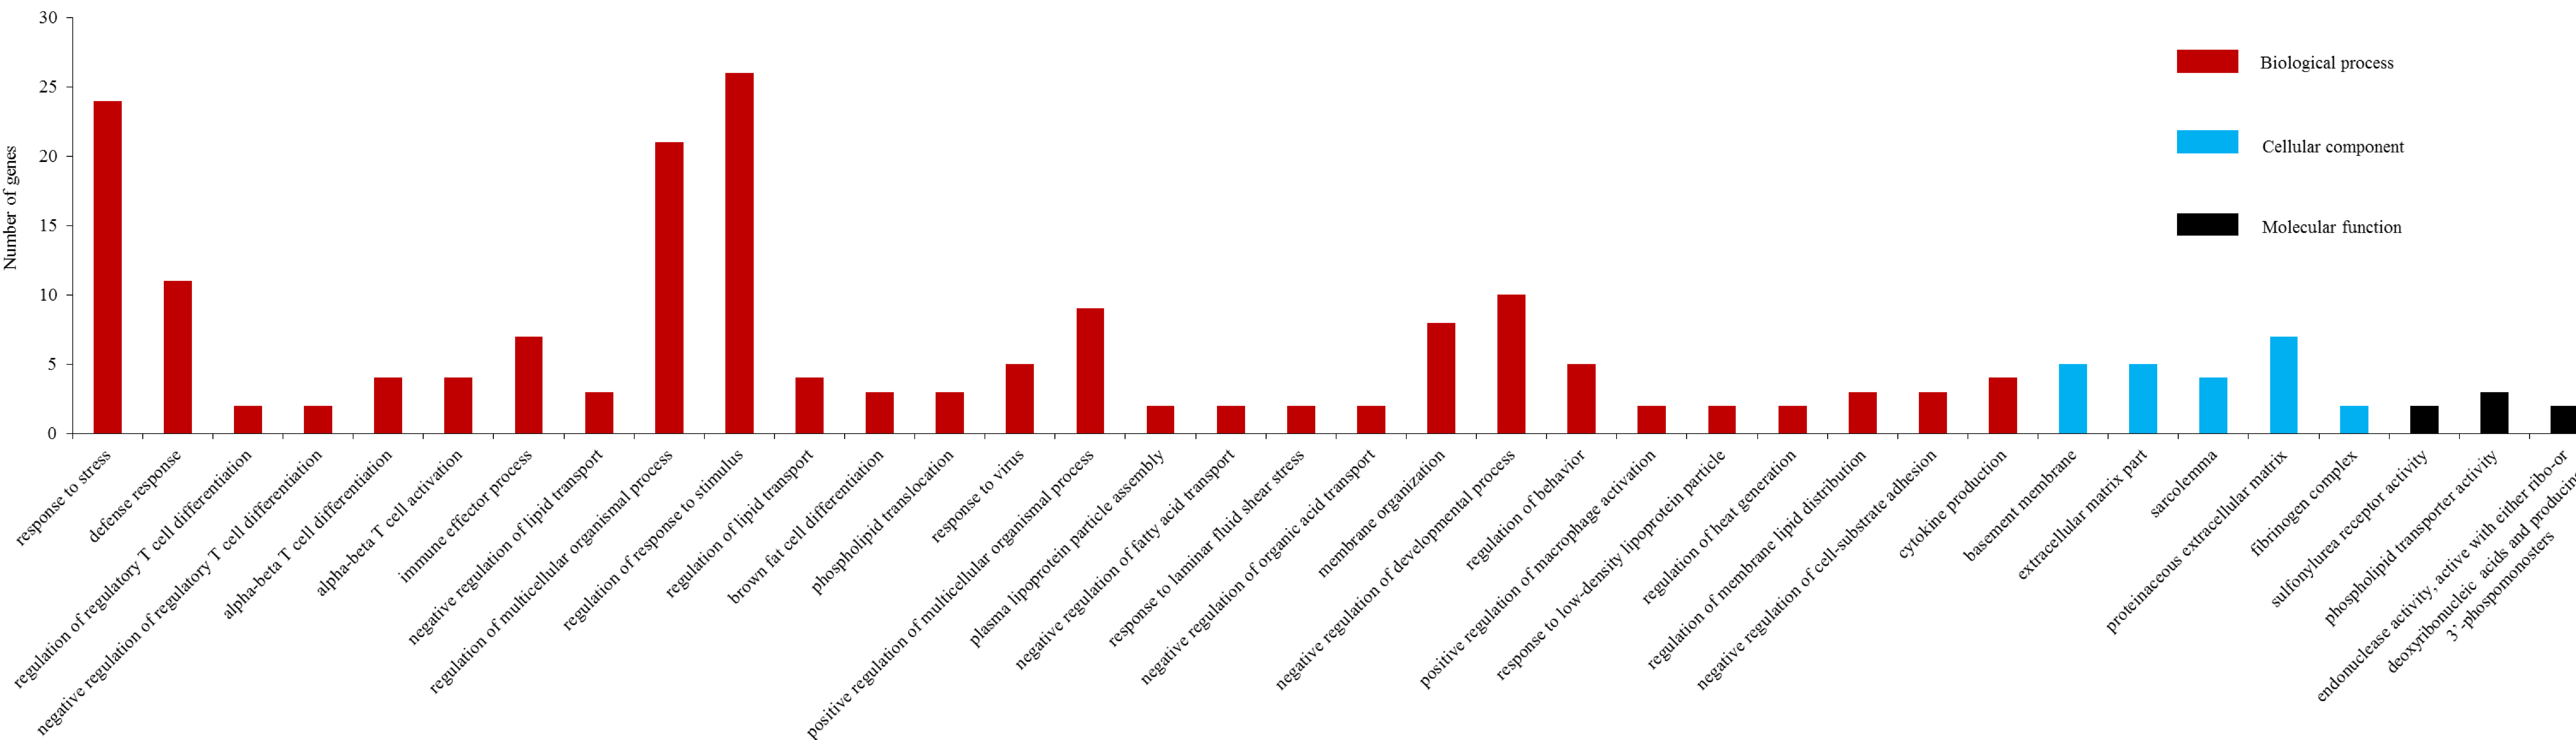

Figure S2 A: ALV-J was detected by PCR

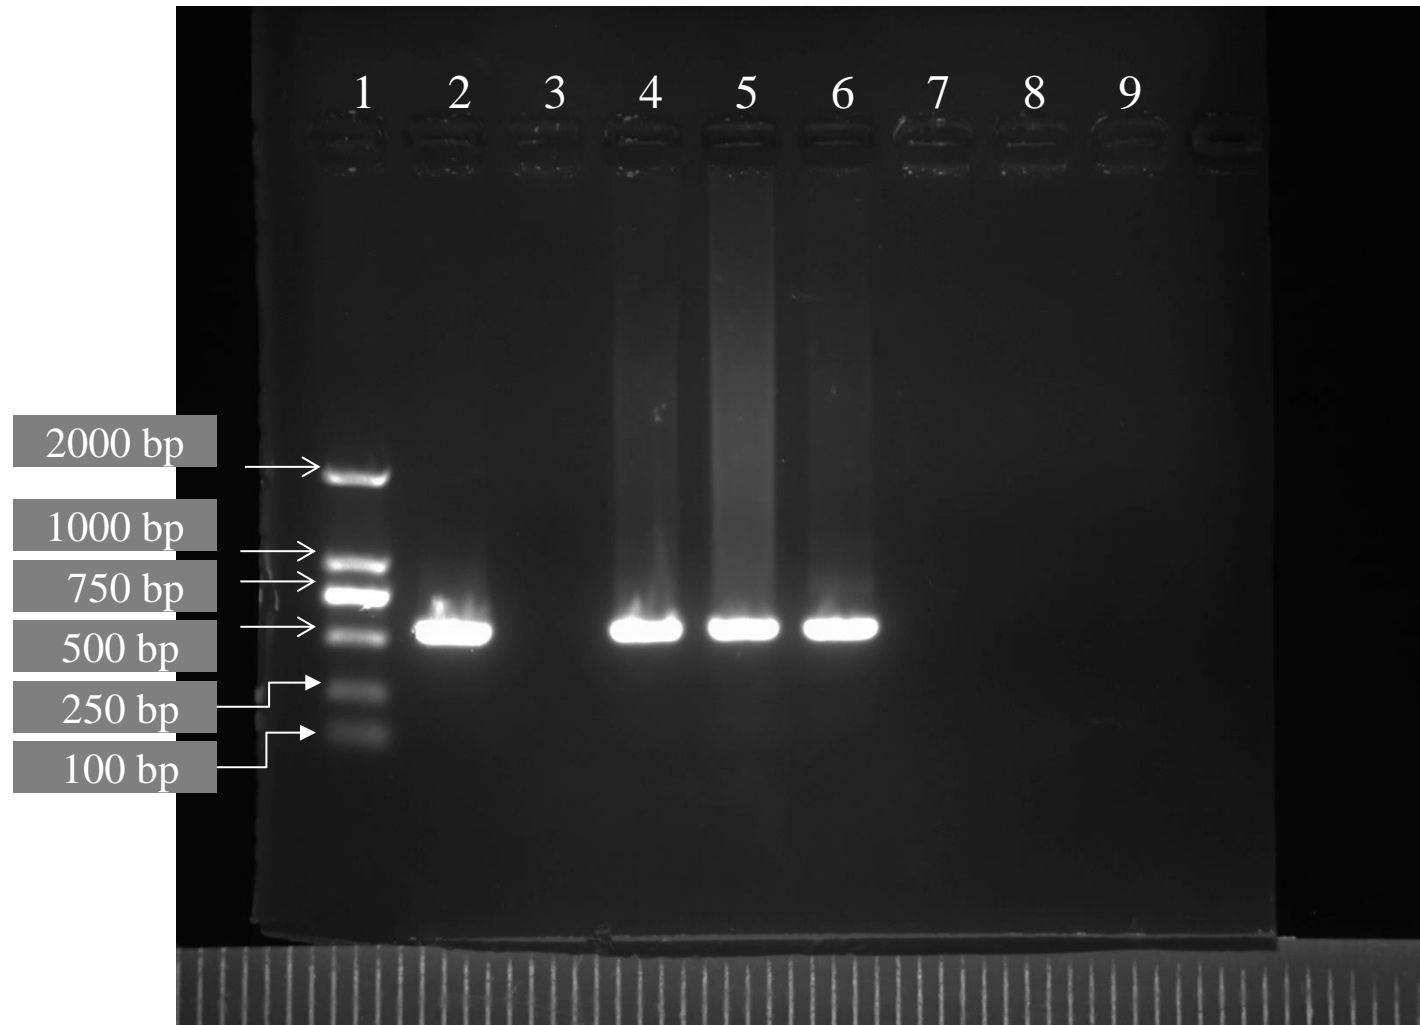

| Lane |                               |
|------|-------------------------------|
| 1    | DL2000 Maker                  |
| 2    | Positive control              |
| 3    | Negative control              |
| 4    | WRR <sub>1</sub> <sup>+</sup> |
| 5    | WRR <sub>2</sub> <sup>+</sup> |
| 6    | WRR <sub>3</sub> <sup>+</sup> |
| 7    | WRR <sub>1</sub> <sup>-</sup> |
| 8    | WRR <sub>2</sub> <sup>-</sup> |
| 9    | WRR <sub>3</sub> <sup>-</sup> |

Figure S2 B: Exogenous ALVs (A-D) was detected by PCR

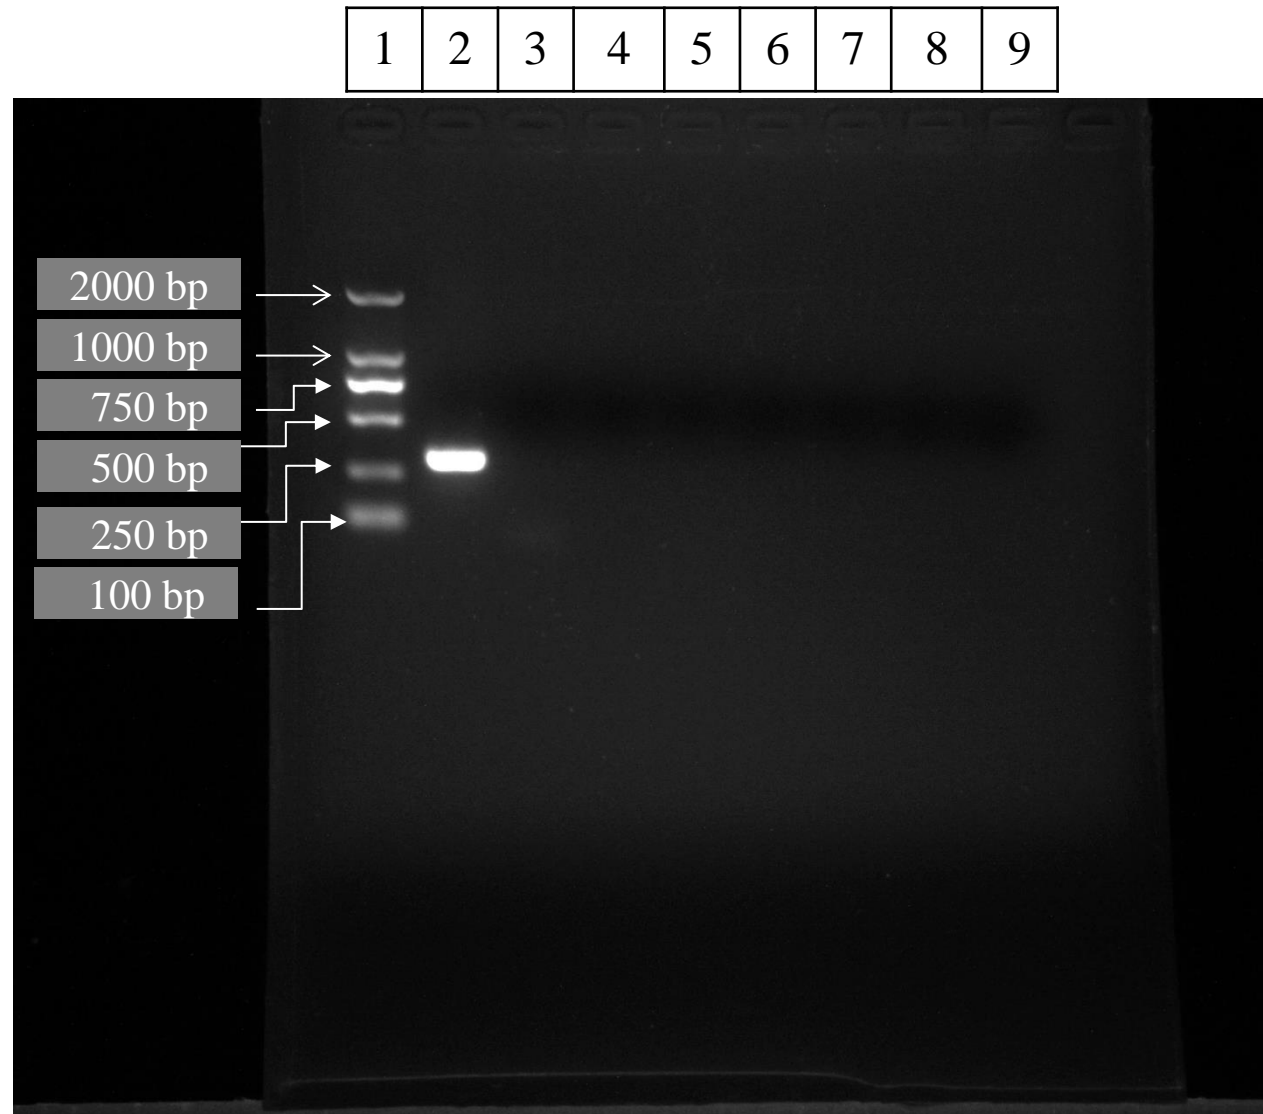

| Lane |                               |
|------|-------------------------------|
| 1    | DL2000 Maker                  |
| 2    | Positive control              |
| 3    | Negative control              |
| 4    | WRR <sub>1</sub> <sup>+</sup> |
| 5    | WRR <sub>2</sub> <sup>+</sup> |
| 6    | WRR <sub>3</sub> <sup>+</sup> |
| 7    | WRR <sub>1</sub> <sup>-</sup> |
| 8    | WRR <sub>2</sub> <sup>-</sup> |
| 9    | WRR <sub>3</sub> <sup>-</sup> |

Figure S2 C: MDV was detected by PCR

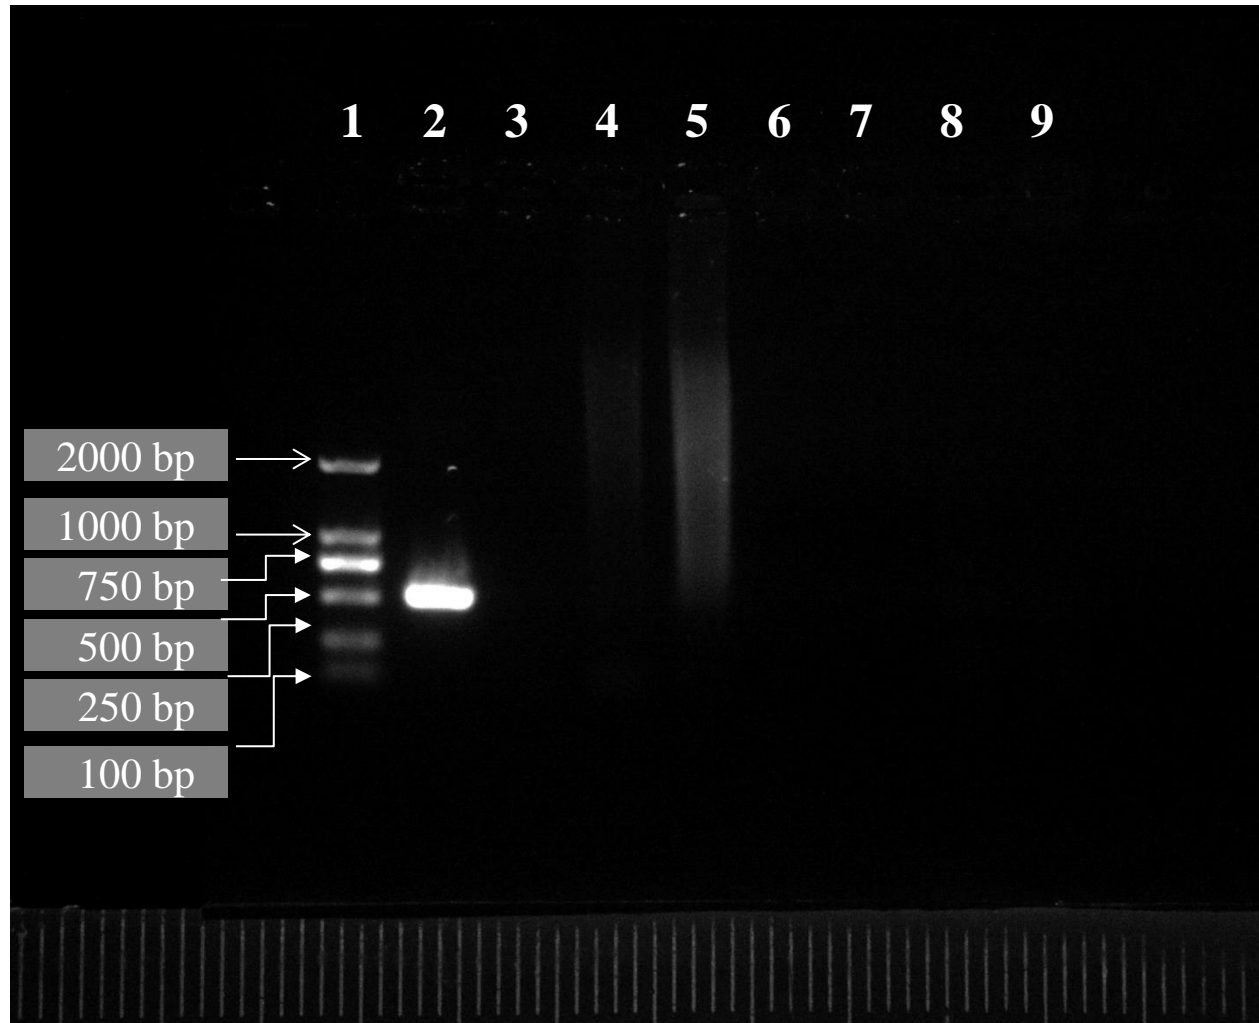

| Lane |                               |
|------|-------------------------------|
| 1    | DL2000 Maker                  |
| 2    | Positive control              |
| 3    | Negative control              |
| 4    | WRR <sub>1</sub> <sup>+</sup> |
| 5    | WRR <sub>2</sub> <sup>+</sup> |
| 6    | WRR <sub>3</sub> <sup>+</sup> |
| 7    | WRR <sub>1</sub> <sup>-</sup> |
| 8    | WRR <sub>2</sub> <sup>-</sup> |
| 9    | WRR <sub>3</sub> <sup>-</sup> |

Figure S2 D: REV was detected by PCR

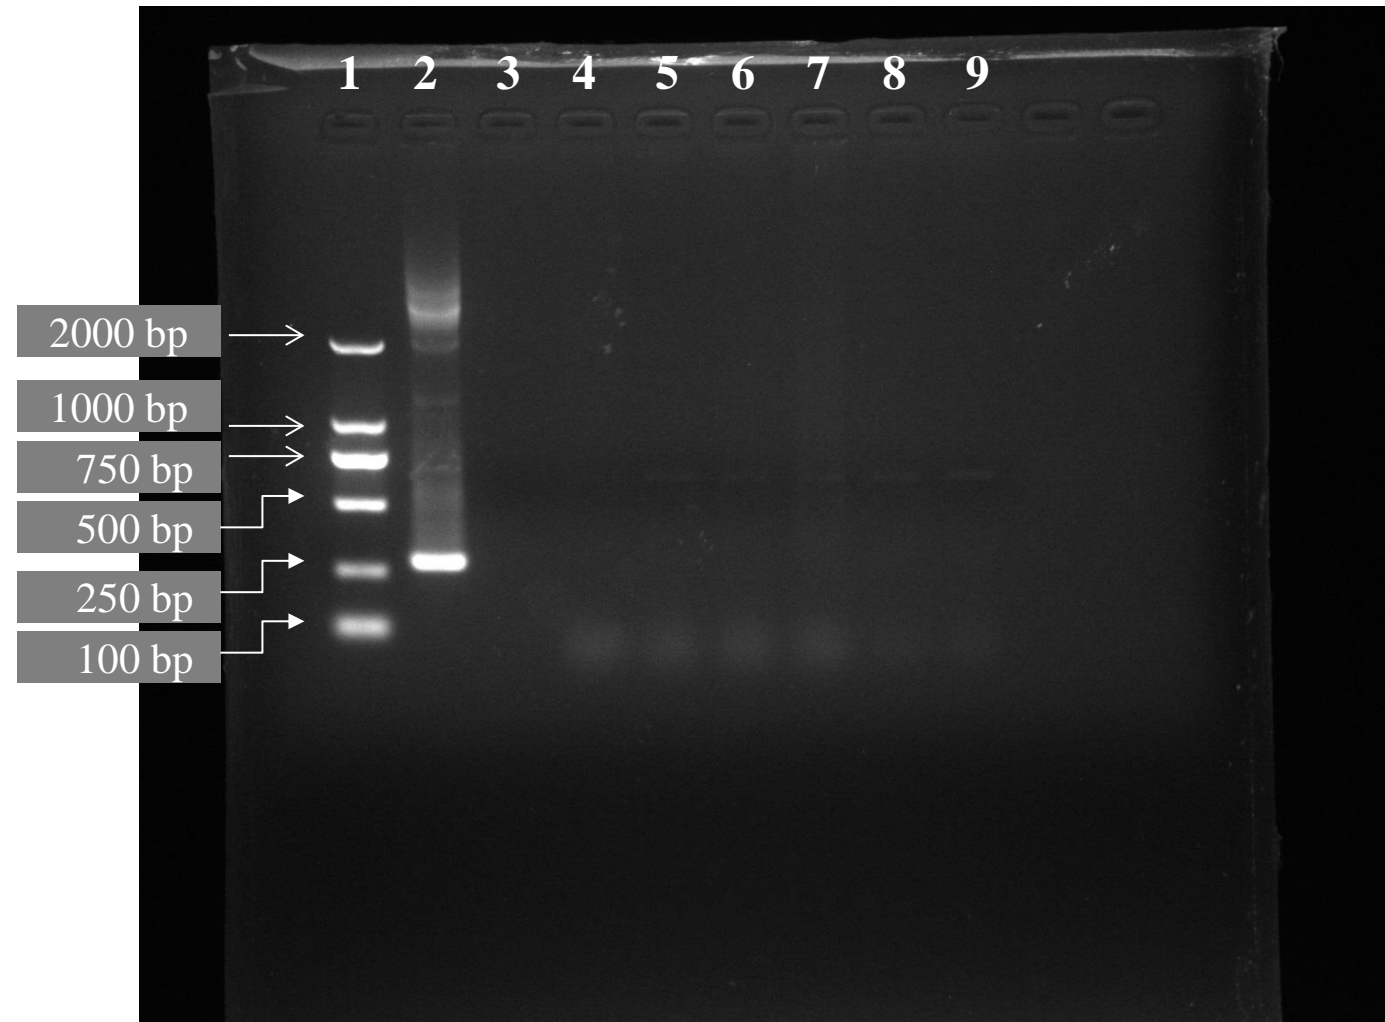

| Lane |                               |
|------|-------------------------------|
| 1    | DL2000 Maker                  |
| 2    | Positive control              |
| 3    | Negative control              |
| 4    | WRR <sub>1</sub> <sup>+</sup> |
| 5    | WRR <sub>2</sub> <sup>+</sup> |
| 6    | WRR <sub>3</sub> <sup>+</sup> |
| 7    | WRR <sub>1</sub> <sup>-</sup> |
| 8    | WRR <sub>2</sub> <sup>-</sup> |
| 9    | WRR <sub>3</sub> <sup>-</sup> |

Figure S3 A (For IRF1)

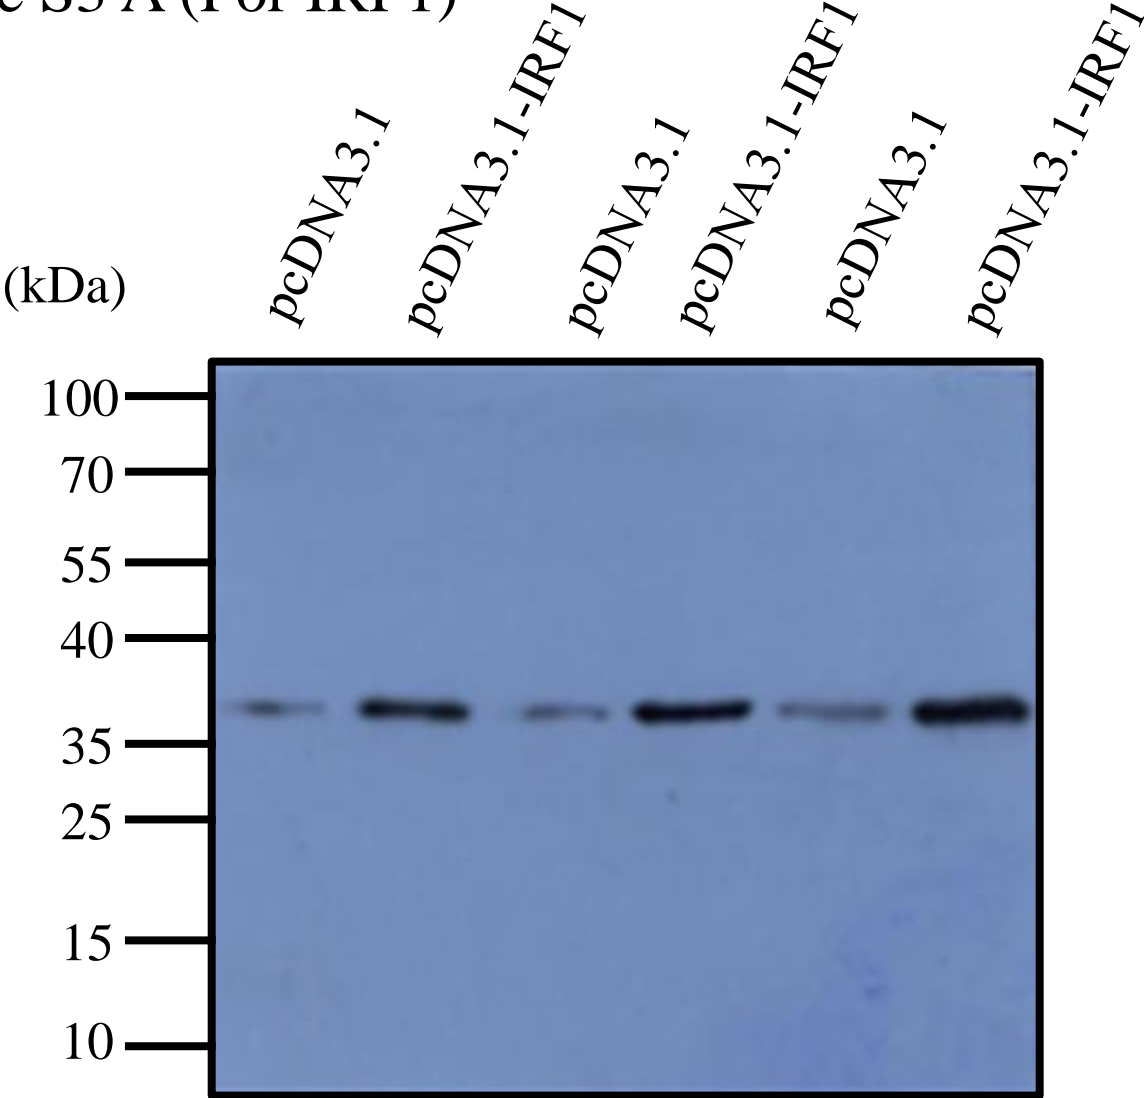



Figure S3 B (For IRF1)

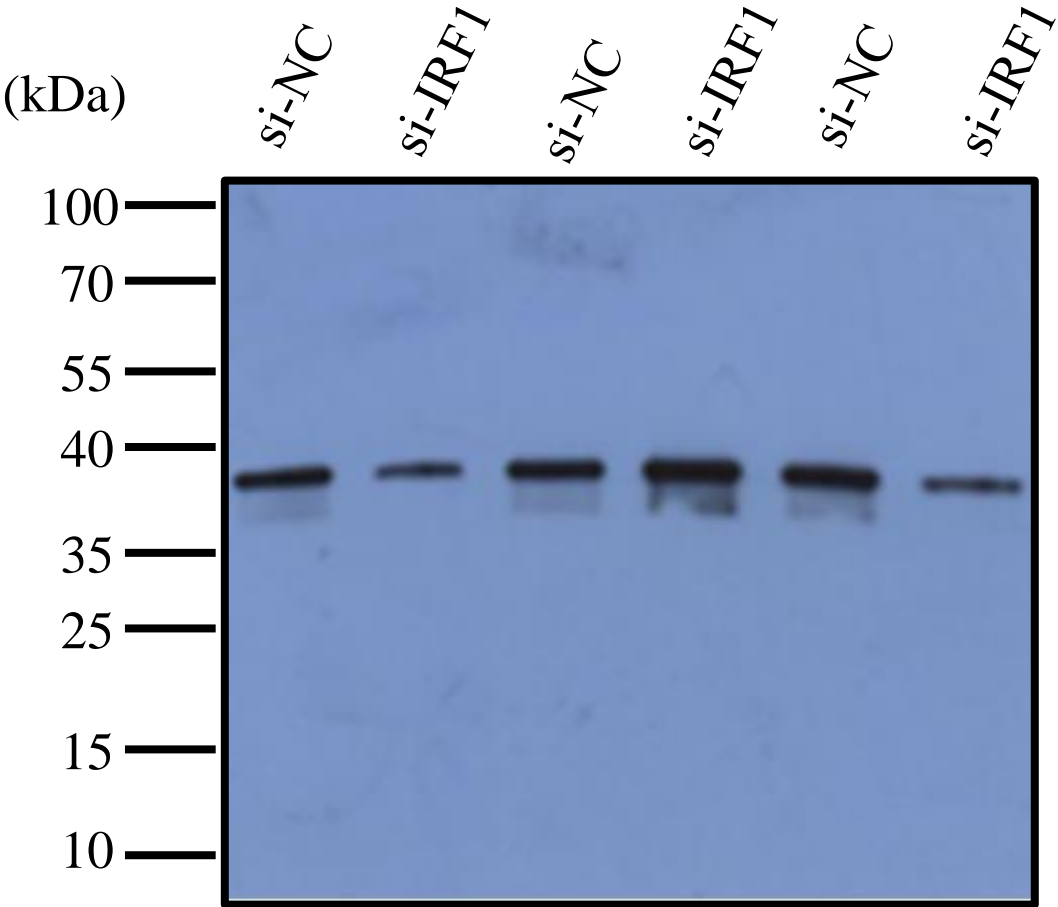

Figure S3 C (For IRF1)

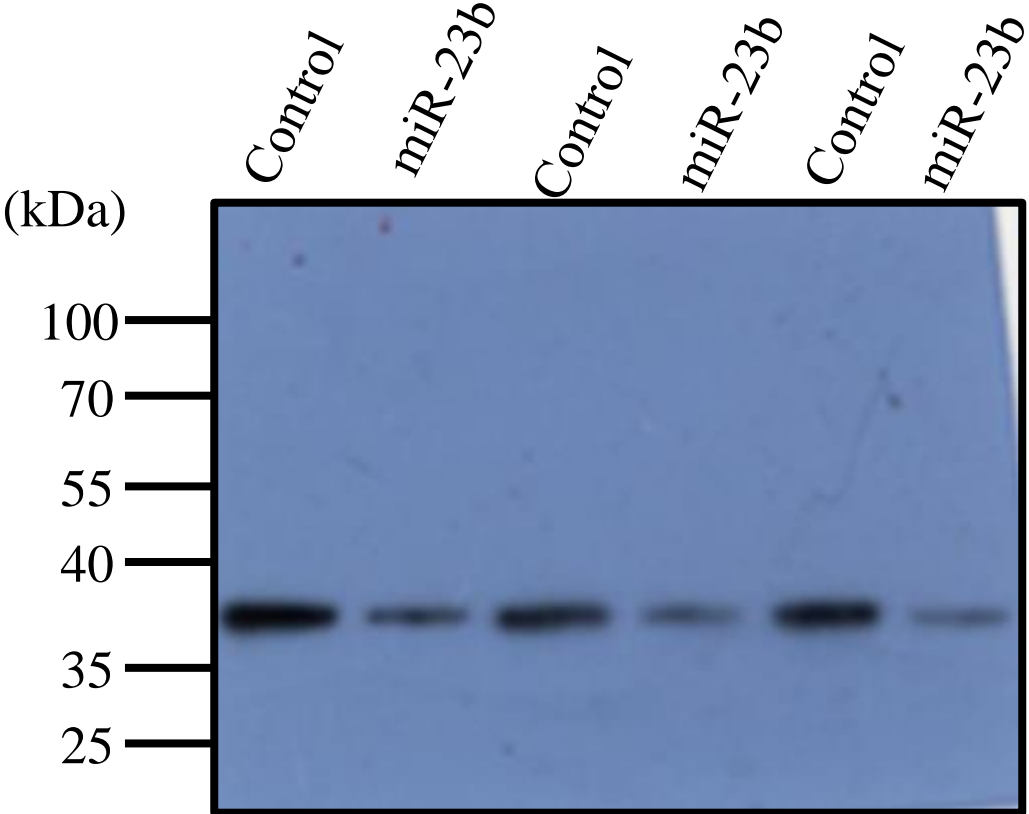

Figure S3 D (For IRF1)

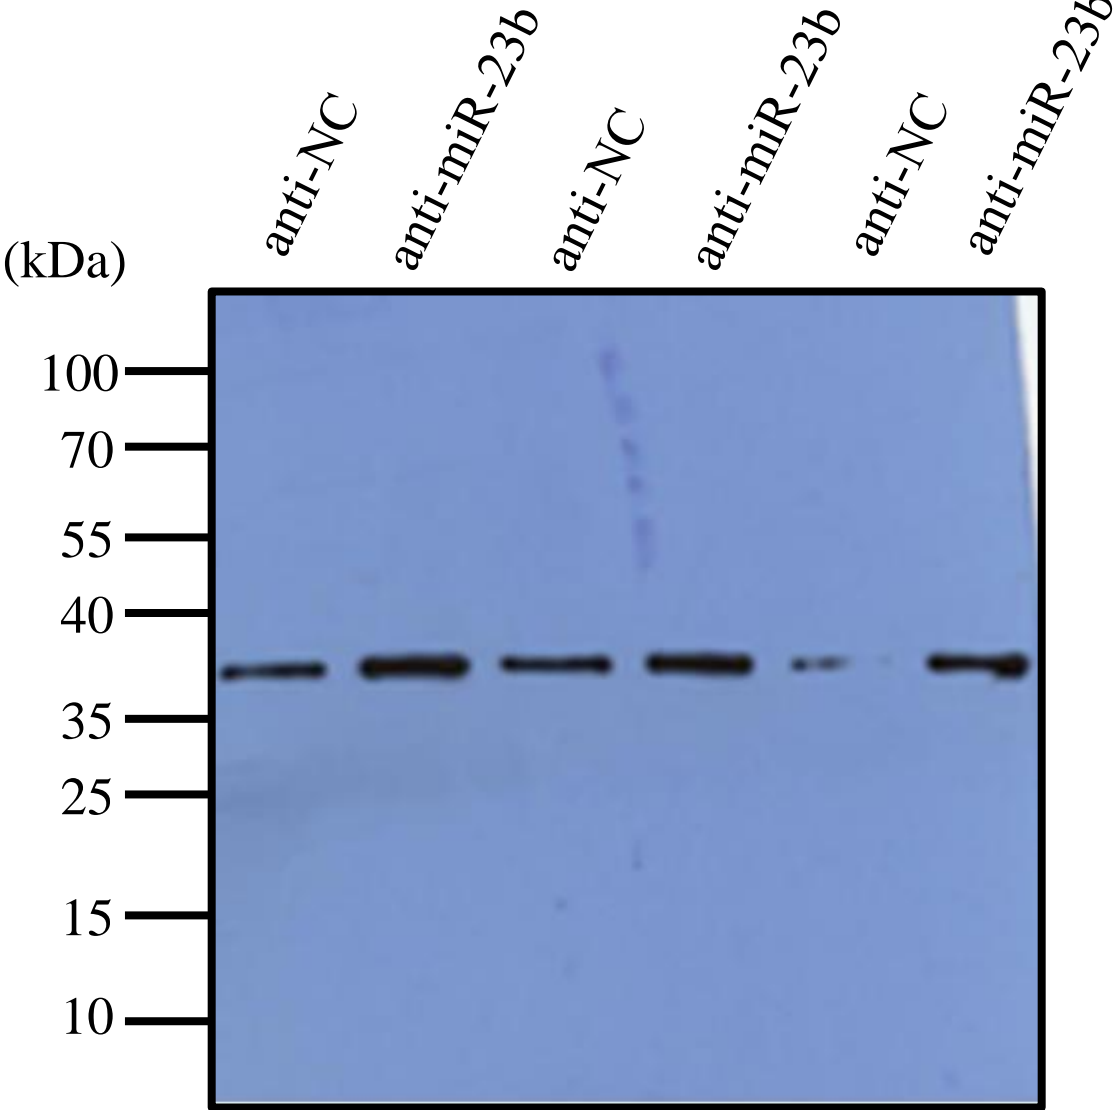

Figure S3 E (For gp85)

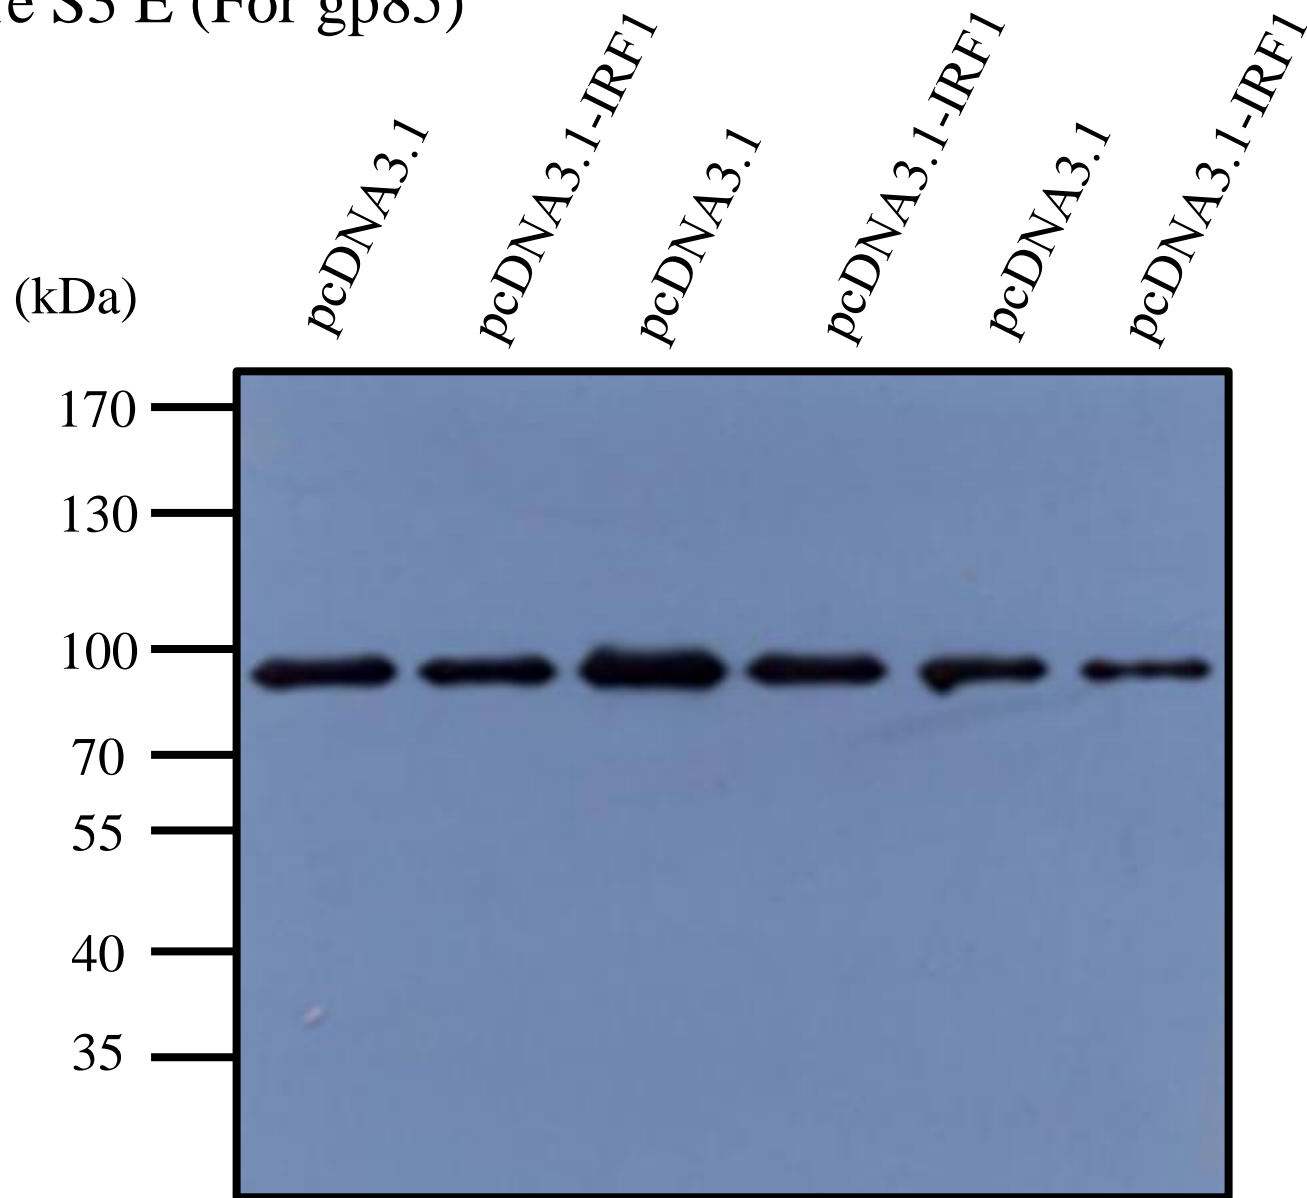

Figure S3 F (For gp85)

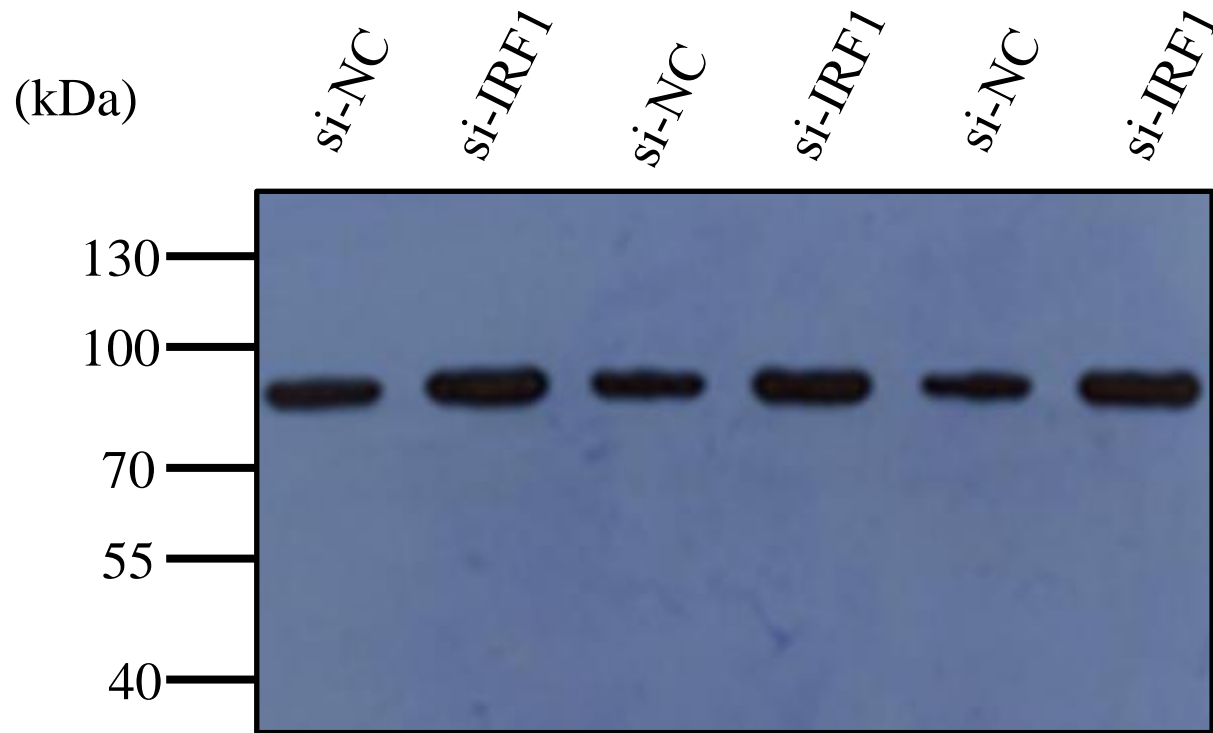

Figure S3 G (For gp85)

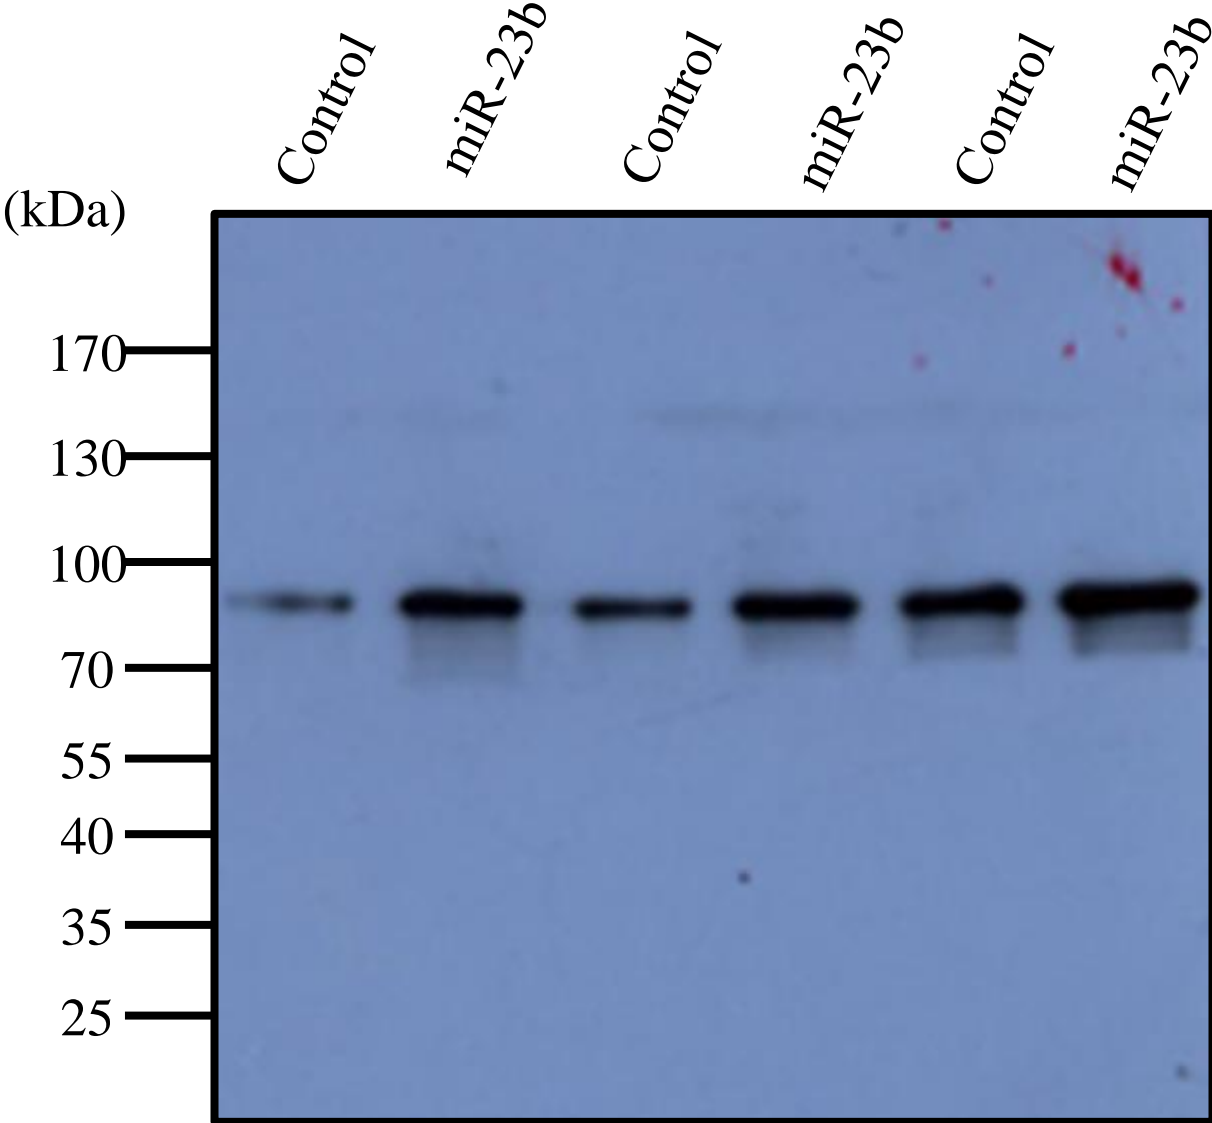

Figure S3 H (For gp85)

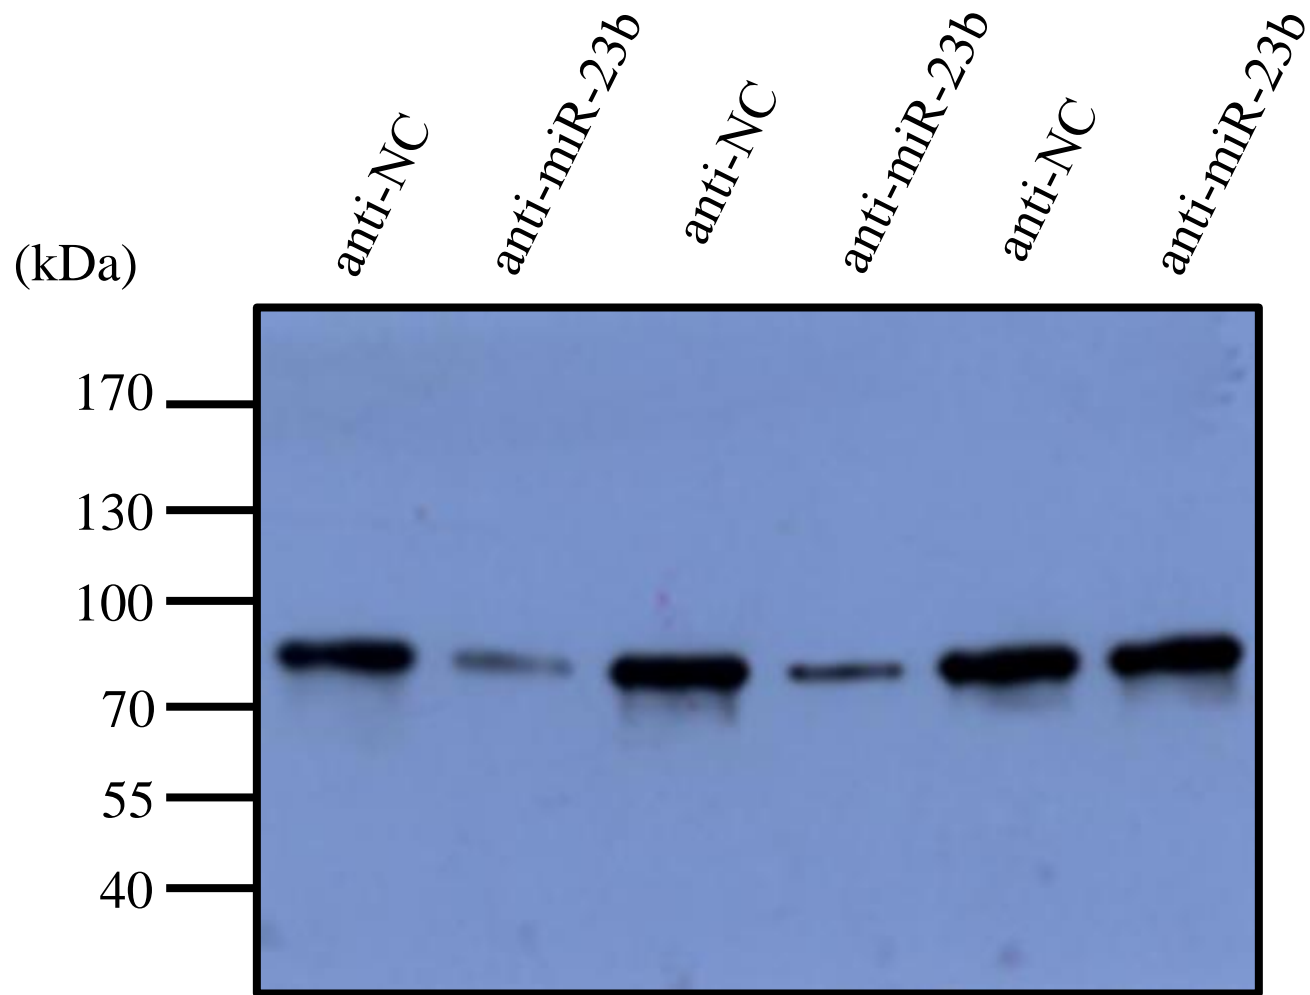

## Supplementary Tables.

| <b>miRNA name</b> | <b>ALV-J infected spleens (WRR<sup>+</sup>) FPKM</b> | <b>Uninfected spleens (WRR<sup>-</sup>) FPKM</b> | <b>log2 Ratio(WRR<sup>+</sup>/WRR<sup>-</sup>)</b> | <b>q value</b> | <b>Regualtion<sup>a</sup></b> |
|-------------------|------------------------------------------------------|--------------------------------------------------|----------------------------------------------------|----------------|-------------------------------|
| gga-miR-10a-5p    | 11492986.7200                                        | 10095802.8900                                    | 0.1870                                             | 0              | up                            |
| gga-miR-10b       | 9358782.6500                                         | 8271177.7400                                     | 0.1782                                             | 0              | up                            |
| gga-let-7c        | 1206765.5800                                         | 888120.1100                                      | 0.4423                                             | 0              | up                            |
| gga-let-7j        | 2472908.1900                                         | 2066848.0700                                     | 0.2588                                             | 0              | up                            |
| gga-let-7f        | 2489453.1800                                         | 2100290.0400                                     | 0.2452                                             | 0              | up                            |
| gga-miR-181a-5p   | 3651195.6500                                         | 3273091.2900                                     | 0.1577                                             | 0              | up                            |
| gga-miR-30c       | 419880.0200                                          | 323629.2100                                      | 0.3756                                             | 0              | up                            |
| gga-miR-26a       | 6688359.3900                                         | 6171874.2100                                     | 0.1159                                             | 0              | up                            |
| gga-let-7b        | 219225.5900                                          | 155761.7100                                      | 0.4931                                             | 0              | up                            |
| gga-let-7k        | 1423599.8300                                         | 1253924.5900                                     | 0.1831                                             | 0              | up                            |
| gga-let-7g        | 415491.9700                                          | 344797.1400                                      | 0.2691                                             | 0              | up                            |
| gga-miR-126-5p    | 734929.9200                                          | 649284.9800                                      | 0.1788                                             | 0              | up                            |
| gga-miR-92        | 1955472.2000                                         | 1805797.3200                                     | 0.1149                                             | 0              | up                            |
| gga-miR-126-3p    | 251561.6500                                          | 212306.3900                                      | 0.2448                                             | 0              | up                            |
| gga-miR-30b       | 89639.8200                                           | 73254.1900                                       | 0.2912                                             | 2.08E-267      | up                            |
| gga-miR-181b      | 154771.3800                                          | 132460.1600                                      | 0.2246                                             | 5.52E-255      | up                            |
| gga-miR-125b      | 342385.3600                                          | 306407.3300                                      | 0.1602                                             | 1.77E-244      | up                            |
| gga-miR-204       | 18812.6400                                           | 12564.6400                                       | 0.5823                                             | 7.28E-237      | up                            |
| gga-miR-211       | 18812.6400                                           | 12564.6400                                       | 0.5823                                             | 7.28E-237      | up                            |
| gga-miR-30d       | 2395549.0000                                         | 2262888.5000                                     | 0.0822                                             | 1.05E-219      | up                            |
| gga-let-7i        | 282160.1700                                          | 252057.4400                                      | 0.1628                                             | 3.88E-210      | up                            |
| gga-miR-223       | 114460.2600                                          | 97374.0100                                       | 0.2332                                             | 2.84E-206      | up                            |
| gga-miR-221       | 154412.0900                                          | 135297.3400                                      | 0.1907                                             | 1.07E-171      | up                            |
| gga-miR-106       | 65066.7700                                           | 55680.5300                                       | 0.2247                                             | 5.82E-108      | up                            |
| gga-miR-200a      | 541.8800                                             | 53.5300                                          | 3.3396                                             | 6.11E-98       | up                            |
| gga-miR-499       | 3145.2600                                            | 1636.5400                                        | 0.9425                                             | 1.48E-97       | up                            |
| gga-miR-6557-3p   | 1018.9700                                            | 305.8900                                         | 1.7360                                             | 5.78E-85       | up                            |
| gga-miR-383       | 1319.3600                                            | 512.3700                                         | 1.3646                                             | 2.03E-76       | up                            |
| gga-miR-34b       | 589.0000                                             | 122.3600                                         | 2.2671                                             | 1.15E-70       | up                            |
| gga-miR-34c       | 589.0000                                             | 122.3600                                         | 2.2671                                             | 1.15E-70       | up                            |
| gga-miR-2188      | 151484.7600                                          | 138119.2200                                      | 0.1333                                             | 2.57E-66       | up                            |
| gga-miR-128       | 107498.2800                                          | 97029.8800                                       | 0.1478                                             | 1.06E-62       | up                            |
| gga-miR-24        | 30380.5900                                           | 25641.6400                                       | 0.2447                                             | 5.81E-62       | up                            |
| gga-miR-200b      | 388.7400                                             | 53.5300                                          | 2.8604                                             | 4.43E-61       | up                            |
| gga-miR-17-5p     | 90794.2600                                           | 81719.8400                                       | 0.1519                                             | 4.22E-57       | up                            |
| gga-miR-6606-5p   | 665.5700                                             | 214.1300                                         | 1.6361                                             | 2.31E-51       | up                            |
| gga-miR-214       | 43191.3300                                           | 37778.0300                                       | 0.1932                                             | 2.13E-50       | up                            |
| gga-miR-1664-3p   | 1030.7500                                            | 451.2000                                         | 1.1919                                             | 2.19E-48       | up                            |
| gga-miR-29b       | 30498.3900                                           | 26528.7400                                       | 0.2012                                             | 1.54E-39       | up                            |
| gga-miR-27b       | 229915.9200                                          | 214952.3800                                      | 0.0971                                             | 1.74E-38       | up                            |
| gga-miR-6552-3p   | 164.9200                                             | 0.0000                                           | 8.3656                                             | 5.15E-34       | up                            |
| gga-miR-1744-3p   | 223.8200                                             | 38.2400                                          | 2.5492                                             | 1.47E-31       | up                            |
| gga-miR-551-3p    | 200.2600                                             | 30.5900                                          | 2.7107                                             | 2.67E-30       | up                            |
| gga-miR-20a       | 65325.9300                                           | 59511.8600                                       | 0.1345                                             | 5.90E-30       | up                            |
| gga-miR-32        | 16079.6800                                           | 13902.9300                                       | 0.2098                                             | 1.47E-23       | up                            |
| gga-miR-1416-5p   | 1372.3700                                            | 894.7400                                         | 0.6171                                             | 2.15E-20       | up                            |
| gga-miR-6557-5p   | 235.6000                                             | 76.4700                                          | 1.6234                                             | 1.01E-18       | up                            |
| gga-miR-153       | 20691.5500                                           | 18376.6400                                       | 0.1712                                             | 1.46E-18       | up                            |
| gga-miR-23b       | 85858.4500                                           | 79938.0000                                       | 0.1031                                             | 3.88E-18       | up                            |
| gga-miR-1684b-3p  | 1148.5500                                            | 741.8000                                         | 0.6307                                             | 5.87E-18       | up                            |
| gga-miR-33        | 6149.1500                                            | 5070.2100                                        | 0.2783                                             | 1.15E-17       | up                            |
| gga-miR-1684a-3p  | 1272.2400                                            | 848.8600                                         | 0.5838                                             | 3.49E-17       | up                            |
| gga-miR-218       | 2273.5400                                            | 1690.0700                                        | 0.4279                                             | 1.58E-16       | up                            |
| gga-miR-148a      | 1334325.1800                                         | 1284575.2600                                     | 0.0548                                             | 1.74E-15       | up                            |
| gga-miR-449a      | 70.6800                                              | 7.6500                                           | 3.2078                                             | 2.54E-13       | up                            |



|                 |              |              |         |             |      |
|-----------------|--------------|--------------|---------|-------------|------|
| gga-miR-1559    | 25821.7300   | 23523.3200   | 0.1345  | 1.64E-12    | up   |
| gga-miR-1655    | 217.9300     | 91.7700      | 1.2478  | 6.84E-12    | up   |
| gga-miR-365     | 1896.5800    | 1460.6500    | 0.3768  | 6.00E-11    | up   |
| gga-miR-449b-5p | 58.9000      | 7.6500       | 2.9447  | 1.83E-10    | up   |
| gga-miR-449c-5p | 106.0200     | 30.5900      | 1.7932  | 3.00E-10    | up   |
| gga-miR-15a     | 179756.7300  | 178313.8200  | 0.0116  | 6.85E-09    | up   |
| gga-miR-1552-5p | 907.0600     | 650.0300     | 0.4807  | 7.29E-09    | up   |
| gga-miR-3525    | 465.3100     | 298.2500     | 0.6417  | 4.12E-08    | up   |
| gga-miR-3531    | 29.4500      | 0.0000       | 5.8802  | 6.47E-08    | up   |
| gga-miR-196     | 241.4900     | 130.0100     | 0.8933  | 8.20E-08    | up   |
| gga-miR-429     | 376.9600     | 237.0700     | 0.6691  | 3.06E-07    | up   |
| gga-miR-10a-3p  | 9365.0900    | 8419.7600    | 0.1535  | 5.33E-07    | up   |
| gga-let-7d      | 3015.6800    | 2554.2200    | 0.2396  | 8.03E-07    | up   |
| gga-miR-1648-5p | 23.5600      | 0.0000       | 5.5583  | 1.54E-06    | up   |
| gga-miR-3532    | 23.5600      | 0.0000       | 5.5583  | 1.54E-06    | up   |
| gga-miR-6552-5p | 23.5600      | 0.0000       | 5.5583  | 1.54E-06    | up   |
| gga-miR-2964    | 136011.7500  | 134807.9100  | 0.0128  | 1.66E-06    | up   |
| gga-miR-1782    | 294.5000     | 183.5400     | 0.6822  | 4.48E-06    | up   |
| gga-miR-1666    | 17.6700      | 0.0000       | 5.1432  | 4.23E-05    | up   |
| gga-miR-206     | 17.6700      | 0.0000       | 5.1432  | 4.23E-05    | up   |
| gga-miR-6677-5p | 17.6700      | 0.0000       | 5.1432  | 4.23E-05    | up   |
| gga-miR-460b-5p | 806.9300     | 627.0800     | 0.3638  | 6.04E-05    | up   |
| gga-miR-103     | 189492.8900  | 186649.4500  | 0.0218  | 0.000170965 | up   |
| gga-miR-137     | 94.2400      | 45.8800      | 1.0385  | 0.000174111 | up   |
| gga-miR-1306    | 371.0700     | 267.6600     | 0.4713  | 0.000422017 | up   |
| gga-miR-1729-5p | 3687.1400    | 3280.7200    | 0.1685  | 0.000504673 | up   |
| gga-miR-2130    | 29.4500      | 7.6500       | 1.9447  | 0.000695053 | up   |
| gga-miR-6568-3p | 29.4500      | 7.6500       | 1.9447  | 0.000695053 | up   |
| gga-miR-21      | 2604101.9200 | 4456262.3700 | -0.7750 | 0           | down |
| gga-miR-22-3p   | 2389181.9200 | 3014197.0900 | -0.3353 | 0           | down |
| gga-miR-146c-5p | 1645422.9000 | 2124455.7400 | -0.3686 | 0           | down |
| gga-miR-222b-3p | 49805.7900   | 103553.0900  | -1.0560 | 0           | down |
| gga-miR-142-3p  | 470663.5500  | 571113.5200  | -0.2791 | 0           | down |
| gga-miR-451     | 646273.7300  | 757885.3300  | -0.2298 | 0           | down |
| gga-miR-155     | 121828.6400  | 168379.8800  | -0.4669 | 0           | down |
| gga-miR-144     | 33785.0100   | 56537.0300   | -0.7428 | 0           | down |
| gga-miR-146a    | 290082.2200  | 342862.3600  | -0.2412 | 0           | down |
| gga-miR-142-5p  | 3575096.9200 | 3622805.6900 | -0.0191 | 0           | down |
| gga-miR-30a-5p  | 3959377.8100 | 3984656.4800 | -0.0092 | 0           | down |
| gga-miR-30e     | 2745756.2800 | 2781204.5500 | -0.0185 | 0           | down |
| gga-miR-199-5p  | 148180.4700  | 169687.5800  | -0.1955 | 0           | down |
| gga-miR-140-3p  | 455396.6800  | 486181.7900  | -0.0944 | 0           | down |
| gga-miR-147     | 9553.5700    | 16342.4400   | -0.7745 | 0           | down |
| gga-miR-146c-3p | 8440.3600    | 14713.5500   | -0.8018 | 0           | down |
| gga-miR-100     | 494105.7300  | 518881.9600  | -0.0706 | 0           | down |
| gga-miR-99a-5p  | 357275.2700  | 377030.8200  | -0.0776 | 8.16E-270   | down |
| gga-miR-181a-3p | 41500.9000   | 48231.9900   | -0.2168 | 6.18E-156   | down |
| gga-miR-222a    | 60201.6300   | 67564.5500   | -0.1665 | 6.84E-144   | down |
| gga-miR-456     | 51926.1900   | 58754.7700   | -0.1782 | 3.07E-139   | down |
| gga-miR-301b-3p | 102179.6200  | 109525.6900  | -0.1002 | 1.46E-110   | down |
| gga-miR-301a    | 95459.1400   | 101939.4900  | -0.0948 | 1.71E-95    | down |
| gga-miR-222b-5p | 4982.9400    | 6829.1000    | -0.4547 | 7.54E-76    | down |
| gga-miR-9-3p    | 117.8000     | 565.9100     | -2.2642 | 9.06E-73    | down |
| gga-miR-215     | 4894.5900    | 6546.1500    | -0.4195 | 1.07E-63    | down |
| gga-miR-20b     | 20880.0300   | 23599.8000   | -0.1767 | 7.61E-56    | down |
| gga-miR-199-3p  | 493398.9300  | 493951.5200  | -0.0016 | 3.65E-47    | down |
| gga-miR-19b     | 246119.3000  | 249258.5000  | -0.0183 | 5.42E-46    | down |
| gga-miR-1662    | 2621.0500    | 3655.4400    | -0.4799 | 5.93E-45    | down |
| gga-miR-15b     | 159029.8400  | 161443.7100  | -0.0217 | 1.32E-33    | down |
| gga-miR-1769-3p | 965.9600     | 1537.1200    | -0.6702 | 2.70E-33    | down |
| gga-miR-130a    | 91129.9900   | 93596.2100   | -0.0385 | 2.70E-31    | down |
| gga-miR-130c-3p | 99411.3200   | 101679.4800  | -0.0325 | 3.40E-29    | down |
| gga-miR-3523    | 1030.7500    | 1567.7100    | -0.6050 | 8.10E-29    | down |
| gga-miR-19a     | 234463.0000  | 235546.7600  | -0.0067 | 1.63E-28    | down |

|                 |             |             |         |             |      |
|-----------------|-------------|-------------|---------|-------------|------|
| gga-miR-1769-5p | 347.5100    | 672.9700    | -0.9535 | 4.19E-26    | down |
| gga-miR-15c-5p  | 223631.3000 | 224458.0700 | -0.0053 | 8.92E-26    | down |
| gga-miR-130c-5p | 600.7800    | 1001.8100   | -0.7377 | 1.07E-25    | down |
| gga-miR-194     | 176.7000    | 412.9600    | -1.2247 | 9.89E-24    | down |
| gga-miR-16      | 229821.6900 | 230208.8900 | -0.0024 | 2.43E-23    | down |
| gga-miR-133c    | 15690.9400  | 16984.8200  | -0.1143 | 1.41E-21    | down |
| gga-miR-1674    | 259.1600    | 512.3700    | -0.9833 | 4.29E-21    | down |
| gga-miR-133a    | 17092.7600  | 18384.2900  | -0.1051 | 9.06E-21    | down |
| gga-miR-99a-3p  | 2768.3000   | 3418.3800   | -0.3043 | 2.98E-20    | down |
| gga-miR-34a     | 3115.8100   | 3785.4500   | -0.2809 | 1.13E-19    | down |
| gga-miR-1563    | 624.3400    | 963.5700    | -0.6261 | 3.80E-19    | down |
| gga-miR-133b    | 15514.2400  | 16694.2200  | -0.1058 | 3.94E-19    | down |
| gga-miR-146b-3p | 2238.2000   | 2806.5900   | -0.3265 | 8.80E-19    | down |
| gga-miR-193b    | 24602.5100  | 25817.5300  | -0.0695 | 4.18E-17    | down |
| gga-miR-458a-3p | 16291.7200  | 17359.5400  | -0.0916 | 1.72E-16    | down |
| gga-miR-1329-5p | 371.0700    | 619.4400    | -0.7393 | 2.15E-16    | down |
| gga-miR-16c     | 28083.4900  | 29151.7900  | -0.0539 | 1.86E-14    | down |
| gga-miR-6546-5p | 23.5600     | 99.4200     | -2.0772 | 1.81E-12    | down |
| gga-miR-3536    | 58.9000     | 152.9500    | -1.3767 | 4.53E-11    | down |
| gga-miR-6649-5p | 5.8900      | 53.5300     | -3.1840 | 9.30E-11    | down |
| gga-miR-193a    | 2191.0800   | 2561.8700   | -0.2256 | 7.26E-10    | down |
| gga-miR-3535    | 0.0000      | 30.5900     | -5.9350 | 2.24E-08    | down |
| gga-miR-454-3p  | 25474.2300  | 26024.0100  | -0.0308 | 6.52E-08    | down |
| gga-miR-490     | 907.0600    | 1124.1600   | -0.3096 | 1.54E-07    | down |
| gga-miR-190     | 1666.8700   | 1934.7900   | -0.2150 | 3.39E-07    | down |
| gga-miR-1756a   | 259.1600    | 382.3700    | -0.5611 | 5.07E-07    | down |
| gga-miR-183     | 4252.5800   | 4619.0100   | -0.1192 | 5.56E-07    | down |
| gga-miR-6553-3p | 200.2600    | 305.8900    | -0.6111 | 1.48E-06    | down |
| gga-miR-1452    | 0.0000      | 22.9400     | -5.5198 | 1.53E-06    | down |
| gga-miR-1797    | 0.0000      | 22.9400     | -5.5198 | 1.53E-06    | down |
| gga-miR-1668-3p | 53.0100     | 114.7100    | -1.1137 | 1.65E-06    | down |
| gga-miR-18b     | 8446.2500   | 8832.7200   | -0.0645 | 4.71E-06    | down |
| gga-miR-18a     | 9088.2600   | 9444.5100   | -0.0555 | 1.63E-05    | down |
| gga-miR-6631-5p | 147.2500    | 229.4200    | -0.6397 | 1.67E-05    | down |
| gga-miR-6548-5p | 70.6800     | 130.0100    | -0.8792 | 2.73E-05    | down |
| gga-miR-6542-3p | 88.3500     | 152.9500    | -0.7918 | 2.91E-05    | down |
| gga-miR-1742    | 5.8900      | 30.5900     | -2.3767 | 3.76E-05    | down |
| gga-miR-1698    | 23.5600     | 61.1800     | -1.3767 | 4.80E-05    | down |
| gga-miR-1712-3p | 23.5600     | 61.1800     | -1.3767 | 4.80E-05    | down |
| gga-miR-1458    | 29.4500     | 68.8300     | -1.2248 | 8.01E-05    | down |
| gga-miR-1585    | 0.0000      | 15.2900     | -4.9345 | 0.000124084 | down |
| gga-miR-1587    | 0.0000      | 15.2900     | -4.9345 | 0.000124084 | down |
| gga-miR-1626-5p | 0.0000      | 15.2900     | -4.9345 | 0.000124084 | down |
| gga-miR-1668-5p | 0.0000      | 15.2900     | -4.9345 | 0.000124084 | down |
| gga-miR-1699    | 0.0000      | 15.2900     | -4.9345 | 0.000124084 | down |
| gga-miR-6614-3p | 0.0000      | 15.2900     | -4.9345 | 0.000124084 | down |
| gga-miR-138     | 530.1000    | 650.0300    | -0.2942 | 0.000170237 | down |
| gga-miR-1728-3p | 17.6700     | 45.8800     | -1.3766 | 0.000496471 | down |

<sup>a</sup>"up" means miRNA was up-regulated in ALV-J infected compared to uninfected chicken spleens.

"down" means miRNA was down-regulated in ALV-J infected compared to uninfected chicken spleens.

**Table S2. Differential expression analysis of genes in AVL-J infected compared with uninfected chicken spleens using DEG.**

| Ensemble id         | Wikigenes  | ALV-J infected spleens (WRR+) FPKM | Uninfected spleens (WRR-) FPKM | log2 Ratio(WRR+/WRR-) | q value     | Regualtion <sup>a</sup> |
|---------------------|------------|------------------------------------|--------------------------------|-----------------------|-------------|-------------------------|
| ENSGALG0000003493   | RPS27L     | 6308.7100                          | 3976.3100                      | 0.6659                | 0.0220731   | up                      |
| ENSGALG0000002157   | RPS17L     | 1814.4900                          | 1176.1700                      | 0.6255                | 0.0280457   | up                      |
| ENSGALG00000010336  | LOC422509  | 2524.1200                          | 1004.2100                      | 1.3297                | 5.27E-07    | up                      |
| ENSGALG00000024906  | U3         | 1676.1600                          | 965.8200                       | 0.7953                | 0.0437163   | up                      |
| ENSGALG00000009963  | LYZ        | 1433.3100                          | 617.0750                       | 1.2158                | 1.23E-08    | up                      |
| ENSGALG00000011351  | HSP90AA1   | 1016.7500                          | 616.8060                       | 0.7211                | 0.0125173   | up                      |
| ENSGALG00000011740  | MGP        | 883.6940                           | 395.8800                       | 1.1585                | 5.96E-07    | up                      |
| ENSGALG00000011888  | TGM4       | 843.3320                           | 355.8600                       | 1.2448                | 0.000728876 | up                      |
| ENSGALG00000012119  | MARCO      | 722.0030                           | 294.8210                       | 1.2922                | 0           | up                      |
| ENSGALG00000024011  | LCN8       | 273.5510                           | 170.8440                       | 0.6791                | 0.0120618   | up                      |
| ENSGALG00000011511  | CKB        | 200.7020                           | 139.0930                       | 0.5290                | 0.0422742   | up                      |
| ENSGALG00000011529  | NAAA       | 269.2540                           | 139.0210                       | 0.9537                | 5.44E-07    | up                      |
| ENSGALG00000012786  | SPIC       | 337.9230                           | 129.8490                       | 1.3799                | 6.11E-09    | up                      |
| ENSGALG00000015183  | RAB13      | 287.6880                           | 120.6020                       | 1.2543                | 9.42E-08    | up                      |
| ENSGALG00000013071  | CALD1      | 157.1000                           | 109.1120                       | 0.5259                | 0.0152297   | up                      |
| ENSGALG00000001164  | CR2        | 362.1960                           | 105.6140                       | 1.7780                | 0           | up                      |
| ENSGALG00000006520  | MYH11      | 145.9010                           | 99.5936                        | 0.5509                | 0.000114137 | up                      |
| ENSGALG00000001520  | GGA.42342  | 156.8590                           | 98.0308                        | 0.6782                | 0.0422132   | up                      |
| ENSGALG00000000318  | CSRP1      | 147.7800                           | 94.9176                        | 0.6387                | 0.0470582   | up                      |
| ENSGALG000000011916 | SREBF2     | 154.9140                           | 93.3359                        | 0.7310                | 0.00118533  | up                      |
| ENSGALG000000011214 | SERPINH1   | 139.9780                           | 87.3562                        | 0.6802                | 0.0218924   | up                      |
| ENSGALG00000009163  | S100A11    | 142.7400                           | 75.6869                        | 0.9153                | 0.0206325   | up                      |
| ENSGALG000000011446 | TNFAIP2    | 110.7420                           | 71.6364                        | 0.6284                | 0.0440577   | up                      |
| ENSGALG00000001446  | GSN        | 119.9340                           | 68.4778                        | 0.8085                | 3.41E-05    | up                      |
| ENSGALG00000004677  | VSIG4      | 160.3790                           | 67.0184                        | 1.2589                | 8.34E-05    | up                      |
| ENSGALG00000005060  | ENG        | 106.8560                           | 64.7816                        | 0.7220                | 0.0020994   | up                      |
| ENSGALG00000002667  | OLFML2B    | 92.1451                            | 56.8475                        | 0.6968                | 0.0180725   | up                      |
| ENSGALG00000015409  | PROS1      | 102.4680                           | 56.7780                        | 0.8518                | 0.00103892  | up                      |
| ENSGALG00000005069  | PTGS2      | 80.0275                            | 51.0210                        | 0.6494                | 0.027382    | up                      |
| ENSGALG00000018702  | novel gene | 103.5560                           | 45.1726                        | 1.1969                | 0.0349361   | up                      |
| ENSGALG00000000227  | DPYSL2     | 69.4370                            | 45.1659                        | 0.6205                | 0.020673    | up                      |
| ENSGALG000000013218 | C3AR       | 73.1992                            | 44.1166                        | 0.7305                | 0.0229212   | up                      |
| ENSGALG000000013112 | RERGL      | 102.7280                           | 43.9204                        | 1.2259                | 0.00152603  | up                      |
| ENSGALG00000002829  | SCARF1     | 70.3520                            | 41.5145                        | 0.7610                | 0.010168    | up                      |
| ENSGALG00000023655  | novel gene | 81.7476                            | 41.0600                        | 0.9934                | 0.0216881   | up                      |
| ENSGALG00000016292  | COL21A1    | 77.6023                            | 40.2982                        | 0.9454                | 0.000154369 | up                      |
| ENSGALG000000023948 | novel gene | 148.8730                           | 37.2186                        | 2.0000                | 6.48E-09    | up                      |
| ENSGALG00000009641  | COL1A2     | 60.9794                            | 37.0589                        | 0.7185                | 0.000583141 | up                      |
| ENSGALG00000009626  | THBS1      | 71.0634                            | 36.2270                        | 0.9720                | 7.06E-05    | up                      |
| ENSGALG00000003876  | TIMD4      | 85.5456                            | 34.7797                        | 1.2984                | 8.53E-07    | up                      |
| ENSGALG00000012504  | NGFR       | 92.3428                            | 30.1858                        | 1.6131                | 0.000261887 | up                      |
| ENSGALG000000008757 | CNRIP1     | 56.1778                            | 29.0769                        | 0.9501                | 0.0451103   | up                      |
| ENSGALG000000008593 | ATP1B4     | 49.2532                            | 24.0850                        | 1.0321                | 0.00184808  | up                      |
| ENSGALG00000005554  | ADIPOQ     | 42.1221                            | 22.6908                        | 0.8925                | 0.0196632   | up                      |
| ENSGALG00000023528  | EDN3       | 51.7529                            | 21.1925                        | 1.2881                | 0.00273177  | up                      |
| ENSGALG00000002452  | AQP3       | 61.3798                            | 20.9872                        | 1.5483                | 2.72E-06    | up                      |
| ENSGALG000000008293 | novel gene | 35.5933                            | 19.8467                        | 0.8427                | 0.00663609  | up                      |
| ENSGALG000000015001 | LAMA4      | 31.0764                            | 18.3277                        | 0.7618                | 0.0072436   | up                      |
| ENSGALG00000006563  | SEM3D      | 47.0204                            | 17.9789                        | 1.3870                | 2.49E-07    | up                      |
| ENSGALG00000010857  | DAB1       | 28.7618                            | 16.1637                        | 0.8314                | 0.0087455   | up                      |
| ENSGALG00000022907  | novel gene | 53.9263                            | 15.3990                        | 1.8082                | 0.0243658   | up                      |
| ENSGALG00000016195  | COL22A1    | 33.0758                            | 14.9105                        | 1.1494                | 5.32E-06    | up                      |
| ENSGALG000000017393 | PKDCC      | 32.4038                            | 14.8473                        | 1.1260                | 0.0140127   | up                      |
| ENSGALG000000022805 | novel gene | 48.7130                            | 14.6226                        | 1.7361                | 5.99E-06    | up                      |
| ENSGALG00000006802  | LAMB2      | 23.9391                            | 14.3548                        | 0.7378                | 0.00904055  | up                      |
| ENSGALG00000006172  | ABCC8      | 22.3122                            | 12.7909                        | 0.8027                | 0.0130886   | up                      |
| ENSGALG00000013244  | ABCC9      | 23.0500                            | 12.1752                        | 0.9208                | 0.00175913  | up                      |
| ENSGALG000000016411 | COL14A1    | 22.9032                            | 11.4089                        | 1.0054                | 0.0120618   | up                      |
| ENSGALG000000008367 | MDK        | 30.1305                            | 10.5791                        | 1.5100                | 0.00347449  | up                      |
| ENSGALG000000008735 | BFSP1      | 27.1123                            | 10.4658                        | 1.3733                | 1.62E-05    | up                      |
| ENSGALG000000010566 | NPNT       | 25.4981                            | 10.4204                        | 1.2910                | 0.00199284  | up                      |

|                    |            |          |           |              |             |      |
|--------------------|------------|----------|-----------|--------------|-------------|------|
| ENSGALG00000014835 | C7         | 18.4332  | 9.6819    | 0.9289       | 0.0247254   | up   |
| ENSGALG00000014815 | EMILIN2    | 19.2061  | 9.6800    | 0.9885       | 0.0110264   | up   |
| ENSGALG00000007222 | UTS2D      | 39.5212  | 9.4812    | 2.0595       | 2.07E-06    | up   |
| ENSGALG00000015123 | ZDHHC23    | 21.5787  | 9.2607    | 1.2204       | 9.77E-06    | up   |
| ENSGALG00000011078 | PTPN13     | 16.9784  | 8.0240    | 1.0813       | 1.98E-05    | up   |
| ENSGALG00000010680 | TTC7B      | 14.8870  | 7.6635    | 0.9580       | 0.0265443   | up   |
| ENSGALG00000009429 | RXFP1      | 17.4894  | 6.8248    | 1.3576       | 0.000914608 | up   |
| ENSGALG00000016511 | GPR64      | 18.6512  | 6.7716    | 1.4617       | 9.47E-05    | up   |
| ENSGALG00000007617 | ANO1       | 14.7669  | 6.7381    | 1.1319       | 0.00836706  | up   |
| ENSGALG00000016575 | GPM6B      | 16.9083  | 6.6464    | 1.3471       | 0.0143089   | up   |
| ENSGALG00000006705 | MYOF       | 13.0386  | 6.6121    | 0.9796       | 0.00106217  | up   |
| ENSGALG00000002757 | novel gene | 25.2330  | 6.1487    | 2.0370       | 0.00292304  | up   |
| ENSGALG00000000994 | RAB42      | 23.0524  | 6.1191    | 1.9135       | 0.00377855  | up   |
| ENSGALG00000005024 | CCDC48     | 14.7045  | 5.5798    | 1.3980       | 0.0251733   | up   |
| ENSGALG00000015966 | CTNNA2     | 13.1785  | 4.9792    | 1.4042       | 0.00190025  | up   |
| ENSGALG00000012083 | GPR141     | 14.8779  | 4.4127    | 1.7534       | 0.00901941  | up   |
| ENSGALG00000017166 | RAB39A     | 15.8065  | 4.0366    | 1.9693       | 0.0203131   | up   |
| ENSGALG00000016220 | WISP1      | 15.6804  | 3.3687    | 2.2187       | 6.44E-05    | up   |
| ENSGALG00000010152 | TSPAN8     | 13.7763  | 3.3329    | 2.0473       | 0.00136607  | up   |
| ENSGALG00000008509 | SEMA3E     | 13.1018  | 3.0001    | 2.1267       | 7.69E-07    | up   |
| ENSGALG00000020151 | NMU        | 12.4426  | 2.6840    | 2.2128       | 0.00170001  | up   |
| ENSGALG00000000827 | SF3A2      | 138.2250 | 0.0000    | 1.79769e+308 | 1.21E-09    | up   |
| ENSGALG00000014922 | ROCK1      | 69.1777  | 0.0000    | 1.79769e+308 | 2.67E-24    | up   |
| ENSGALG00000024367 | novel gene | 47.0575  | 0.0000    | 1.79769e+308 | 1.87E-08    | up   |
| ENSGALG00000007512 | MORC2      | 33.9424  | 0.0000    | 1.79769e+308 | 5.32E-23    | up   |
| ENSGALG00000021247 | CNEP1R1    | 33.8189  | 0.0000    | 1.79769e+308 | 0.00288836  | up   |
| ENSGALG00000024167 | ISG20L2    | 22.5787  | 0.0000    | 1.79769e+308 | 1.24E-07    | up   |
| ENSGALG00000003874 | HEATR3     | 22.1763  | 0.0000    | 1.79769e+308 | 2.63E-16    | up   |
| ENSGALG00000002496 | LL         | 11.4608  | 0.0000    | 1.79769e+308 | 0.000322686 | up   |
| ENSGALG00000007468 | HBAA       | 652.7320 | 6803.1000 | -3.3816      | 0           | down |
| ENSGALG00000017345 | HBG1       | 675.7900 | 6346.2000 | -3.2312      | 0           | down |
| ENSGALG00000007463 | HBAD       | 165.4300 | 3322.7900 | -4.3281      | 0           | down |
| ENSGALG00000022703 | HBG2       | 118.3530 | 1015.5600 | -3.1011      | 0           | down |
| ENSGALG00000003196 | ANG        | 444.1060 | 995.9640  | -1.1652      | 1.82E-10    | down |
| ENSGALG00000016152 | LY6E       | 399.6370 | 719.0530  | -0.8474      | 0.00299017  | down |
| ENSGALG00000013575 | ISG12-2    | 193.5610 | 716.6120  | -1.8884      | 0           | down |
| ENSGALG00000005946 | novel gene | 238.8340 | 438.9510  | -0.8781      | 0.0444808   | down |
| ENSGALG00000007651 | STAT1      | 204.7630 | 424.8880  | -1.0531      | 3.26E-06    | down |
| ENSGALG00000016829 | LAMP1      | 218.6680 | 328.0010  | -0.5850      | 0.014471    | down |
| ENSGALG00000015862 | CA2        | 62.5318  | 314.6100  | -2.3309      | 0           | down |
| ENSGALG00000002902 | novel gene | 174.3750 | 303.5410  | -0.7997      | 0.00298581  | down |
| ENSGALG00000006384 | IFIT5      | 68.8033  | 289.7040  | -2.0740      | 0           | down |
| ENSGALG00000006785 | IRF1       | 187.6750 | 283.5330  | -0.5953      | 0.0194019   | down |
| ENSGALG00000008835 | SAMD13     | 200.0570 | 278.0830  | -0.4751      | 0.0451103   | down |
| ENSGALG00000010811 | LGMN       | 167.4380 | 265.7650  | -0.6665      | 0.0324755   | down |
| ENSGALG00000023370 | novel gene | 125.0920 | 260.2930  | -1.0571      | 0.0220731   | down |
| ENSGALG00000012610 | CTSL2      | 134.3080 | 254.6710  | -0.9231      | 2.34E-07    | down |
| ENSGALG00000017186 | BIRC2      | 147.5700 | 247.7530  | -0.7475      | 8.34E-05    | down |
| ENSGALG00000012357 | CXCR4      | 133.0090 | 243.9030  | -0.8748      | 0.000633073 | down |
| ENSGALG00000012313 | H1FO       | 112.5720 | 218.2920  | -0.9554      | 0.00377855  | down |
| ENSGALG00000021627 | IFI27L2    | 72.3068  | 217.0710  | -1.5860      | 2.12E-06    | down |
| ENSGALG00000011826 | PLBD1      | 86.9448  | 153.7670  | -0.8226      | 0.00199253  | down |
| ENSGALG00000015440 | RCSD1      | 100.7590 | 153.2840  | -0.6053      | 0.040992    | down |
| ENSGALG00000006378 | LIPA       | 95.9460  | 152.1700  | -0.6654      | 0.0268453   | down |
| ENSGALG00000012072 | PARP15     | 80.3501  | 134.4480  | -0.7427      | 0.0213684   | down |
| ENSGALG0000001629  | LOC417345  | 78.4619  | 133.9960  | -0.7721      | 0.0115828   | down |
| ENSGALG00000012784 | TXNDC5     | 79.2419  | 128.4070  | -0.6964      | 0.0159887   | down |
| ENSGALG00000011153 | LY75       | 78.0323  | 114.8420  | -0.5575      | 0.00747925  | down |
| ENSGALG00000003597 | AK2        | 63.2963  | 108.7230  | -0.7805      | 0.0141272   | down |
| ENSGALG00000000720 | GBP7       | 66.3665  | 107.1940  | -0.6917      | 0.0180635   | down |
| ENSGALG00000010476 | BNIP3      | 59.8149  | 105.0390  | -0.8123      | 0.0103493   | down |
| ENSGALG00000002329 | CCL1       | 47.6414  | 103.4110  | -1.1181      | 0.0206325   | down |
| ENSGALG00000019795 | novel gene | 38.1212  | 102.2540  | -1.4235      | 7.59E-06    | down |
| ENSGALG00000008257 | MERTK      | 55.3470  | 100.0430  | -0.8540      | 0.000721104 | down |
| ENSGALG00000014477 | CD4        | 55.0231  | 98.3413   | -0.8378      | 0.00103327  | down |
| ENSGALG00000002549 | RGS1       | 52.0715  | 96.0099   | -0.8827      | 0.00837528  | down |
| ENSGALG00000012480 | NMI        | 56.2541  | 94.0707   | -0.7418      | 0.0215854   | down |

|                     |            |         |         |               |             |      |
|---------------------|------------|---------|---------|---------------|-------------|------|
| ENSGALG0000006351   | FAS        | 60.1003 | 92.4175 | -0.6208       | 0.0276367   | down |
| ENSGALG0000004614   | NPL        | 38.4291 | 92.2258 | -1.2630       | 2.53E-06    | down |
| ENSGALG0000002783   | SLC43A2    | 41.6474 | 91.7330 | -1.1392       | 6.60E-06    | down |
| ENSGALG0000003584   | KPNA2      | 51.9748 | 90.9272 | -0.8069       | 0.00403041  | down |
| ENSGALG0000004859   | ZNFX1      | 37.3040 | 89.2360 | -1.2583       | 7.71E-08    | down |
| ENSGALG00000016173  | UBASH3A    | 57.4399 | 86.5401 | -0.5913       | 0.0224748   | down |
| ENSGALG0000001558   | MOV10      | 45.8631 | 81.4093 | -0.8279       | 0.00212864  | down |
| ENSGALG00000019141  | LYG2       | 12.4333 | 81.3108 | -2.7092       | 8.63E-12    | down |
| ENSGALG00000024350  | novel gene | 35.7806 | 80.8050 | -1.1753       | 0.000583141 | down |
| ENSGALG00000014811  | SMCHD1     | 59.2765 | 80.5103 | -0.4417       | 0.040992    | down |
| ENSGALG00000016099  | novel gene | 40.1436 | 79.5881 | -0.9874       | 0.0233684   | down |
| ENSGALG0000007447   | TUBB1      | 25.7398 | 79.5080 | -1.6271       | 3.48E-12    | down |
| ENSGALG00000016964  | EPSTI1     | 33.9334 | 79.1987 | -1.2228       | 0.000721499 | down |
| ENSGALG00000006425  | SLC6A6     | 50.6603 | 78.9541 | -0.6402       | 0.0442082   | down |
| ENSGALG00000016142  | MX1        | 9.4955  | 74.9547 | -2.9807       | 0           | down |
| ENSGALG00000013057  | USP18      | 25.9695 | 74.6632 | -1.5236       | 5.33E-10    | down |
| ENSGALG0000006988   | RNF213     | 30.9880 | 70.4357 | -1.1846       | 1.51E-05    | down |
| ENSGALG00000011733  | CCR2       | 36.8635 | 68.5709 | -0.8954       | 0.0256369   | down |
| ENSGALG00000013101  | novel gene | 17.8322 | 68.2274 | -1.9359       | 3.83E-11    | down |
| ENSGALG00000016398  | CMPK2      | 13.2637 | 67.3130 | -2.3434       | 1.47E-05    | down |
| ENSGALG00000009240  | NFE2L2     | 40.7554 | 63.9418 | -0.6498       | 0.0194306   | down |
| ENSGALG00000010629  | ZCCHC11    | 36.7354 | 62.2242 | -0.7603       | 0.00521562  | down |
| ENSGALG00000020220  | novel gene | 16.6433 | 61.9700 | -1.8966       | 3.05E-07    | down |
| ENSGALG0000002431   | CFH        | 40.0538 | 61.5802 | -0.6205       | 0.0449451   | down |
| ENSGALG00000016721  | PLCXD1     | 27.0898 | 61.1129 | -1.1737       | 0.000339995 | down |
| ENSGALG00000009479  | SAMD9L     | 15.1032 | 61.0749 | -2.0157       | 0           | down |
| ENSGALG00000020219  | novel gene | 15.3669 | 60.6152 | -1.9799       | 5.33E-10    | down |
| ENSGALG00000021393  | novel gene | 22.8198 | 60.1176 | -1.3975       | 0.000119819 | down |
| ENSGALG00000011955  | CX3CR1     | 29.6454 | 57.9316 | -0.9665       | 0.0233638   | down |
| ENSGALG00000012830  | IRF4       | 37.9190 | 57.3401 | -0.5966       | 0.0488699   | down |
| ENSGALG00000015712  | SLBP       | 22.2286 | 55.0994 | -1.3096       | 1.66E-05    | down |
| ENSGALG00000015900  | novel gene | 7.7437  | 54.7825 | -2.8226       | 9.67E-06    | down |
| ENSGALG00000014453  | FAM46C     | 17.9314 | 54.3440 | -1.5996       | 1.03E-05    | down |
| ENSGALG00000011089  | IFIH1      | 25.6737 | 54.0603 | -1.0743       | 0.000119819 | down |
| ENSGALG00000012173  | LGALS3     | 25.8387 | 53.9854 | -1.0630       | 0.010168    | down |
| ENSGALG00000004727  | ULK2       | 29.0352 | 53.3217 | -0.8769       | 0.00103315  | down |
| ENSGALG00000013911  | ZC3HAV1    | 30.5611 | 51.9723 | -0.7660       | 0.00521562  | down |
| ENSGALG00000021467  | CX3CL1     | 20.8852 | 51.5959 | -1.3048       | 0.0025114   | down |
| ENSGALG00000008621  | NRP2       | 33.5538 | 51.5064 | -0.6183       | 0.0143089   | down |
| ENSGALG00000006126  | COL6A2     | 27.5564 | 50.7635 | -0.8814       | 0.000810331 | down |
| ENSGALG00000012057  | TRANK1     | 22.5373 | 50.0981 | -1.1524       | 9.02E-07    | down |
| ENSGALG00000007485  | TFRC       | 26.5740 | 49.2362 | -0.8897       | 0.00387048  | down |
| ENSGALG00000010149  | FTSJ2      | 25.3941 | 48.9693 | -0.9474       | 0.00174196  | down |
| ENSGALG0000001561   | MXRA8      | 27.8420 | 48.3847 | -0.7973       | 0.0191329   | down |
| ENSGALG00000003578  | FN1        | 16.9758 | 47.2428 | -1.4766       | 4.30E-12    | down |
| ENSGALG00000003527  | ARRDC2     | 25.5533 | 46.8829 | -0.8756       | 0.0136235   | down |
| ENSGALG00000001395  | novel gene | 17.1639 | 46.8281 | -1.4480       | 0.0180725   | down |
| ENSGALG00000011798  | HEBP1      | 24.5871 | 45.9593 | -0.9025       | 0.00219329  | down |
| ENSGALG00000004728  | RGL1       | 30.3201 | 45.7610 | -0.5938       | 0.0363964   | down |
| ENSGALG00000014127  | TXK        | 25.4733 | 44.9575 | -0.8196       | 0.0454993   | down |
| ENSGALG00000017302  | SLCO2B1    | 26.1008 | 44.9451 | -0.7841       | 0.0323507   | down |
| ENSGALG00000008666  | CTLA4      | 17.8859 | 44.5663 | -1.3171       | 0.00578906  | down |
| ENSGALG00000016786  | IL18R1     | 22.0173 | 44.3116 | -1.0090       | 0.00283805  | down |
| ENSGALG00000006267  | TPX2       | 25.8939 | 44.2807 | -0.7741       | 0.0159887   | down |
| ENSGALG00000016399  | SNTB1      | 23.4159 | 43.1244 | -0.8810       | 7.60E-05    | down |
| ENSGALG00000003212  | TSPO2      | 4.4931  | 42.8168 | -3.2524       | 5.80E-12    | down |
| ENSGALG00000008839  | ATP11B     | 0.0000  | 42.3410 | -1.79769e+308 | 1.68E-30    | down |
| ENSGALG000000021226 | novel gene | 17.0353 | 42.2756 | -1.3113       | 0.00415409  | down |
| ENSGALG00000010560  | EIF2AK2    | 23.2727 | 42.1265 | -0.8561       | 0.00496684  | down |
| ENSGALG00000011046  | SNX10      | 25.6699 | 41.7870 | -0.7030       | 0.0348776   | down |
| ENSGALG00000008669  | CD28       | 19.0690 | 40.5967 | -1.0901       | 0.0174143   | down |
| ENSGALG00000005974  | COL6A1     | 17.3967 | 40.0782 | -1.2040       | 8.24E-07    | down |
| ENSGALG00000003144  | TRIM25     | 20.7429 | 39.1480 | -0.9163       | 0.0249714   | down |
| ENSGALG00000004205  | SOAT1      | 21.5510 | 38.7060 | -0.8448       | 0.0301956   | down |
| ENSGALG00000001882  | TNFRSF18   | 22.0424 | 38.1007 | -0.7895       | 0.0156132   | down |
| ENSGALG00000006489  | CHCHD3     | 0.0000  | 38.0321 | -1.79769e+308 | 1.81E-07    | down |
| ENSGALG00000011149  | PLA2R1     | 18.8651 | 37.6376 | -0.9965       | 8.34E-05    | down |

|                     |            |         |         |               |             |      |
|---------------------|------------|---------|---------|---------------|-------------|------|
| ENSGALG00000014658  | ARRDC3     | 18.2535 | 37.0040 | -1.0195       | 0.0176332   | down |
| ENSGALG00000015433  | ABCA1      | 18.4027 | 36.8680 | -1.0025       | 3.26E-06    | down |
| ENSGALG00000005845  | SLC7A5     | 18.1089 | 34.8630 | -0.9450       | 0.000280909 | down |
| ENSGALG00000005022  | GP9        | 12.2173 | 34.0696 | -1.4796       | 0.0243095   | down |
| ENSGALG00000016400  | RSAD2      | 5.9696  | 33.9855 | -2.5092       | 7.71E-08    | down |
| ENSGALG00000013993  | VNN1       | 13.0623 | 33.0309 | -1.3384       | 0.000247969 | down |
| ENSGALG00000003701  | SGMS1      | 0.0000  | 32.1293 | -1.79769e+308 | 2.75E-15    | down |
| ENSGALG00000013548  | GZMA       | 15.9436 | 31.8832 | -0.9998       | 0.0340161   | down |
| ENSGALG00000015681  | novel gene | 17.7092 | 31.1504 | -0.8148       | 0.013859    | down |
| ENSGALG00000023373  | novel gene | 9.7616  | 31.0929 | -1.6714       | 0.000938031 | down |
| ENSGALG00000005321  | LAMA5      | 15.5551 | 30.0344 | -0.9492       | 0.000119819 | down |
| ENSGALG00000014716  | IL6ST      | 17.0215 | 29.8613 | -0.8109       | 0.0273944   | down |
| ENSGALG00000003920  | OCLR       | 0.0000  | 28.6494 | -1.79769e+308 | 1.22E-20    | down |
| ENSGALG00000019609  | TRANK1     | 8.5833  | 27.8523 | -1.6982       | 0.00880009  | down |
| ENSGALG00000006110  | PLK1       | 15.2651 | 27.4533 | -0.8467       | 0.035588    | down |
| ENSGALG00000003288  | TARS       | 0.0000  | 27.1526 | -1.79769e+308 | 9.47E-20    | down |
| ENSGALG00000007113  | TNC        | 17.6498 | 27.1388 | -0.6207       | 0.0213684   | down |
| ENSGALG00000002445  | KIAA0319L  | 0.0000  | 26.6076 | -1.79769e+308 | 1.46E-24    | down |
| ENSGALG00000006790  | KIF11      | 15.1507 | 26.2100 | -0.7907       | 0.0213877   | down |
| ENSGALG00000000873  | GGA.47157  | 8.9190  | 26.1112 | -1.5497       | 0.0110054   | down |
| ENSGALG00000009728  | SLC25A13   | 0.0000  | 25.8201 | -1.79769e+308 | 3.49E-22    | down |
| ENSGALG00000002099  | PFKFB4     | 10.5021 | 25.4462 | -1.2768       | 0.00663609  | down |
| ENSGALG00000015820  | CA13       | 6.6992  | 25.3456 | -1.9197       | 0.000771485 | down |
| ENSGALG00000016651  | TDH        | 7.7877  | 24.1951 | -1.6355       | 0.000220576 | down |
| ENSGALG00000012484  | RIF1       | 16.1349 | 24.1276 | -0.5805       | 0.029507    | down |
| ENSGALG00000006138  | HELZ2      | 10.2135 | 22.8046 | -1.1588       | 3.71E-06    | down |
| ENSGALG00000007575  | PPP4R1L    | 0.0000  | 22.2140 | -1.79769e+308 | 3.57E-22    | down |
| ENSGALG00000010649  | CNST       | 10.6520 | 22.0176 | -1.0475       | 0.0192507   | down |
| ENSGALG00000004468  | FAM82A2    | 0.0000  | 20.2770 | -1.79769e+308 | 2.38E-11    | down |
| ENSGALG00000001215  | RHD        | 5.6708  | 19.3345 | -1.7696       | 0.00111812  | down |
| ENSGALG00000012404  | ERO1L      | 0.0000  | 18.8391 | -1.79769e+308 | 8.62E-12    | down |
| ENSGALG00000006236  | TPH1       | 4.7709  | 18.5534 | -1.9593       | 6.44E-05    | down |
| ENSGALG00000011954  | CCR8       | 7.2410  | 18.4534 | -1.3496       | 0.00121925  | down |
| ENSGALG00000019325  | novel gene | 7.3833  | 18.4047 | -1.3177       | 0.040992    | down |
| ENSGALG00000010961  | IGF2BP     | 10.5746 | 18.0823 | -0.7740       | 0.0410446   | down |
| ENSGALG00000014935  | GREB1L     | 8.2978  | 17.7147 | -1.0942       | 0.00017672  | down |
| ENSGALG00000014236  | ATP8A1     | 9.6803  | 17.1941 | -0.8288       | 0.040992    | down |
| ENSGALG00000023815  | novel gene | 5.3362  | 17.1379 | -1.6833       | 0.0437163   | down |
| ENSGALG00000016324  | GSTA3      | 3.9687  | 16.6754 | -2.0710       | 0.00149743  | down |
| ENSGALG00000022693  | novel gene | 3.1675  | 15.8860 | -2.3263       | 0.00209185  | down |
| ENSGALG00000001233  | RHD        | 4.9137  | 15.8336 | -1.6881       | 0.0079315   | down |
| ENSGALG00000002630  | ZNF76      | 0.0000  | 15.6108 | -1.79769e+308 | 2.92E-12    | down |
| ENSGALG00000005792  | ABCG2      | 0.0000  | 15.5463 | -1.79769e+308 | 2.51E-12    | down |
| ENSGALG00000014722  | LOC769174  | 4.8064  | 15.2419 | -1.6650       | 0.0335174   | down |
| ENSGALG00000009639  | DDX60      | 2.0675  | 14.6679 | -2.8267       | 2.21E-13    | down |
| ENSGALG00000000378  | SLC25A37   | 3.5735  | 14.2619 | -1.9968       | 0.0020994   | down |
| ENSGALG000000024352 | novel gene | 3.0905  | 14.1275 | -2.1926       | 0.00996502  | down |
| ENSGALG00000016785  | IL1RL1     | 5.4756  | 13.7486 | -1.3282       | 0.0196632   | down |
| ENSGALG00000016684  | RHAG       | 1.2640  | 13.5782 | -3.4252       | 2.31E-08    | down |
| ENSGALG00000009552  | novel gene | 4.4956  | 12.7339 | -1.5021       | 0.0268453   | down |
| ENSGALG00000003386  | SPTB       | 1.6386  | 12.5656 | -2.9389       | 0           | down |
| ENSGALG00000002338  | ASPM       | 6.6821  | 12.0420 | -0.8497       | 0.0256369   | down |
| ENSGALG00000015469  | IGSF3      | 5.9140  | 11.6918 | -0.9833       | 0.0449451   | down |
| ENSGALG00000016788  | IL18RAP    | 4.3968  | 10.8898 | -1.3084       | 0.0478141   | down |
| ENSGALG00000020444  | novel gene | 2.8743  | 10.6854 | -1.8944       | 0.0484265   | down |
| ENSGALG00000010158  | KANK1      | 4.8537  | 10.5986 | -1.1267       | 0.010168    | down |
| ENSGALG00000009700  | PDK4       | 1.9545  | 10.1462 | -2.3761       | 0.000218755 | down |

"up" means miRNA was up-regulated in ALV-J infected compared to uninfected chicken spleens.

"down" means miRNA was down-regulated in ALV-J infected compared to uninfected chicken spleens.

Table S3. Differentially expressed miRNAs and their corresponding target genes with differential expression in AVL-J infected compared with uninfected chicken spleens.

| miRNA-name      | ALV-J infected spleens (WRR+) FPKM | Uninfected spleens (WRR-) FPKM | q value     | Gene-name | ALV-J infected spleens (WRR+) FPKM | Uninfected spleens (WRR-) FPKM | q value     | Correlation <sup>a</sup> |
|-----------------|------------------------------------|--------------------------------|-------------|-----------|------------------------------------|--------------------------------|-------------|--------------------------|
| gga-miR-194     | 176.7                              | 412.96                         | 9.89E-24    | HSP90AA1  | 1016.75                            | 616.806                        | 0.0125173   | Negative                 |
| gga-miR-1329-5p | 371.07                             | 619.44                         | 2.15E-16    | HSP90AA1  | 1016.75                            | 616.806                        | 0.0125173   | Negative                 |
| gga-miR-20b     | 20880.03                           | 23599.8                        | 7.61E-56    | CKB       | 200.702                            | 139.093                        | 0.0422742   | Negative                 |
| gga-miR-1458    | 29.45                              | 68.83                          | 8.01E-05    | SPIC      | 337.923                            | 129.849                        | 6.11E-09    | Negative                 |
| gga-miR-130c-3p | 99411.32                           | 101679.48                      | 3.40E-29    | MYH11     | 145.901                            | 99.5936                        | 0.000114137 | Negative                 |
| gga-miR-130a    | 91129.99                           | 93596.21                       | 2.70E-31    | MYH11     | 145.901                            | 99.5936                        | 0.000114137 | Negative                 |
| gga-miR-454-3p  | 25474.23                           | 26024.01                       | 6.52E-08    | MYH11     | 145.901                            | 99.5936                        | 0.000114137 | Negative                 |
| gga-miR-1769-3p | 965.96                             | 1537.12                        | 2.70E-33    | MYH11     | 145.901                            | 99.5936                        | 0.000114137 | Negative                 |
| gga-miR-1699    | 0                                  | 15.29                          | 0.000124084 | MYH11     | 145.901                            | 99.5936                        | 0.000114137 | Negative                 |
| gga-miR-1587    | 0                                  | 15.29                          | 0.000124084 | CSRP1     | 147.78                             | 94.9176                        | 0.0470582   | Negative                 |
| gga-miR-15b     | 159029.84                          | 161443.71                      | 1.32E-33    | CSRP1     | 147.78                             | 94.9176                        | 0.0470582   | Negative                 |
| gga-miR-16c     | 28083.49                           | 29151.79                       | 1.86E-14    | CSRP1     | 147.78                             | 94.9176                        | 0.0470582   | Negative                 |
| gga-miR-16      | 229821.69                          | 230208.89                      | 2.43E-23    | CSRP1     | 147.78                             | 94.9176                        | 0.0470582   | Negative                 |
| gga-miR-138     | 530.1                              | 650.03                         | 0.000170237 | CSRP1     | 147.78                             | 94.9176                        | 0.0470582   | Negative                 |
| gga-miR-1585    | 0                                  | 15.29                          | 0.000124084 | CSRP1     | 147.78                             | 94.9176                        | 0.0470582   | Negative                 |
| gga-miR-1668-3p | 53.01                              | 114.71                         | 1.65E-06    | CSRP1     | 147.78                             | 94.9176                        | 0.0470582   | Negative                 |
| gga-miR-138     | 530.1                              | 650.03                         | 0.000170237 | SREBF2    | 154.914                            | 93.3359                        | 0.00118533  | Negative                 |
| gga-miR-20b     | 20880.03                           | 23599.8                        | 7.61E-56    | PTGS2     | 80.0275                            | 51.021                         | 0.027382    | Negative                 |
| gga-miR-215     | 4894.59                            | 6546.15                        | 1.07E-63    | PTGS2     | 80.0275                            | 51.021                         | 0.027382    | Negative                 |
| gga-miR-30e     | 2745756.28                         | 2781204.55                     | 0           | DPYSL2    | 69.437                             | 45.1659                        | 0.020673    | Negative                 |
| gga-miR-144     | 33785.01                           | 56537.03                       | 0           | RERGL     | 102.728                            | 43.9204                        | 0.00152603  | Negative                 |
| gga-miR-19a     | 234463                             | 235546.76                      | 1.63E-28    | THBS1     | 71.0634                            | 36.227                         | 7.06E-05    | Negative                 |
| gga-miR-1458    | 29.45                              | 68.83                          | 8.01E-05    | THBS1     | 71.0634                            | 36.227                         | 7.06E-05    | Negative                 |
| gga-miR-144     | 33785.01                           | 56537.03                       | 0           | THBS1     | 71.0634                            | 36.227                         | 7.06E-05    | Negative                 |
| gga-miR-19b     | 246119.3                           | 249258.5                       | 5.42E-46    | THBS1     | 71.0634                            | 36.227                         | 7.06E-05    | Negative                 |
| gga-miR-18a     | 9088.26                            | 9444.51                        | 1.63E-05    | THBS1     | 71.0634                            | 36.227                         | 7.06E-05    | Negative                 |
| gga-miR-18b     | 8446.25                            | 8832.72                        | 4.71E-06    | THBS1     | 71.0634                            | 36.227                         | 7.06E-05    | Negative                 |
| gga-miR-3536    | 58.9                               | 152.95                         | 4.53E-11    | TMD4      | 85.5456                            | 34.7797                        | 8.53E-07    | Negative                 |
| gga-miR-1769-3p | 965.96                             | 1537.12                        | 2.70E-33    | NGFR      | 92.3428                            | 30.1858                        | 0.000261887 | Negative                 |
| gga-miR-133a    | 17092.76                           | 18384.29                       | 9.06E-21    | NGFR      | 92.3428                            | 30.1858                        | 0.000261887 | Negative                 |
| gga-miR-133c    | 15690.94                           | 16984.82                       | 1.41E-21    | NGFR      | 92.3428                            | 30.1858                        | 0.000261887 | Negative                 |
| gga-miR-133b    | 15514.24                           | 16694.22                       | 3.94E-19    | NGFR      | 92.3428                            | 30.1858                        | 0.000261887 | Negative                 |
| gga-miR-1698    | 23.56                              | 61.18                          | 4.80E-05    | NGFR      | 92.3428                            | 30.1858                        | 0.000261887 | Negative                 |
| gga-miR-1587    | 0                                  | 15.29                          | 0.000124084 | NGFR      | 92.3428                            | 30.1858                        | 0.000261887 | Negative                 |
| gga-miR-140-3p  | 455396.68                          | 486181.79                      | 0           | CNRIP1    | 56.1778                            | 29.0769                        | 0.0451103   | Negative                 |
| gga-miR-144     | 33785.01                           | 56537.03                       | 0           | CNRIP1    | 56.1778                            | 29.0769                        | 0.0451103   | Negative                 |
| gga-miR-490     | 907.06                             | 1124.16                        | 1.54E-07    | CNRIP1    | 56.1778                            | 29.0769                        | 0.0451103   | Negative                 |
| gga-miR-1626-5p | 0                                  | 15.29                          | 0.000124084 | ATPIB4    | 49.2532                            | 24.085                         | 0.00184808  | Negative                 |
| gga-miR-3536    | 58.9                               | 152.95                         | 4.53E-11    | EDN3      | 51.7529                            | 21.1925                        | 0.00273177  | Negative                 |
| gga-miR-1452    | 0                                  | 22.94                          | 1.53E-06    | LAMA4     | 31.0764                            | 18.3277                        | 0.0072436   | Negative                 |
| gga-miR-30e     | 2745756.28                         | 2781204.55                     | 0           | LAMA4     | 31.0764                            | 18.3277                        | 0.0072436   | Negative                 |
| gga-miR-99a-5p  | 357275.27                          | 377030.82                      | 8.16E-270   | DAB1      | 28.7618                            | 16.1637                        | 0.0087455   | Negative                 |
| gga-miR-100     | 494105.73                          | 518881.96                      | 0           | DAB1      | 28.7618                            | 16.1637                        | 0.0087455   | Negative                 |
| gga-miR-15b     | 159029.84                          | 161443.71                      | 1.32E-33    | DAB1      | 28.7618                            | 16.1637                        | 0.0087455   | Negative                 |
| gga-miR-16      | 229821.69                          | 230208.89                      | 2.43E-23    | DAB1      | 28.7618                            | 16.1637                        | 0.0087455   | Negative                 |
| gga-miR-16c     | 28083.49                           | 29151.79                       | 1.86E-14    | DAB1      | 28.7618                            | 16.1637                        | 0.0087455   | Negative                 |
| gga-miR-490     | 907.06                             | 1124.16                        | 1.54E-07    | DAB1      | 28.7618                            | 16.1637                        | 0.0087455   | Negative                 |
| gga-miR-456     | 51926.19                           | 58754.77                       | 3.07E-139   | COL22A1   | 33.0758                            | 14.9105                        | 5.32E-06    | Negative                 |
| gga-miR-15b     | 159029.84                          | 161443.71                      | 1.32E-33    | PKDCC     | 32.4038                            | 14.8473                        | 0.0140127   | Negative                 |
| gga-miR-16      | 229821.69                          | 230208.89                      | 2.43E-23    | PKDCC     | 32.4038                            | 14.8473                        | 0.0140127   | Negative                 |
| gga-miR-16c     | 28083.49                           | 29151.79                       | 1.86E-14    | PKDCC     | 32.4038                            | 14.8473                        | 0.0140127   | Negative                 |
| gga-miR-9-3p    | 117.8                              | 565.91                         | 9.06E-73    | ABCC8     | 22.3122                            | 12.7909                        | 0.0130886   | Negative                 |
| gga-miR-155     | 121828.64                          | 168379.88                      | 0           | ABCC8     | 22.3122                            | 12.7909                        | 0.0130886   | Negative                 |
| gga-miR-1769-3p | 965.96                             | 1537.12                        | 2.70E-33    | ABCC9     | 23.05                              | 12.1752                        | 0.00175913  | Negative                 |
| gga-miR-1699    | 0                                  | 15.29                          | 0.000124084 | MDK       | 30.1305                            | 10.5791                        | 0.00347449  | Negative                 |
| gga-miR-1585    | 0                                  | 15.29                          | 0.000124084 | BFS1      | 27.1123                            | 10.4658                        | 1.62E-05    | Negative                 |
| gga-miR-215     | 4894.59                            | 6546.15                        | 1.07E-63    | C7        | 18.4332                            | 9.68193                        | 0.0247254   | Negative                 |
| gga-miR-130c-3p | 99411.32                           | 101679.48                      | 3.40E-29    | ZDHHC23   | 21.5787                            | 9.26066                        | 9.77E-06    | Negative                 |
| gga-miR-130a    | 91129.99                           | 93596.21                       | 2.70E-31    | ZDHHC23   | 21.5787                            | 9.26066                        | 9.77E-06    | Negative                 |
| gga-miR-454-3p  | 25474.23                           | 26024.01                       | 6.52E-08    | ZDHHC23   | 21.5787                            | 9.26066                        | 9.77E-06    | Negative                 |
| gga-miR-19a     | 234463                             | 235546.76                      | 1.63E-28    | ZDHHC23   | 21.5787                            | 9.26066                        | 9.77E-06    | Negative                 |
| gga-miR-19b     | 246119.3                           | 249258.5                       | 5.42E-46    | ZDHHC23   | 21.5787                            | 9.26066                        | 9.77E-06    | Negative                 |
| gga-miR-1712-3p | 23.56                              | 61.18                          | 4.80E-05    | PTPN13    | 16.9784                            | 8.02404                        | 1.98E-05    | Negative                 |
| gga-miR-183     | 4252.58                            | 4619.01                        | 5.56E-07    | TTC7B     | 14.887                             | 7.66349                        | 0.0265443   | Negative                 |
| gga-miR-194     | 176.7                              | 412.96                         | 9.89E-24    | TTC7B     | 14.887                             | 7.66349                        | 0.0265443   | Negative                 |
| gga-miR-34a     | 3115.81                            | 3785.45                        | 1.13E-19    | GPR64     | 18.6512                            | 6.77161                        | 9.47E-05    | Negative                 |
| gga-miR-144     | 33785.01                           | 56537.03                       | 0           | GPR64     | 18.6512                            | 6.77161                        | 9.47E-05    | Negative                 |
| gga-miR-19b     | 246119.3                           | 249258.5                       | 5.42E-46    | ANO1      | 14.7669                            | 6.73814                        | 0.00836706  | Negative                 |
| gga-miR-19a     | 234463                             | 235546.76                      | 1.63E-28    | ANO1      | 14.7669                            | 6.73814                        | 0.00836706  | Negative                 |
| gga-miR-1626-5p | 0                                  | 15.29                          | 0.000124084 | ANO1      | 14.7669                            | 6.73814                        | 0.00836706  | Negative                 |
| gga-miR-215     | 4894.59                            | 6546.15                        | 1.07E-63    | MYOF      | 13.0386                            | 6.61211                        | 0.00106217  | Negative                 |
| gga-miR-133c    | 15690.94                           | 16984.82                       | 1.41E-21    | MYOF      | 13.0386                            | 6.61211                        | 0.00106217  | Negative                 |
| gga-miR-133a    | 17092.76                           | 18384.29                       | 9.06E-21    | MYOF      | 13.0386                            | 6.61211                        | 0.00106217  | Negative                 |
| gga-miR-34a     | 3115.81                            | 3785.45                        | 1.13E-19    | MYOF      | 13.0386                            | 6.61211                        | 0.00106217  | Negative                 |
| gga-miR-20b     | 20880.03                           | 23599.8                        | 7.61E-56    | MYOF      | 13.0386                            | 6.61211                        | 0.00106217  | Negative                 |
| gga-miR-144     | 33785.01                           | 56537.03                       | 0           | SEMA3E    | 13.1018                            | 3.00007                        | 7.69E-07    | Negative                 |
| gga-miR-215     | 4894.59                            | 6546.15                        | 1.07E-63    | SEMA3E    | 13.1018                            | 3.00007                        | 7.69E-07    | Negative                 |
| gga-miR-34a     | 3115.81                            | 3785.45                        | 1.13E-19    | MORC2     | 33.9424                            | 0                              | 5.32E-23    | Negative                 |
| gga-miR-9-3p    | 117.8                              | 565.91                         | 9.06E-73    | LL        | 11.4608                            | 0                              | 0.000322686 | Negative                 |
| gga-miR-15a     | 179756.73                          | 178313.82                      | 6.85E-09    | ANG       | 444.106                            | 995.964                        | 1.82E-10    | Negative                 |
| gga-miR-23b     | 85858.45                           | 79938                          | 3.88E-18    | LAMP1     | 218.668                            | 328.001                        | 0.014471    | Negative                 |
| gga-miR-153     | 20691.55                           | 18376.64                       | 1.46E-18    | LAMP1     | 218.668                            | 328.001                        | 0.014471    | Negative                 |
| gga-miR-218     | 2273.54                            | 1690.07                        | 1.58E-16    | CA2       | 62.5318                            | 314.61                         | 0           | Negative                 |
| gga-miR-23b     | 85858.45                           | 79938                          | 3.88E-18    | CA2       | 62.5318                            | 314.61                         | 0           | Negative                 |
| gga-miR-23b     | 85858.45                           | 79938                          | 3.88E-18    | IRF1      | 187.675                            | 283.533                        | 0.0194019   | Negative                 |
| gga-miR-2964    | 13601.75                           | 134807.91                      | 1.66E-06    | IRF1      | 187.675                            | 283.533                        | 0.0194019   | Negative                 |
| gga-miR-128     | 107498.28                          | 97029.88                       | 1.06E-62    | SAMD13    | 200.057                            | 278.083                        | 0.0451103   | Negative                 |
| gga-miR-23b     | 85858.45                           | 79938                          | 3.88E-18    | SAMD13    | 200.057                            | 278.083                        | 0.0451103   | Negative                 |
| gga-miR-211     | 18812.64                           | 12564.64                       | 7.28E-237   | SAMD13    | 200.057                            | 278.083                        | 0.0451103   | Negative                 |

|                 |            |            |             |           |         |         |             |          |
|-----------------|------------|------------|-------------|-----------|---------|---------|-------------|----------|
| gga-miR-204     | 18812.64   | 12564.64   | 7.28E-237   | SAMD13    | 200.057 | 278.083 | 0.0451103   | Negative |
| gga-miR-24      | 30380.59   | 25641.64   | 5.81E-62    | SAMD13    | 200.057 | 278.083 | 0.0451103   | Negative |
| gga-miR-1782    | 294.5      | 183.54     | 4.48E-06    | LGMN      | 167.438 | 265.765 | 0.0324755   | Negative |
| gga-miR-23b     | 85858.45   | 79938      | 3.88E-18    | CTSL2     | 134.308 | 254.671 | 2.34E-07    | Negative |
| gga-miR-196     | 241.49     | 130.01     | 8.20E-08    | BIRC2     | 147.57  | 247.753 | 8.34E-05    | Negative |
| gga-miR-20a     | 65325.93   | 59511.86   | 5.90E-30    | CXCR4     | 133.009 | 243.903 | 0.000633073 | Negative |
| gga-miR-106     | 65066.77   | 55680.53   | 5.82E-108   | CXCR4     | 133.009 | 243.903 | 0.000633073 | Negative |
| gga-miR-23b     | 85858.45   | 79938      | 3.88E-18    | CXCR4     | 133.009 | 243.903 | 0.000633073 | Negative |
| gga-miR-221     | 154412.09  | 135297.34  | 1.07E-171   | CXCR4     | 133.009 | 243.903 | 0.000633073 | Negative |
| gga-miR-3531    | 29.45      | 0          | 6.47E-08    | H1FO      | 112.572 | 218.292 | 0.00377855  | Negative |
| gga-miR-1655    | 217.93     | 91.77      | 6.84E-12    | PLBD1     | 86.9448 | 153.767 | 0.00199253  | Negative |
| gga-miR-34b     | 589        | 122.36     | 1.15E-70    | RCSDB1    | 100.759 | 153.284 | 0.040992    | Negative |
| gga-miR-429     | 376.96     | 237.07     | 3.06E-07    | LIPA      | 95.946  | 152.17  | 0.0268453   | Negative |
| gga-miR-200b    | 388.74     | 53.53      | 4.43E-61    | LIPA      | 95.946  | 152.17  | 0.0268453   | Negative |
| gga-miR-1655    | 217.93     | 91.77      | 6.84E-12    | LOC417345 | 78.4619 | 133.996 | 0.0115828   | Negative |
| gga-miR-1664-3p | 1030.75    | 451.2      | 2.19E-48    | TXNDC5    | 79.2419 | 128.407 | 0.0159887   | Negative |
| gga-miR-30c     | 419880.02  | 323629.21  | 0           | TXNDC5    | 79.2419 | 128.407 | 0.0159887   | Negative |
| gga-miR-30b     | 89639.82   | 73254.19   | 2.08E-267   | TXNDC5    | 79.2419 | 128.407 | 0.0159887   | Negative |
| gga-miR-2964    | 136011.75  | 134807.91  | 1.66E-06    | TXNDC5    | 79.2419 | 128.407 | 0.0159887   | Negative |
| gga-miR-30d     | 2395549    | 2262888.5  | 1.05E-219   | TXNDC5    | 79.2419 | 128.407 | 0.0159887   | Negative |
| gga-miR-200b    | 388.74     | 53.53      | 4.43E-61    | TXNDC5    | 79.2419 | 128.407 | 0.0159887   | Negative |
| gga-miR-429     | 376.96     | 237.07     | 3.06E-07    | TXNDC5    | 79.2419 | 128.407 | 0.0159887   | Negative |
| gga-miR-2964    | 136011.75  | 134807.91  | 1.66E-06    | GBP7      | 66.3665 | 107.194 | 0.0180635   | Negative |
| gga-miR-223     | 114460.26  | 97374.01   | 2.84E-206   | GBP7      | 66.3665 | 107.194 | 0.0180635   | Negative |
| gga-miR-429     | 376.96     | 237.07     | 3.06E-07    | GBP7      | 66.3665 | 107.194 | 0.0180635   | Negative |
| gga-miR-200b    | 388.74     | 53.53      | 4.43E-61    | GBP7      | 66.3665 | 107.194 | 0.0180635   | Negative |
| gga-miR-33      | 6149.15    | 5070.21    | 1.15E-17    | BNIP3     | 59.8149 | 105.039 | 0.0103493   | Negative |
| gga-miR-15a     | 179756.73  | 178313.82  | 6.85E-09    | BNIP3     | 59.8149 | 105.039 | 0.0103493   | Negative |
| gga-miR-92      | 195547.2   | 1805797.32 | 0           | BNIP3     | 59.8149 | 105.039 | 0.0103493   | Negative |
| gga-miR-26a     | 6688359.39 | 6171874.21 | 0           | BNIP3     | 59.8149 | 105.039 | 0.0103493   | Negative |
| gga-miR-27b     | 229915.92  | 214952.38  | 1.74E-38    | RGS1      | 52.0715 | 96.0099 | 0.00837528  | Negative |
| gga-miR-383     | 1319.36    | 512.37     | 2.03E-76    | NMI       | 56.2541 | 94.0707 | 0.0215854   | Negative |
| gga-miR-15a     | 179756.73  | 178313.82  | 6.85E-09    | NMI       | 56.2541 | 94.0707 | 0.0215854   | Negative |
| gga-miR-34b     | 589        | 122.36     | 1.15E-70    | SLC43A2   | 41.6474 | 91.733  | 6.60E-06    | Negative |
| gga-miR-29b     | 30498.39   | 26528.74   | 1.54E-39    | SLC43A2   | 41.6474 | 91.733  | 6.60E-06    | Negative |
| gga-miR-2964    | 136011.75  | 134807.91  | 1.66E-06    | KPNA2     | 51.9748 | 90.9272 | 0.00403041  | Negative |
| gga-miR-106     | 65066.77   | 55680.53   | 5.82E-108   | KPNA2     | 51.9748 | 90.9272 | 0.00403041  | Negative |
| gga-miR-20a     | 65325.93   | 59511.86   | 5.90E-30    | KPNA2     | 51.9748 | 90.9272 | 0.00403041  | Negative |
| gga-miR-26a     | 6688359.39 | 6171874.21 | 0           | KPNA2     | 51.9748 | 90.9272 | 0.00403041  | Negative |
| gga-miR-23b     | 85858.45   | 79938      | 3.88E-18    | SMCHD1    | 59.2765 | 80.5103 | 0.040992    | Negative |
| gga-miR-2964    | 136011.75  | 134807.91  | 1.66E-06    | SMCHD1    | 59.2765 | 80.5103 | 0.040992    | Negative |
| gga-miR-26a     | 6688359.39 | 6171874.21 | 0           | TUBB1     | 25.7398 | 79.508  | 3.48E-12    | Negative |
| gga-miR-137     | 94.24      | 45.88      | 0.000174111 | SLC6A6    | 50.6603 | 78.9541 | 0.0442082   | Negative |
| gga-miR-460b-5p | 806.93     | 627.08     | 6.04E-05    | MX1       | 9.4955  | 74.9547 | 0           | Negative |
| gga-miR-449c-5p | 106.02     | 30.59      | 3.00E-10    | RNF213    | 30.988  | 70.4357 | 1.51E-05    | Negative |
| gga-miR-449b-5p | 58.9       | 7.65       | 1.83E-10    | RNF213    | 30.988  | 70.4357 | 1.51E-05    | Negative |
| gga-miR-34c     | 589        | 122.36     | 1.15E-70    | RNF213    | 30.988  | 70.4357 | 1.51E-05    | Negative |
| gga-miR-27b     | 229915.92  | 214952.38  | 1.74E-38    | NFE2L2    | 40.7554 | 63.9418 | 0.0194306   | Negative |
| gga-miR-153     | 20691.55   | 18376.64   | 1.46E-18    | NFE2L2    | 40.7554 | 63.9418 | 0.0194306   | Negative |
| gga-miR-26a     | 6688359.39 | 6171874.21 | 0           | ZCCHC11   | 36.7354 | 62.2242 | 0.00521562  | Negative |
| gga-miR-33      | 6149.15    | 5070.21    | 1.15E-17    | ZCCHC11   | 36.7354 | 62.2242 | 0.00521562  | Negative |
| gga-miR-211     | 18812.64   | 12564.64   | 7.28E-237   | ZCCHC11   | 36.7354 | 62.2242 | 0.00521562  | Negative |
| gga-miR-204     | 18812.64   | 12564.64   | 7.28E-237   | ZCCHC11   | 36.7354 | 62.2242 | 0.00521562  | Negative |
| gga-miR-30b     | 89639.82   | 73254.19   | 2.08E-267   | CFH       | 40.0538 | 61.5802 | 0.0449451   | Negative |
| gga-miR-30c     | 419880.02  | 323629.21  | 0           | CFH       | 40.0538 | 61.5802 | 0.0449451   | Negative |
| gga-miR-30d     | 2395549    | 2262888.5  | 1.05E-219   | CFH       | 40.0538 | 61.5802 | 0.0449451   | Negative |
| gga-miR-27b     | 229915.92  | 214952.38  | 1.74E-38    | PLCXD1    | 27.0898 | 61.1129 | 0.000339995 | Negative |
| gga-miR-20a     | 65325.93   | 59511.86   | 5.90E-30    | PLCXD1    | 27.0898 | 61.1129 | 0.000339995 | Negative |
| gga-miR-106     | 65066.77   | 55680.53   | 5.82E-108   | PLCXD1    | 27.0898 | 61.1129 | 0.000339995 | Negative |
| gga-miR-26a     | 6688359.39 | 6171874.21 | 0           | PLCXD1    | 27.0898 | 61.1129 | 0.000339995 | Negative |
| gga-miR-200b    | 388.74     | 53.53      | 4.43E-61    | PLCXD1    | 27.0898 | 61.1129 | 0.000339995 | Negative |
| gga-miR-429     | 376.96     | 237.07     | 3.06E-07    | PLCXD1    | 27.0898 | 61.1129 | 0.000339995 | Negative |
| gga-miR-206     | 17.67      | 0          | 4.23E-05    | PLCXD1    | 27.0898 | 61.1129 | 0.000339995 | Negative |
| gga-miR-218     | 2273.54    | 1690.07    | 1.58E-16    | SAMD9L    | 15.1032 | 61.0749 | 0           | Negative |
| gga-miR-106     | 65066.77   | 55680.53   | 5.82E-108   | SAMD9L    | 15.1032 | 61.0749 | 0           | Negative |
| gga-miR-221     | 154412.09  | 135297.34  | 1.07E-171   | SAMD9L    | 15.1032 | 61.0749 | 0           | Negative |
| gga-miR-20a     | 65325.93   | 59511.86   | 5.90E-30    | SAMD9L    | 15.1032 | 61.0749 | 0           | Negative |
| gga-miR-153     | 20691.55   | 18376.64   | 1.46E-18    | CX3CR1    | 29.6454 | 57.9316 | 0.0233638   | Negative |
| gga-miR-2964    | 136011.75  | 134807.91  | 1.66E-06    | CX3CR1    | 29.6454 | 57.9316 | 0.0233638   | Negative |
| gga-miR-30b     | 89639.82   | 73254.19   | 2.08E-267   | IRF4      | 37.919  | 57.3401 | 0.0488699   | Negative |
| gga-miR-30c     | 419880.02  | 323629.21  | 0           | IRF4      | 37.919  | 57.3401 | 0.0488699   | Negative |
| gga-miR-30d     | 2395549    | 2262888.5  | 1.05E-219   | IRF4      | 37.919  | 57.3401 | 0.0488699   | Negative |
| gga-miR-223     | 114460.26  | 97374.01   | 2.84E-206   | IRF4      | 37.919  | 57.3401 | 0.0488699   | Negative |
| gga-miR-1782    | 294.5      | 183.54     | 4.48E-06    | IRF4      | 37.919  | 57.3401 | 0.0488699   | Negative |
| gga-miR-125b    | 342385.36  | 306407.33  | 1.77E-244   | IRF4      | 37.919  | 57.3401 | 0.0488699   | Negative |
| gga-miR-153     | 20691.55   | 18376.64   | 1.46E-18    | IRF4      | 37.919  | 57.3401 | 0.0488699   | Negative |
| gga-miR-1744-3p | 223.82     | 38.24      | 1.47E-31    | SLBP      | 22.2286 | 55.0994 | 1.66E-05    | Negative |
| gga-miR-1416-5p | 1372.37    | 894.74     | 2.15E-20    | SLBP      | 22.2286 | 55.0994 | 1.66E-05    | Negative |
| gga-miR-196     | 241.49     | 130.01     | 8.20E-08    | SLBP      | 22.2286 | 55.0994 | 1.66E-05    | Negative |
| gga-miR-200a    | 541.88     | 53.53      | 6.11E-98    | SLBP      | 22.2286 | 55.0994 | 1.66E-05    | Negative |
| gga-miR-26a     | 6688359.39 | 6171874.21 | 0           | IFIH1     | 25.6737 | 54.0603 | 0.000119819 | Negative |
| gga-miR-2188    | 151484.76  | 138119.22  | 2.57E-66    | IFIH1     | 25.6737 | 54.0603 | 0.000119819 | Negative |
| gga-miR-34b     | 589        | 122.36     | 1.15E-70    | IFIH1     | 25.6737 | 54.0603 | 0.000119819 | Negative |
| gga-miR-29b     | 30498.39   | 26528.74   | 1.54E-39    | COL6A2    | 27.5564 | 50.7635 | 0.000810331 | Negative |
| gga-miR-125b    | 342385.36  | 306407.33  | 1.77E-244   | TRANK1    | 22.5373 | 50.0981 | 9.02E-07    | Negative |
| gga-miR-206     | 17.67      | 0          | 4.23E-05    | MXRA8     | 27.842  | 48.3847 | 0.0191329   | Negative |
| gga-miR-429     | 376.96     | 237.07     | 3.06E-07    | FN1       | 16.9758 | 47.2428 | 4.30E-12    | Negative |
| gga-miR-200b    | 388.74     | 53.53      | 4.43E-61    | FN1       | 16.9758 | 47.2428 | 4.30E-12    | Negative |
| gga-miR-153     | 20691.55   | 18376.64   | 1.46E-18    | FN1       | 16.9758 | 47.2428 | 4.30E-12    | Negative |
| gga-miR-128     | 107498.28  | 97029.88   | 1.06E-62    | FN1       | 16.9758 | 47.2428 | 4.30E-12    | Negative |
| gga-miR-27b     | 229915.92  | 214952.38  | 1.74E-38    | FN1       | 16.9758 | 47.2428 | 4.30E-12    | Negative |
| gga-miR-29b     | 30498.39   | 26528.74   | 1.54E-39    | ARRDC2    | 25.5533 | 46.8829 | 0.0136235   | Negative |
| gga-miR-24      | 30380.59   | 25641.64   | 5.81E-62    | ARRDC2    | 25.5533 | 46.8829 | 0.0136235   | Negative |
| gga-miR-449b-5p | 58.9       | 7.65       | 1.83E-10    | ARRDC2    | 25.5533 | 46.8829 | 0.0136235   | Negative |
| gga-miR-449c-5p | 106.02     | 30.59      | 3.00E-10    | ARRDC2    | 25.5533 | 46.8829 | 0.0136235   | Negative |



|                 |                          |             |             |           |         |         |             |          |
|-----------------|--------------------------|-------------|-------------|-----------|---------|---------|-------------|----------|
| gga-miR-34c     | 589                      | 122.36      | 1.15E-70    | ARRDC2    | 25.5533 | 46.8829 | 0.0136235   | Negative |
| gga-miR-204     | 18812.64                 | 12564.64    | 7.28E-237   | HEBP1     | 24.5871 | 45.9593 | 0.00219329  | Negative |
| gga-miR-200a    | 541.88                   | 53.53       | 6.11E-98    | HEBP1     | 24.5871 | 45.9593 | 0.00219329  | Negative |
| gga-miR-211     | 18812.64                 | 12564.64    | 7.28E-237   | HEBP1     | 24.5871 | 45.9593 | 0.00219329  | Negative |
| gga-miR-27b     | 229915.92                | 214952.38   | 1.74E-38    | HEBP1     | 24.5871 | 45.9593 | 0.00219329  | Negative |
| gga-miR-34b     | 589                      | 122.36      | 1.15E-70    | HEBP1     | 24.5871 | 45.9593 | 0.00219329  | Negative |
| gga-miR-128     | 107498.28                | 97029.88    | 1.06E-62    | HEBP1     | 24.5871 | 45.9593 | 0.00219329  | Negative |
| gga-miR-200b    | 388.74                   | 53.53       | 4.43E-61    | RGL1      | 30.3201 | 45.761  | 0.0363964   | Negative |
| gga-miR-429     | 376.96                   | 237.07      | 3.06E-07    | RGL1      | 30.3201 | 45.761  | 0.0363964   | Negative |
| gga-miR-148a    | 1334325.18               | 1284575.26  | 1.74E-15    | TXK       | 25.4733 | 44.9575 | 0.0454993   | Negative |
| gga-miR-24      | 30380.59                 | 25641.64    | 5.81E-62    | TXK       | 25.4733 | 44.9575 | 0.0454993   | Negative |
| gga-miR-221     | 154412.09                | 135297.34   | 1.07E-171   | TXK       | 25.4733 | 44.9575 | 0.0454993   | Negative |
| gga-miR-3531    | 29.45                    | 0           | 6.47E-08    | CTLA4     | 17.8859 | 44.5663 | 0.00578906  | Negative |
| gga-miR-429     | 376.96                   | 237.07      | 3.06E-07    | CTLA4     | 17.8859 | 44.5663 | 0.00578906  | Negative |
| gga-miR-200b    | 388.74                   | 53.53       | 4.43E-61    | CTLA4     | 17.8859 | 44.5663 | 0.00578906  | Negative |
| gga-miR-200a    | 541.88                   | 53.53       | 6.11E-98    | IL18R1    | 22.0173 | 44.3116 | 0.00283805  | Negative |
| gga-miR-106     | 65066.77                 | 55680.53    | 5.82E-108   | TSPO2     | 4.49306 | 42.8168 | 5.80E-12    | Negative |
| gga-miR-20a     | 65325.93                 | 59511.86    | 5.90E-30    | TSPO2     | 4.49306 | 42.8168 | 5.80E-12    | Negative |
| gga-miR-1744-3p | 223.82                   | 38.24       | 1.47E-31    | ATP11B    | 0       | 42.341  | 1.68E-30    | Negative |
| gga-miR-221     | 154412.09                | 135297.34   | 1.07E-171   | ATP11B    | 0       | 42.341  | 1.68E-30    | Negative |
| gga-miR-1782    | 294.5                    | 183.54      | 4.48E-06    | EIF2AK2   | 23.2727 | 42.1265 | 0.00496684  | Negative |
| gga-miR-2964    | 136011.75                | 134807.91   | 1.66E-06    | SNX10     | 25.6699 | 41.787  | 0.0348776   | Negative |
| gga-miR-1416-5p | 1372.37                  | 894.74      | 2.15E-20    | SNX10     | 25.6699 | 41.787  | 0.0348776   | Negative |
| gga-miR-128     | 107498.28                | 97029.88    | 1.06E-62    | SNX10     | 25.6699 | 41.787  | 0.0348776   | Negative |
| gga-miR-30d     | 2395549                  | 2262888.5   | 1.05E-219   | SNX10     | 25.6699 | 41.787  | 0.0348776   | Negative |
| gga-miR-30b     | 89639.82                 | 73254.19    | 2.08E-267   | SNX10     | 25.6699 | 41.787  | 0.0348776   | Negative |
| gga-miR-30c     | 419880.02                | 323629.21   | 0           | SNX10     | 25.6699 | 41.787  | 0.0348776   | Negative |
| gga-miR-1655    | 217.93                   | 91.77       | 6.84E-12    | COL6A1    | 17.3967 | 40.0782 | 8.24E-07    | Negative |
| gga-miR-429     | 376.96                   | 237.07      | 3.06E-07    | COL6A1    | 17.3967 | 40.0782 | 8.24E-07    | Negative |
| gga-miR-200b    | 388.74                   | 53.53       | 4.43E-61    | COL6A1    | 17.3967 | 40.0782 | 8.24E-07    | Negative |
| gga-miR-200a    | 541.88                   | 53.53       | 6.11E-98    | SOAT1     | 21.551  | 38.706  | 0.0301956   | Negative |
| gga-miR-1416-5p | 1372.37                  | 894.74      | 2.15E-20    | SOAT1     | 21.551  | 38.706  | 0.0301956   | Negative |
| gga-miR-181b    | 154771.38                | 132460.16   | 5.52E-255   | SOAT1     | 21.551  | 38.706  | 0.0301956   | Negative |
| gga-miR-103     | 189492.89                | 186649.45   | 0.000170965 | CHCHD3    | 0       | 38.0321 | 1.81E-07    | Negative |
| gga-miR-15a     | 179756.73                | 178313.82   | 6.85E-09    | CHCHD3    | 0       | 38.0321 | 1.81E-07    | Negative |
| gga-miR-218     | 2273.54                  | 1690.07     | 1.58E-16    | CHCHD3    | 0       | 38.0321 | 1.81E-07    | Negative |
| gga-miR-499     | 3145.26                  | 1636.54     | 1.48E-97    | CHCHD3    | 0       | 38.0321 | 1.81E-07    | Negative |
| gga-miR-1744-3p | 223.82                   | 38.24       | 1.47E-31    | CHCHD3    | 0       | 38.0321 | 1.81E-07    | Negative |
| gga-miR-200a    | 541.88                   | 53.53       | 6.11E-98    | PLA2R1    | 18.8651 | 37.6376 | 8.34E-05    | Negative |
| gga-miR-29b     | 30498.39                 | 26528.74    | 1.54E-39    | PLA2R1    | 18.8651 | 37.6376 | 8.34E-05    | Negative |
| gga-miR-92      | 1955472.2                | 1805797.32  | 0           | ARRDC3    | 18.2535 | 37.004  | 0.0176332   | Negative |
| gga-miR-148a    | 1334325.18               | 1284575.26  | 1.74E-15    | ARRDC3    | 18.2535 | 37.004  | 0.0176332   | Negative |
| gga-miR-32      | 16079.68                 | 13902.93    | 1.47E-23    | ARRDC3    | 18.2535 | 37.004  | 0.0176332   | Negative |
| gga-miR-365     | 1896.58                  | 1460.65     | 6.00E-11    | ARRDC3    | 18.2535 | 37.004  | 0.0176332   | Negative |
| gga-miR-10b     | 9358782.65               | 8271177.74  | 0           | ARRDC3    | 18.2535 | 37.004  | 0.0176332   | Negative |
| gga-miR-33      | 6149.15                  | 5070.21     | 1.15E-17    | ABCA1     | 18.4027 | 36.868  | 3.26E-06    | Negative |
| gga-miR-3531    | 29.45                    | 0           | 6.47E-08    | SLC7A5    | 18.1089 | 34.863  | 0.000280909 | Negative |
| gga-miR-2964    | 136011.75                | 134807.91   | 1.66E-06    | SGMS1     | 0       | 32.1293 | 2.75E-15    | Negative |
| gga-miR-128     | 107498.28                | 97029.88    | 1.06E-62    | SGMS1     | 0       | 32.1293 | 2.75E-15    | Negative |
| gga-miR-27b     | 229915.92                | 214952.38   | 1.74E-38    | SGMS1     | 0       | 32.1293 | 2.75E-15    | Negative |
| gga-miR-429     | 376.96                   | 237.07      | 3.06E-07    | LAMA5     | 15.5551 | 30.0344 | 0.000119819 | Negative |
| gga-miR-200b    | 388.74                   | 53.53       | 4.43E-61    | LAMA5     | 15.5551 | 30.0344 | 0.000119819 | Negative |
| gga-miR-34c     | 589                      | 122.36      | 1.15E-70    | OCRL      | 0       | 28.6494 | 1.22E-20    | Negative |
| gga-miR-449b-5p | 58.9                     | 7.65        | 1.83E-10    | OCRL      | 0       | 28.6494 | 1.22E-20    | Negative |
| gga-miR-128     | 107498.28                | 97029.88    | 1.06E-62    | OCRL      | 0       | 28.6494 | 1.22E-20    | Negative |
| gga-miR-449c-5p | 106.02                   | 30.59       | 3.00E-10    | OCRL      | 0       | 28.6494 | 1.22E-20    | Negative |
| gga-miR-30b     | 89639.82                 | 73254.19    | 2.08E-267   | OCRL      | 0       | 28.6494 | 1.22E-20    | Negative |
| gga-miR-30c     | 419880.02                | 323629.21   | 0           | OCRL      | 0       | 28.6494 | 1.22E-20    | Negative |
| gga-miR-30d     | 2395549                  | 2262888.5   | 1.05E-219   | OCRL      | 0       | 28.6494 | 1.22E-20    | Negative |
| gga-miR-214     | 43191.33                 | 37778.03    | 2.13E-50    | OCRL      | 0       | 28.6494 | 1.22E-20    | Negative |
| gga-miR-125b    | 342385.36                | 306407.33   | 1.77E-244   | TRANK1    | 8.58333 | 27.8523 | 0.0080009   | Negative |
| gga-miR-218     | 2273.54                  | 1690.07     | 1.58E-16    | TNC       | 17.6498 | 27.1388 | 0.0213684   | Negative |
| gga-miR-126-5p  | 734929.92                | 649284.98   | 0           | TNC       | 17.6498 | 27.1388 | 0.0213684   | Negative |
| gga-miR-1782    | 294.5                    | 183.54      | 4.48E-06    | TNC       | 17.6498 | 27.1388 | 0.0213684   | Negative |
| gga-miR-128     | 107498.28                | 97029.88    | 1.06E-62    | KIAA0319L | 0       | 26.6076 | 1.46E-24    | Negative |
| gga-miR-211     | 18812.64                 | 12564.64    | 7.28E-237   | KIAA0319L | 0       | 26.6076 | 1.46E-24    | Negative |
| gga-miR-204     | 18812.64                 | 12564.64    | 7.28E-237   | KIAA0319L | 0       | 26.6076 | 1.46E-24    | Negative |
| gga-miR-15a     | 179756.73                | 178313.82   | 6.85E-09    | KIAA0319L | 0       | 26.6076 | 1.46E-24    | Negative |
| gga-miR-24      | 30380.59                 | 25641.64    | 5.81E-62    | KIF11     | 15.1507 | 26.21   | 0.0213877   | Negative |
| gga-miR-27b     | 229915.92                | 214952.38   | 1.74E-38    | SLC25A13  | 0       | 25.8201 | 3.49E-22    | Negative |
| gga-miR-128     | 107498.28                | 97029.88    | 1.06E-62    | SLC25A13  | 0       | 25.8201 | 3.49E-22    | Negative |
| gga-miR-106     | 65066.77                 | 55680.53    | 5.82E-108   | SLC25A13  | 0       | 25.8201 | 3.49E-22    | Negative |
| gga-miR-20a     | 65325.93                 | 59511.86    | 5.90E-30    | SLC25A13  | 0       | 25.8201 | 3.49E-22    | Negative |
| gga-miR-27b     | 229915.92                | 214952.38   | 1.74E-38    | PFKFB4    | 10.5021 | 25.4462 | 0.00663609  | Negative |
| gga-miR-196     | 241.49                   | 130.01      | 8.20E-08    | PFKFB4    | 10.5021 | 25.4462 | 0.00663609  | Negative |
| gga-miR-26a     | 6688359.39               | 6171874.21  | 0           | PFKFB4    | 10.5021 | 25.4462 | 0.00663609  | Negative |
| gga-miR-15a     | 179756.73                | 178313.82   | 6.85E-09    | PFKFB4    | 10.5021 | 25.4462 | 0.00663609  | Negative |
| gga-miR-200a    | 541.88                   | 53.53       | 6.11E-98    | TDH       | 7.78765 | 24.1951 | 0.000220576 | Negative |
| gga-miR-30b     | 89639.82                 | 73254.19    | 2.08E-267   | TDH       | 7.78765 | 24.1951 | 0.000220576 | Negative |
| gga-miR-30c     | 419880.02                | 323629.21   | 0           | TDH       | 7.78765 | 24.1951 | 0.000220576 | Negative |
| gga-miR-30d     | 2395549                  | 2262888.5   | 1.05E-219   | TDH       | 7.78765 | 24.1951 | 0.000220576 | Negative |
| gga-miR-10a-5p  | 11492986.72 <sup>a</sup> | 10095802.89 | 0           | TDH       | 7.78765 | 24.1951 | 0.000220576 | Negative |
| gga-miR-10b     | 9358782.65               | 8271177.74  | 0           | TDH       | 7.78765 | 24.1951 | 0.000220576 | Negative |
| gga-miR-3525    | 465.31                   | 298.25      | 4.12E-08    | TDH       | 7.78765 | 24.1951 | 0.000220576 | Negative |
| gga-miR-153     | 20691.55                 | 18376.64    | 1.46E-18    | RIF1      | 16.1349 | 24.1276 | 0.029507    | Negative |
| gga-miR-23b     | 85858.45                 | 79938       | 3.88E-18    | PPP4R1L   | 0       | 22.214  | 3.57E-22    | Negative |
| gga-miR-92      | 1955472.2                | 1805797.32  | 0           | CNST      | 10.652  | 22.0176 | 0.0192507   | Negative |
| gga-miR-32      | 16079.68                 | 13902.93    | 1.47E-23    | CNST      | 10.652  | 22.0176 | 0.0192507   | Negative |
| gga-miR-2964    | 136011.75                | 134807.91   | 1.66E-06    | TPH1      | 4.77094 | 18.5534 | 6.44E-05    | Negative |
| gga-miR-20a     | 65325.93                 | 59511.86    | 5.90E-30    | TPH1      | 4.77094 | 18.5534 | 6.44E-05    | Negative |
| gga-miR-106     | 65066.77                 | 55680.53    | 5.82E-108   | TPH1      | 4.77094 | 18.5534 | 6.44E-05    | Negative |
| gga-miR-148a    | 1334325.18               | 1284575.26  | 1.74E-15    | ATP8A1    | 9.6803  | 17.1941 | 0.040992    | Negative |
| gga-miR-128     | 107498.28                | 97029.88    | 1.06E-62    | ATP8A1    | 9.6803  | 17.1941 | 0.040992    | Negative |
| gga-miR-137     | 94.24                    | 45.88       | 0.000174111 | GSTA3     | 3.96872 | 16.6754 | 0.00149743  | Negative |
| gga-miR-15a     | 179756.73                | 178313.82   | 6.85E-09    | GSTA3     | 3.96872 | 16.6754 | 0.00149743  | Negative |

|                 |            |            |             |           |         |         |             |          |
|-----------------|------------|------------|-------------|-----------|---------|---------|-------------|----------|
| gga-miR-128     | 107498.28  | 97029.88   | 1.06E-62    | LOC769174 | 4.80644 | 15.2419 | 0.0335174   | Negative |
| gga-miR-126-5p  | 734929.92  | 649284.98  | 0           | SLC25A37  | 3.57351 | 14.2619 | 0.0020994   | Negative |
| gga-miR-429     | 376.96     | 237.07     | 3.06E-07    | IL1RL1    | 5.47556 | 13.7486 | 0.0196632   | Negative |
| gga-miR-200b    | 388.74     | 53.53      | 4.43E-61    | IL1RL1    | 5.47556 | 13.7486 | 0.0196632   | Negative |
| gga-miR-23b     | 85858.45   | 79938      | 3.88E-18    | IL1RL1    | 5.47556 | 13.7486 | 0.0196632   | Negative |
| gga-miR-15a     | 179756.73  | 178313.82  | 6.85E-09    | IL1RL1    | 5.47556 | 13.7486 | 0.0196632   | Negative |
| gga-miR-148a    | 1334325.18 | 1284575.26 | 1.74E-15    | ASPM      | 6.68208 | 12.042  | 0.0256369   | Negative |
| gga-miR-223     | 114460.26  | 97374.01   | 2.84E-206   | ASPM      | 6.68208 | 12.042  | 0.0256369   | Negative |
| gga-miR-2964    | 136011.75  | 134807.91  | 1.66E-06    | ASPM      | 6.68208 | 12.042  | 0.0256369   | Negative |
| gga-miR-15a     | 179756.73  | 178313.82  | 6.85E-09    | KANK1     | 4.85366 | 10.5986 | 0.010168    | Negative |
| gga-miR-34b     | 589        | 122.36     | 1.15E-70    | KANK1     | 4.85366 | 10.5986 | 0.010168    | Negative |
| gga-miR-429     | 376.96     | 237.07     | 3.06E-07    | KANK1     | 4.85366 | 10.5986 | 0.010168    | Negative |
| gga-miR-1655    | 217.93     | 91.77      | 6.84E-12    | KANK1     | 4.85366 | 10.5986 | 0.010168    | Negative |
| gga-miR-26a     | 6688359.39 | 6171874.21 | 0           | PKD4      | 1.95445 | 10.1462 | 0.000218755 | Negative |
| gga-miR-449c-5p | 106.02     | 30.59      | 3.00E-10    | PKD4      | 1.95445 | 10.1462 | 0.000218755 | Negative |
| gga-miR-429     | 376.96     | 237.07     | 3.06E-07    | PKD4      | 1.95445 | 10.1462 | 0.000218755 | Negative |
| gga-miR-200b    | 388.74     | 53.53      | 4.43E-61    | PKD4      | 1.95445 | 10.1462 | 0.000218755 | Negative |
| gga-miR-1416-5p | 1372.37    | 894.74     | 2.15E-20    | PKD4      | 1.95445 | 10.1462 | 0.000218755 | Negative |
| gga-miR-34c     | 589        | 122.36     | 1.15E-70    | PKD4      | 1.95445 | 10.1462 | 0.000218755 | Negative |
| gga-miR-181b    | 154771.38  | 132460.16  | 5.52E-255   | PKD4      | 1.95445 | 10.1462 | 0.000218755 | Negative |
| gga-miR-449b-5p | 58.9       | 7.65       | 1.83E-10    | PKD4      | 1.95445 | 10.1462 | 0.000218755 | Negative |
| gga-miR-383     | 1319.36    | 512.37     | 2.03E-76    | RPS27L    | 6308.71 | 3976.31 | 0.0220731   | Postive  |
| gga-miR-200a    | 541.88     | 53.53      | 6.11E-98    | RPS27L    | 6308.71 | 3976.31 | 0.0220731   | Postive  |
| gga-miR-1782    | 294.5      | 183.54     | 0.00000448  | HSP90AA1  | 1016.75 | 616.806 | 0.0125173   | Postive  |
| gga-miR-181b    | 154771.38  | 132460.16  | 5.52E-255   | HSP90AA1  | 1016.75 | 616.806 | 0.0125173   | Postive  |
| gga-miR-1655    | 217.93     | 91.77      | 6.84E-12    | HSP90AA1  | 1016.75 | 616.806 | 0.0125173   | Postive  |
| gga-miR-20a     | 65325.93   | 59511.86   | 5.90E-30    | CKB       | 200.702 | 139.093 | 0.0422742   | Postive  |
| gga-miR-106     | 65066.77   | 55680.53   | 5.82E-108   | CKB       | 200.702 | 139.093 | 0.0422742   | Postive  |
| gga-miR-17-5p   | 90794.26   | 81719.84   | 4.22E-57    | CKB       | 200.702 | 139.093 | 0.0422742   | Postive  |
| gga-miR-92      | 1955472.2  | 1805797.32 | 0           | NAAA      | 269.254 | 139.021 | 5.44E-07    | Postive  |
| gga-miR-30b     | 89639.82   | 73254.19   | 2.08E-267   | CALD1     | 157.1   | 109.112 | 0.0152297   | Postive  |
| gga-miR-30c     | 419880.02  | 323629.21  | 0           | CALD1     | 157.1   | 109.112 | 0.0152297   | Postive  |
| gga-miR-148a    | 1334325.18 | 1284575.26 | 1.74E-15    | MYH11     | 145.901 | 99.5936 | 0.000114137 | Postive  |
| gga-miR-218     | 2273.54    | 1690.07    | 1.58E-16    | MYH11     | 145.901 | 99.5936 | 0.000114137 | Postive  |
| gga-miR-15a     | 179756.73  | 178313.82  | 6.85E-09    | CSRP1     | 147.78  | 94.9176 | 0.0470582   | Postive  |
| gga-miR-27b     | 229915.92  | 214952.38  | 1.74E-38    | SERPINH1  | 139.978 | 87.3562 | 0.0218924   | Postive  |
| gga-miR-214     | 43191.33   | 37778.03   | 2.13E-50    | OLFM2B    | 92.1451 | 56.8475 | 0.0180725   | Postive  |
| gga-miR-211     | 18812.64   | 12564.64   | 7.28E-237   | PTGS2     | 80.0275 | 51.021  | 0.027382    | Postive  |
| gga-miR-204     | 18812.64   | 12564.64   | 7.28E-237   | PTGS2     | 80.0275 | 51.021  | 0.027382    | Postive  |
| gga-miR-32      | 16079.68   | 13902.93   | 1.47E-23    | PTGS2     | 80.0275 | 51.021  | 0.027382    | Postive  |
| gga-miR-30b     | 89639.82   | 73254.19   | 2.08E-267   | DPYSL2    | 69.437  | 45.1659 | 0.020673    | Postive  |
| gga-miR-30c     | 419880.02  | 323629.21  | 0           | DPYSL2    | 69.437  | 45.1659 | 0.020673    | Postive  |
| gga-miR-30d     | 2395549    | 2262888.5  | 1.05E-219   | DPYSL2    | 69.437  | 45.1659 | 0.020673    | Postive  |
| gga-miR-211     | 18812.64   | 12564.64   | 7.28E-237   | RERGL     | 102.728 | 43.9204 | 0.00152603  | Postive  |
| gga-miR-204     | 18812.64   | 12564.64   | 7.28E-237   | RERGL     | 102.728 | 43.9204 | 0.00152603  | Postive  |
| gga-miR-200b    | 388.74     | 53.53      | 4.43E-61    | COL21A1   | 77.6023 | 40.2982 | 0.000154369 | Postive  |
| gga-miR-429     | 376.96     | 237.07     | 3.06E-07    | COL21A1   | 77.6023 | 40.2982 | 0.000154369 | Postive  |
| gga-miR-1306    | 371.07     | 267.66     | 0.000422017 | COL21A1   | 77.6023 | 40.2982 | 0.000154369 | Postive  |
| gga-miR-1729-5p | 3687.14    | 3280.72    | 0.000504673 | COL21A1   | 77.6023 | 40.2982 | 0.000154369 | Postive  |
| gga-miR-92      | 1955472.2  | 1805797.32 | 0           | COL1A2    | 60.9794 | 37.0589 | 0.000583141 | Postive  |
| gga-miR-32      | 16079.68   | 13902.93   | 1.47E-23    | COL1A2    | 60.9794 | 37.0589 | 0.000583141 | Postive  |
| gga-let-7b      | 219225.59  | 155761.71  | 0           | COL1A2    | 60.9794 | 37.0589 | 0.000583141 | Postive  |
| gga-let-7c      | 1206765.58 | 888120.11  | 0           | COL1A2    | 60.9794 | 37.0589 | 0.000583141 | Postive  |
| gga-let-7f      | 2489453.18 | 2100290.04 | 0           | COL1A2    | 60.9794 | 37.0589 | 0.000583141 | Postive  |
| gga-let-7j      | 2472908.19 | 2066848.07 | 0           | COL1A2    | 60.9794 | 37.0589 | 0.000583141 | Postive  |
| gga-let-7g      | 415491.97  | 344797.14  | 0           | COL1A2    | 60.9794 | 37.0589 | 0.000583141 | Postive  |
| gga-miR-26a     | 6688359.39 | 6171874.21 | 0           | COL1A2    | 60.9794 | 37.0589 | 0.000583141 | Postive  |
| gga-miR-206     | 17.67      | 0          | 4.23E-05    | THBS1     | 71.0634 | 36.227  | 7.06E-05    | Postive  |
| gga-miR-32      | 16079.68   | 13902.93   | 1.47E-23    | NGFR      | 92.3428 | 30.1858 | 0.000261887 | Postive  |
| gga-miR-92      | 1955472.2  | 1805797.32 | 0           | NGFR      | 92.3428 | 30.1858 | 0.000261887 | Postive  |
| gga-miR-137     | 94.24      | 45.88      | 0.000174111 | CNRIP1    | 56.1778 | 29.0769 | 0.0451103   | Postive  |
| gga-miR-200a    | 541.88     | 53.53      | 6.11E-98    | CNRIP1    | 56.1778 | 29.0769 | 0.0451103   | Postive  |
| gga-miR-429     | 376.96     | 237.07     | 3.06E-07    | ATP1B4    | 49.2532 | 24.085  | 0.00184808  | Postive  |
| gga-miR-200b    | 388.74     | 53.53      | 4.43E-61    | ATP1B4    | 49.2532 | 24.085  | 0.00184808  | Postive  |
| gga-miR-153     | 20691.55   | 18376.64   | 1.46E-18    | EDN3      | 51.7529 | 21.1925 | 0.00273177  | Postive  |
| gga-miR-1744-3p | 223.82     | 38.24      | 1.47E-31    | EDN3      | 51.7529 | 21.1925 | 0.00273177  | Postive  |
| gga-miR-27b     | 229915.92  | 214952.38  | 1.74E-38    | LAMA4     | 31.0764 | 18.3277 | 0.0072436   | Postive  |
| gga-miR-499     | 3145.26    | 1636.54    | 1.48E-97    | LAMA4     | 31.0764 | 18.3277 | 0.0072436   | Postive  |
| gga-miR-30d     | 2395549    | 2262888.5  | 1.05E-219   | LAMA4     | 31.0764 | 18.3277 | 0.0072436   | Postive  |
| gga-miR-30b     | 89639.82   | 73254.19   | 2.08E-267   | LAMA4     | 31.0764 | 18.3277 | 0.0072436   | Postive  |
| gga-miR-30c     | 419880.02  | 323629.21  | 0           | LAMA4     | 31.0764 | 18.3277 | 0.0072436   | Postive  |
| gga-miR-206     | 17.67      | 0          | 4.23E-05    | LAMA4     | 31.0764 | 18.3277 | 0.0072436   | Postive  |
| gga-miR-211     | 18812.64   | 12564.64   | 7.28E-237   | LAMA4     | 31.0764 | 18.3277 | 0.0072436   | Postive  |
| gga-miR-218     | 2273.54    | 1690.07    | 1.58E-16    | DAB1      | 28.7618 | 16.1637 | 0.0087455   | Postive  |
| gga-miR-15a     | 179756.73  | 178313.82  | 6.85E-09    | DAB1      | 28.7618 | 16.1637 | 0.0087455   | Postive  |
| gga-miR-221     | 154412.09  | 135297.34  | 1.07E-171   | DAB1      | 28.7618 | 16.1637 | 0.0087455   | Postive  |
| gga-miR-26a     | 6688359.39 | 6171874.21 | 0           | COL22A1   | 33.0758 | 14.9105 | 5.32E-06    | Postive  |
| gga-miR-126-5p  | 734929.92  | 649284.98  | 0           | COL22A1   | 33.0758 | 14.9105 | 5.32E-06    | Postive  |
| gga-miR-15a     | 179756.73  | 178313.82  | 6.85E-09    | PKDCC     | 32.4038 | 14.8473 | 0.0140127   | Postive  |
| gga-miR-2130    | 29.45      | 7.65       | 0.000695053 | PKDCC     | 32.4038 | 14.8473 | 0.0140127   | Postive  |
| gga-miR-2964    | 136011.75  | 134807.91  | 1.66E-06    | PKDCC     | 32.4038 | 14.8473 | 0.0140127   | Postive  |
| gga-miR-92      | 1955472.2  | 1805797.32 | 0           | NPNT      | 25.4981 | 10.4204 | 0.00199284  | Postive  |
| gga-miR-32      | 16079.68   | 13902.93   | 1.47E-23    | NPNT      | 25.4981 | 10.4204 | 0.00199284  | Postive  |
| gga-miR-29b     | 30498.39   | 26528.74   | 1.54E-39    | ZDHHC23   | 21.5787 | 9.26066 | 9.77E-06    | Postive  |
| gga-miR-126-5p  | 734929.92  | 649284.98  | 0           | ZDHHC23   | 21.5787 | 9.26066 | 9.77E-06    | Postive  |
| gga-miR-148a    | 1334325.18 | 1284575.26 | 1.74E-15    | ZDHHC23   | 21.5787 | 9.26066 | 9.77E-06    | Postive  |
| gga-miR-200b    | 388.74     | 53.53      | 4.43E-61    | PTPN13    | 16.9784 | 8.02404 | 1.98E-05    | Postive  |
| gga-miR-429     | 376.96     | 237.07     | 3.06E-07    | PTPN13    | 16.9784 | 8.02404 | 1.98E-05    | Postive  |
| gga-miR-23b     | 85858.45   | 79938      | 3.88E-18    | TTC7B     | 14.887  | 7.66349 | 0.0265443   | Postive  |
| gga-miR-27b     | 229915.92  | 214952.38  | 1.74E-38    | TTC7B     | 14.887  | 7.66349 | 0.0265443   | Postive  |
| gga-miR-206     | 17.67      | 0          | 4.23E-05    | TTC7B     | 14.887  | 7.66349 | 0.0265443   | Postive  |
| gga-miR-148a    | 1334325.18 | 1284575.26 | 1.74E-15    | RXFP1     | 17.4894 | 6.82476 | 0.000914608 | Postive  |
| gga-miR-23b     | 85858.45   | 79938      | 3.88E-18    | GPR64     | 18.6512 | 6.77161 | 9.47E-05    | Postive  |
| gga-miR-2964    | 136011.75  | 134807.91  | 1.66E-06    | GPR64     | 18.6512 | 6.77161 | 9.47E-05    | Postive  |
| gga-miR-449c-5p | 106.02     | 30.59      | 3.00E-10    | GPR64     | 18.6512 | 6.77161 | 9.47E-05    | Postive  |

|                 |            |            |             |           |         |         |             |         |
|-----------------|------------|------------|-------------|-----------|---------|---------|-------------|---------|
| gga-miR-34c     | 589        | 122.36     | 1.15E-70    | GPR64     | 18.6512 | 6.77161 | 9.47E-05    | Postive |
| gga-miR-196     | 241.49     | 130.01     | 8.20E-08    | ANO1      | 14.7669 | 6.73814 | 0.00836706  | Postive |
| gga-miR-200a    | 541.88     | 53.53      | 6.11E-98    | GP6B      | 16.9083 | 6.64639 | 0.0143089   | Postive |
| gga-miR-34c     | 589        | 122.36     | 1.15E-70    | MYOF      | 13.0386 | 6.61211 | 0.00106217  | Postive |
| gga-miR-449b-5p | 58.9       | 7.65       | 1.83E-10    | MYOF      | 13.0386 | 6.61211 | 0.00106217  | Postive |
| gga-miR-20a     | 65325.93   | 59511.86   | 5.90E-30    | MYOF      | 13.0386 | 6.61211 | 0.00106217  | Postive |
| gga-miR-106     | 65066.77   | 55680.53   | 5.82E-108   | MYOF      | 13.0386 | 6.61211 | 0.00106217  | Postive |
| gga-miR-92      | 1955472.2  | 1805797.32 | 0           | MYOF      | 13.0386 | 6.61211 | 0.00106217  | Postive |
| gga-miR-1744-3p | 223.82     | 38.24      | 1.47E-31    | CCDC48    | 14.7045 | 5.57979 | 0.0251733   | Postive |
| gga-miR-218     | 2273.54    | 1690.07    | 1.58E-16    | CTNNA2    | 13.1785 | 4.97915 | 0.00190025  | Postive |
| gga-miR-181b    | 154771.38  | 132460.16  | 5.52E-255   | TSPAN8    | 13.7763 | 3.33289 | 0.00136607  | Postive |
| gga-miR-181a-5p | 3651195.65 | 3273091.29 | 0           | TSPAN8    | 13.7763 | 3.33289 | 0.00136607  | Postive |
| gga-miR-23b     | 85858.45   | 79938      | 3.88E-18    | TSPAN8    | 13.7763 | 3.33289 | 0.00136607  | Postive |
| gga-miR-103     | 189492.89  | 186649.45  | 0.000170965 | SEMA3E    | 13.1018 | 3.00007 | 7.69E-07    | Postive |
| gga-miR-499     | 3145.26    | 1636.54    | 1.48E-97    | SEMA3E    | 13.1018 | 3.00007 | 7.69E-07    | Postive |
| gga-miR-218     | 2273.54    | 1690.07    | 1.58E-16    | SEMA3E    | 13.1018 | 3.00007 | 7.69E-07    | Postive |
| gga-miR-153     | 20691.55   | 18376.64   | 1.46E-18    | ROCK1     | 69.1777 | 0       | 2.67E-24    | Postive |
| gga-miR-33      | 6149.15    | 5070.21    | 1.15E-17    | ROCK1     | 69.1777 | 0       | 2.67E-24    | Postive |
| gga-miR-449b-5p | 58.9       | 7.65       | 1.83E-10    | MORC2     | 33.9424 | 0       | 5.32E-23    | Postive |
| gga-miR-449c-5p | 106.02     | 30.59      | 3.00E-10    | MORC2     | 33.9424 | 0       | 5.32E-23    | Postive |
| gga-miR-34c     | 589        | 122.36     | 1.15E-70    | MORC2     | 33.9424 | 0       | 5.32E-23    | Postive |
| gga-miR-429     | 376.96     | 237.07     | 3.06E-07    | HEATR3    | 22.1763 | 0       | 2.63E-16    | Postive |
| gga-miR-15b     | 159029.84  | 161443.71  | 1.32E-33    | ANG       | 444.106 | 995.964 | 1.82E-10    | Postive |
| gga-miR-146a    | 290082.22  | 342862.36  | 0           | STAT1     | 204.763 | 424.888 | 3.26E-06    | Postive |
| gga-miR-146c-5p | 1645422.9  | 2124455.74 | 0           | STAT1     | 204.763 | 424.888 | 3.26E-06    | Postive |
| gga-miR-1458    | 29.45      | 68.83      | 8.01E-05    | CA2       | 62.5318 | 314.61  | 0           | Postive |
| gga-miR-454-3p  | 25474.23   | 26024.01   | 6.52E-08    | IRF1      | 187.675 | 283.533 | 0.0194019   | Postive |
| gga-miR-194     | 176.7      | 412.96     | 9.89E-24    | SAMD13    | 200.057 | 278.083 | 0.0451103   | Postive |
| gga-miR-1329-5p | 371.07     | 619.44     | 2.15E-16    | SAMD13    | 200.057 | 278.083 | 0.0451103   | Postive |
| gga-miR-1563    | 624.34     | 963.57     | 3.80E-19    | SAMD13    | 200.057 | 278.083 | 0.0451103   | Postive |
| gga-miR-144     | 33785.01   | 56537.03   | 0           | SAMD13    | 200.057 | 278.083 | 0.0451103   | Postive |
| gga-miR-1699    | 0          | 15.29      | 0.000124084 | BIRC2     | 147.57  | 247.753 | 8.34E-05    | Postive |
| gga-miR-199-5p  | 148180.47  | 169687.58  | 0           | CXCR4     | 133.009 | 243.903 | 0.000633073 | Postive |
| gga-miR-20b     | 20880.03   | 23599.8    | 7.61E-56    | CXCR4     | 133.009 | 243.903 | 0.000633073 | Postive |
| gga-miR-1756a   | 259.16     | 382.37     | 5.07E-07    | CXCR4     | 133.009 | 243.903 | 0.000633073 | Postive |
| gga-miR-194     | 176.7      | 412.96     | 9.89E-24    | CXCR4     | 133.009 | 243.903 | 0.000633073 | Postive |
| gga-miR-1626-5p | 0          | 15.29      | 0.000124084 | PLBD1     | 86.9448 | 153.767 | 0.00199253  | Postive |
| gga-miR-19b     | 246119.3   | 249258.5   | 5.42E-46    | LIPA      | 95.946  | 152.17  | 0.0268453   | Postive |
| gga-miR-19a     | 234463     | 235546.76  | 1.63E-28    | LIPA      | 95.946  | 152.17  | 0.0268453   | Postive |
| gga-miR-1452    | 0          | 22.94      | 1.53E-06    | LIPA      | 95.946  | 152.17  | 0.0268453   | Postive |
| gga-miR-454-3p  | 25474.23   | 26024.01   | 6.52E-08    | LIPA      | 95.946  | 152.17  | 0.0268453   | Postive |
| gga-miR-138     | 530.1      | 650.03     | 0.000170237 | LOC417345 | 78.4619 | 133.996 | 0.0115828   | Postive |
| gga-miR-30c     | 2745756.28 | 2781204.55 | 0           | TXNDC5    | 79.2419 | 128.407 | 0.0159887   | Postive |
| gga-miR-1458    | 29.45      | 68.83      | 8.01E-05    | TXNDC5    | 79.2419 | 128.407 | 0.0159887   | Postive |
| gga-miR-1699    | 0          | 15.29      | 0.000124084 | AK2       | 63.2963 | 108.723 | 0.0141272   | Postive |
| gga-miR-19a     | 234463     | 235546.76  | 1.63E-28    | GBP7      | 66.3665 | 107.194 | 0.0180635   | Postive |
| gga-miR-19b     | 246119.3   | 249258.5   | 5.42E-46    | GBP7      | 66.3665 | 107.194 | 0.0180635   | Postive |
| gga-miR-9-3p    | 117.8      | 565.91     | 9.06E-73    | BNIP3     | 59.8149 | 105.039 | 0.0103493   | Postive |
| gga-miR-15b     | 159029.84  | 161443.71  | 1.32E-33    | BNIP3     | 59.8149 | 105.039 | 0.0103493   | Postive |
| gga-miR-16      | 229821.69  | 230208.89  | 2.43E-23    | BNIP3     | 59.8149 | 105.039 | 0.0103493   | Postive |
| gga-miR-1626-5p | 0          | 15.29      | 0.000124084 | CD4       | 55.0231 | 98.3413 | 0.00103327  | Postive |
| gga-miR-194     | 176.7      | 412.96     | 9.89E-24    | RGSI      | 52.0715 | 96.0099 | 0.00837528  | Postive |
| gga-miR-21      | 2604101.92 | 4456262.37 | 0           | RGSI      | 52.0715 | 96.0099 | 0.00837528  | Postive |
| gga-miR-15b     | 159029.84  | 161443.71  | 1.32E-33    | NMI       | 56.2541 | 94.0707 | 0.0215854   | Postive |
| gga-miR-142-5p  | 3575096.92 | 3622805.69 | 0           | FAS       | 60.1003 | 92.4175 | 0.0276367   | Postive |
| gga-miR-490     | 907.06     | 1124.16    | 1.54E-07    | SLC43A2   | 41.6474 | 91.733  | 6.60E-06    | Postive |
| gga-miR-18a     | 9088.26    | 9444.51    | 1.63E-05    | SLC43A2   | 41.6474 | 91.733  | 6.60E-06    | Postive |
| gga-miR-18b     | 8446.25    | 8832.72    | 4.71E-06    | SLC43A2   | 41.6474 | 91.733  | 6.60E-06    | Postive |
| gga-miR-20b     | 20880.03   | 23599.8    | 7.61E-56    | KPNA2     | 51.9748 | 90.9272 | 0.00403041  | Postive |
| gga-miR-1769-3p | 965.96     | 1537.12    | 2.70E-33    | LYG2      | 12.4333 | 81.3108 | 8.63E-12    | Postive |
| gga-miR-490     | 907.06     | 1124.16    | 1.54E-07    | SLC6A6    | 50.6603 | 78.9541 | 0.0442082   | Postive |
| gga-miR-454-3p  | 25474.23   | 26024.01   | 6.52E-08    | SLC6A6    | 50.6603 | 78.9541 | 0.0442082   | Postive |
| gga-miR-130c-3p | 99411.32   | 101679.48  | 3.40E-29    | SLC6A6    | 50.6603 | 78.9541 | 0.0442082   | Postive |
| gga-miR-130a    | 91129.99   | 93596.21   | 2.70E-31    | SLC6A6    | 50.6603 | 78.9541 | 0.0442082   | Postive |
| gga-miR-19b     | 246119.3   | 249258.5   | 5.42E-46    | SLC6A6    | 50.6603 | 78.9541 | 0.0442082   | Postive |
| gga-miR-19a     | 234463     | 235546.76  | 1.63E-28    | SLC6A6    | 50.6603 | 78.9541 | 0.0442082   | Postive |
| gga-miR-18a     | 9088.26    | 9444.51    | 1.63E-05    | SLC6A6    | 50.6603 | 78.9541 | 0.0442082   | Postive |
| gga-miR-18b     | 8446.25    | 8832.72    | 4.71E-06    | SLC6A6    | 50.6603 | 78.9541 | 0.0442082   | Postive |
| gga-miR-155     | 121828.64  | 168379.88  | 0           | MX1       | 9.4955  | 74.9547 | 0           | Postive |
| gga-miR-34a     | 3115.81    | 3785.45    | 1.13E-19    | RNF213    | 30.988  | 70.4357 | 1.51E-05    | Postive |
| gga-miR-3536    | 58.9       | 152.95     | 4.53E-11    | NFE2L2    | 40.7554 | 63.9418 | 0.0194306   | Postive |
| gga-miR-1563    | 624.34     | 963.57     | 3.80E-19    | ZCCHC11   | 36.7354 | 62.2242 | 0.00521562  | Postive |
| gga-miR-144     | 33785.01   | 56537.03   | 0           | ZCCHC11   | 36.7354 | 62.2242 | 0.00521562  | Postive |
| gga-miR-30e     | 2745756.28 | 2781204.55 | 0           | CFH       | 40.0538 | 61.5802 | 0.0449451   | Postive |
| gga-miR-20b     | 20880.03   | 23599.8    | 7.61E-56    | PLCXD1    | 27.0898 | 61.1129 | 0.000339995 | Postive |
| gga-miR-133b    | 15514.24   | 16694.22   | 3.94E-19    | PLCXD1    | 27.0898 | 61.1129 | 0.000339995 | Postive |
| gga-miR-133a    | 17092.76   | 18384.29   | 9.06E-21    | PLCXD1    | 27.0898 | 61.1129 | 0.000339995 | Postive |
| gga-miR-133c    | 15690.94   | 16984.82   | 1.41E-21    | PLCXD1    | 27.0898 | 61.1129 | 0.000339995 | Postive |
| gga-miR-155     | 121828.64  | 168379.88  | 0           | CX3CR1    | 29.6454 | 57.9316 | 0.0233638   | Postive |
| gga-miR-30e     | 2745756.28 | 2781204.55 | 0           | IRF4      | 37.919  | 57.3401 | 0.0488699   | Postive |
| gga-miR-144     | 33785.01   | 56537.03   | 0           | IRF4      | 37.919  | 57.3401 | 0.0488699   | Postive |
| gga-miR-194     | 176.7      | 412.96     | 9.89E-24    | IRF4      | 37.919  | 57.3401 | 0.0488699   | Postive |
| gga-miR-199-5p  | 148180.47  | 169687.58  | 0           | IRF4      | 37.919  | 57.3401 | 0.0488699   | Postive |
| gga-miR-1662    | 2621.05    | 3655.44    | 5.93E-45    | SLBP      | 22.2286 | 55.0994 | 1.66E-05    | Postive |
| gga-miR-1712-3p | 23.56      | 61.18      | 4.80E-05    | SLBP      | 22.2286 | 55.0994 | 1.66E-05    | Postive |
| gga-miR-146a    | 290082.22  | 342862.36  | 0           | ZC3HAV1   | 30.5611 | 51.9723 | 0.00521562  | Postive |
| gga-miR-1563    | 624.34     | 963.57     | 3.80E-19    | ZC3HAV1   | 30.5611 | 51.9723 | 0.00521562  | Postive |
| gga-miR-1712-3p | 23.56      | 61.18      | 4.80E-05    | ZC3HAV1   | 30.5611 | 51.9723 | 0.00521562  | Postive |
| gga-miR-146c-5p | 1645422.9  | 2124455.74 | 0           | ZC3HAV1   | 30.5611 | 51.9723 | 0.00521562  | Postive |
| gga-miR-1769-3p | 965.96     | 1537.12    | 2.70E-33    | CX3CL1    | 20.8852 | 51.5959 | 0.0025114   | Postive |
| gga-miR-183     | 4252.58    | 4619.01    | 5.56E-07    | NRP2      | 33.5538 | 51.5064 | 0.0143089   | Postive |
| gga-miR-19b     | 246119.3   | 249258.5   | 5.42E-46    | NRP2      | 33.5538 | 51.5064 | 0.0143089   | Postive |
| gga-miR-19a     | 234463     | 235546.76  | 1.63E-28    | NRP2      | 33.5538 | 51.5064 | 0.0143089   | Postive |
| gga-miR-1668-3p | 53.01      | 114.71     | 1.65E-06    | COL6A2    | 27.5564 | 50.7635 | 0.000810331 | Postive |
| gga-miR-1329-5p | 371.07     | 619.44     | 2.15E-16    | FN1       | 16.9758 | 47.2428 | 4.30E-12    | Postive |

|                 |            |            |             |           |         |         |             |         |
|-----------------|------------|------------|-------------|-----------|---------|---------|-------------|---------|
| gga-miR-144     | 33785.01   | 56537.03   | 0           | FN1       | 16.9758 | 47.2428 | 4.30E-12    | Postive |
| gga-miR-1585    | 0          | 15.29      | 0.000124084 | ARRDC2    | 25.5533 | 46.8829 | 0.0136235   | Postive |
| gga-miR-34a     | 3115.81    | 3785.45    | 1.13E-19    | ARRDC2    | 25.5533 | 46.8829 | 0.0136235   | Postive |
| gga-miR-1699    | 0          | 15.29      | 0.000124084 | HEBP1     | 24.5871 | 45.9593 | 0.00219329  | Postive |
| gga-miR-146c-5p | 1645422.9  | 2124455.74 | 0           | HEBP1     | 24.5871 | 45.9593 | 0.00219329  | Postive |
| gga-miR-146a    | 290082.22  | 342862.36  | 0           | HEBP1     | 24.5871 | 45.9593 | 0.00219329  | Postive |
| gga-miR-19a     | 234463     | 235546.76  | 1.63E-28    | RGL1      | 30.3201 | 45.761  | 0.0363964   | Postive |
| gga-miR-19b     | 246119.3   | 249258.5   | 5.42E-46    | RGL1      | 30.3201 | 45.761  | 0.0363964   | Postive |
| gga-miR-155     | 121828.64  | 168379.88  | 0           | RGL1      | 30.3201 | 45.761  | 0.0363964   | Postive |
| gga-miR-21      | 2604101.92 | 4456262.37 | 0           | TXK       | 25.4733 | 44.9575 | 0.0454993   | Postive |
| gga-miR-3535    | 0          | 30.59      | 2.24E-08    | TXK       | 25.4733 | 44.9575 | 0.0454993   | Postive |
| gga-miR-155     | 121828.64  | 168379.88  | 0           | CTLA4     | 17.8859 | 44.5663 | 0.00578906  | Postive |
| gga-miR-138     | 530.1      | 650.03     | 0.000170237 | TPX2      | 25.8939 | 44.2807 | 0.0159887   | Postive |
| gga-miR-1587    | 0          | 15.29      | 0.000124084 | TPX2      | 25.8939 | 44.2807 | 0.0159887   | Postive |
| gga-miR-199-5p  | 148180.47  | 169687.58  | 0           | SNTB1     | 23.4159 | 43.1244 | 7.60E-05    | Postive |
| gga-miR-1756a   | 259.16     | 382.37     | 5.07E-07    | SNTB1     | 23.4159 | 43.1244 | 7.60E-05    | Postive |
| gga-miR-20b     | 20880.03   | 23599.8    | 7.61E-56    | TSPO2     | 4.49306 | 42.8168 | 5.80E-12    | Postive |
| gga-miR-3535    | 0          | 30.59      | 2.24E-08    | SNX10     | 25.6699 | 41.787  | 0.0348776   | Postive |
| gga-miR-30e     | 2745756.28 | 2781204.55 | 0           | SNX10     | 25.6699 | 41.787  | 0.0348776   | Postive |
| gga-miR-190     | 1666.87    | 1934.79    | 3.39E-07    | SNX10     | 25.6699 | 41.787  | 0.0348776   | Postive |
| gga-miR-144     | 33785.01   | 56537.03   | 0           | SOAT1     | 21.551  | 38.706  | 0.0301956   | Postive |
| gga-miR-146a    | 290082.22  | 342862.36  | 0           | TNFRSF18  | 22.0424 | 38.1007 | 0.0156132   | Postive |
| gga-miR-146c-5p | 1645422.9  | 2124455.74 | 0           | TNFRSF18  | 22.0424 | 38.1007 | 0.0156132   | Postive |
| gga-miR-1699    | 0          | 15.29      | 0.000124084 | TNFRSF18  | 22.0424 | 38.1007 | 0.0156132   | Postive |
| gga-miR-15b     | 159029.84  | 161443.71  | 1.32E-33    | CHCHD3    | 0       | 38.0321 | 1.81E-07    | Postive |
| gga-miR-16c     | 28083.49   | 29151.79   | 1.86E-14    | CHCHD3    | 0       | 38.0321 | 1.81E-07    | Postive |
| gga-miR-16      | 229821.69  | 230208.89  | 2.43E-23    | CHCHD3    | 0       | 38.0321 | 1.81E-07    | Postive |
| gga-miR-15c-5p  | 223631.3   | 224458.07  | 8.92E-26    | CHCHD3    | 0       | 38.0321 | 1.81E-07    | Postive |
| gga-miR-155     | 121828.64  | 168379.88  | 0           | PLA2R1    | 18.8651 | 37.6376 | 8.34E-05    | Postive |
| gga-miR-155     | 121828.64  | 168379.88  | 0           | ARRDC3    | 18.2535 | 37.004  | 0.0176332   | Postive |
| gga-miR-19b     | 246119.3   | 249258.5   | 5.42E-46    | ARRDC3    | 18.2535 | 37.004  | 0.0176332   | Postive |
| gga-miR-144     | 33785.01   | 56537.03   | 0           | ARRDC3    | 18.2535 | 37.004  | 0.0176332   | Postive |
| gga-miR-130a    | 91129.99   | 93596.21   | 2.70E-31    | ARRDC3    | 18.2535 | 37.004  | 0.0176332   | Postive |
| gga-miR-130c-3p | 99411.32   | 101679.48  | 3.40E-29    | ARRDC3    | 18.2535 | 37.004  | 0.0176332   | Postive |
| gga-miR-199-5p  | 148180.47  | 169687.58  | 0           | SLC7A5    | 18.1089 | 34.863  | 0.000280909 | Postive |
| gga-miR-147     | 9553.57    | 16342.44   | 0           | SLC7A5    | 18.1089 | 34.863  | 0.000280909 | Postive |
| gga-miR-1458    | 29.45      | 68.83      | 8.01E-05    | SGMS1     | 0       | 32.1293 | 2.75E-15    | Postive |
| gga-miR-3535    | 0          | 30.59      | 2.24E-08    | SGMS1     | 0       | 32.1293 | 2.75E-15    | Postive |
| gga-miR-144     | 33785.01   | 56537.03   | 0           | SGMS1     | 0       | 32.1293 | 2.75E-15    | Postive |
| gga-miR-1769-3p | 965.96     | 1537.12    | 2.70E-33    | SGMS1     | 0       | 32.1293 | 2.75E-15    | Postive |
| gga-miR-9-3p    | 117.8      | 565.91     | 9.06E-73    | GZMA      | 15.9436 | 31.8832 | 0.0340161   | Postive |
| gga-miR-1756a   | 259.16     | 382.37     | 5.07E-07    | LAMA5     | 15.5551 | 30.0344 | 0.000119819 | Postive |
| gga-miR-142-3p  | 470663.55  | 571113.52  | 0           | IL6ST     | 17.0215 | 29.8613 | 0.0273944   | Postive |
| gga-miR-34a     | 3115.81    | 3785.45    | 1.13E-19    | OCRL      | 0       | 28.6494 | 1.22E-20    | Postive |
| gga-miR-21      | 2604101.92 | 4456262.37 | 0           | OCRL      | 0       | 28.6494 | 1.22E-20    | Postive |
| gga-miR-30e     | 2745756.28 | 2781204.55 | 0           | OCRL      | 0       | 28.6494 | 1.22E-20    | Postive |
| gga-miR-19b     | 246119.3   | 249258.5   | 5.42E-46    | OCRL      | 0       | 28.6494 | 1.22E-20    | Postive |
| gga-miR-19a     | 234463     | 235546.76  | 1.63E-28    | OCRL      | 0       | 28.6494 | 1.22E-20    | Postive |
| gga-miR-130c-3p | 99411.32   | 101679.48  | 3.40E-29    | OCRL      | 0       | 28.6494 | 1.22E-20    | Postive |
| gga-miR-21      | 2604101.92 | 4456262.37 | 0           | TNC       | 17.6498 | 27.1388 | 0.0213684   | Postive |
| gga-miR-16      | 229821.69  | 230208.89  | 2.43E-23    | KIAA0319L | 0       | 26.6076 | 1.46E-24    | Postive |
| gga-miR-16c     | 28083.49   | 29151.79   | 1.86E-14    | KIAA0319L | 0       | 26.6076 | 1.46E-24    | Postive |
| gga-miR-15b     | 159029.84  | 161443.71  | 1.32E-33    | KIAA0319L | 0       | 26.6076 | 1.46E-24    | Postive |
| gga-miR-1329-5p | 371.07     | 619.44     | 2.15E-16    | KIF11     | 15.1507 | 26.21   | 0.0213877   | Postive |
| gga-miR-146c-5p | 1645422.9  | 2124455.74 | 0           | KIF11     | 15.1507 | 26.21   | 0.0213877   | Postive |
| gga-miR-146a    | 290082.22  | 342862.36  | 0           | KIF11     | 15.1507 | 26.21   | 0.0213877   | Postive |
| gga-miR-1329-5p | 371.07     | 619.44     | 2.15E-16    | SLC25A13  | 0       | 25.8201 | 3.49E-22    | Postive |
| gga-miR-133c    | 15690.94   | 16984.82   | 1.41E-21    | SLC25A13  | 0       | 25.8201 | 3.49E-22    | Postive |
| gga-miR-133a    | 17092.76   | 18384.29   | 9.06E-21    | SLC25A13  | 0       | 25.8201 | 3.49E-22    | Postive |
| gga-miR-133b    | 15514.24   | 16694.22   | 3.94E-19    | SLC25A13  | 0       | 25.8201 | 3.49E-22    | Postive |
| gga-miR-20b     | 20880.03   | 23599.8    | 7.61E-56    | SLC25A13  | 0       | 25.8201 | 3.49E-22    | Postive |
| gga-miR-16      | 229821.69  | 230208.89  | 2.43E-23    | PFKFB4    | 10.5021 | 25.4462 | 0.00663609  | Postive |
| gga-miR-15b     | 159029.84  | 161443.71  | 1.32E-33    | PFKFB4    | 10.5021 | 25.4462 | 0.00663609  | Postive |
| gga-miR-144     | 33785.01   | 56537.03   | 0           | TDH       | 7.78765 | 24.1951 | 0.000220576 | Postive |
| gga-miR-30e     | 2745756.28 | 2781204.55 | 0           | TDH       | 7.78765 | 24.1951 | 0.000220576 | Postive |
| gga-miR-1756a   | 259.16     | 382.37     | 5.07E-07    | FAM82A2   | 0       | 20.277  | 2.38E-11    | Postive |
| gga-miR-3536    | 58.9       | 152.95     | 4.53E-11    | TPH1      | 4.77094 | 18.5534 | 6.44E-05    | Postive |
| gga-miR-20b     | 20880.03   | 23599.8    | 7.61E-56    | TPH1      | 4.77094 | 18.5534 | 6.44E-05    | Postive |
| gga-miR-1563    | 624.34     | 963.57     | 3.80E-19    | GSTA3     | 3.96872 | 16.6754 | 0.00149743  | Postive |
| gga-miR-16c     | 28083.49   | 29151.79   | 1.86E-14    | GSTA3     | 3.96872 | 16.6754 | 0.00149743  | Postive |
| gga-miR-16      | 229821.69  | 230208.89  | 2.43E-23    | GSTA3     | 3.96872 | 16.6754 | 0.00149743  | Postive |
| gga-miR-15b     | 159029.84  | 161443.71  | 1.32E-33    | GSTA3     | 3.96872 | 16.6754 | 0.00149743  | Postive |
| gga-miR-21      | 2604101.92 | 4456262.37 | 0           | GSTA3     | 3.96872 | 16.6754 | 0.00149743  | Postive |
| gga-miR-1674    | 259.16     | 512.37     | 4.29E-21    | SLC25A37  | 3.57351 | 14.2619 | 0.0020994   | Postive |
| gga-miR-1668-3p | 53.01      | 114.71     | 1.65E-06    | SLC25A37  | 3.57351 | 14.2619 | 0.0020994   | Postive |
| gga-miR-1563    | 624.34     | 963.57     | 3.80E-19    | IL1RL1    | 5.47556 | 13.7486 | 0.0196632   | Postive |
| gga-miR-15b     | 159029.84  | 161443.71  | 1.32E-33    | IL1RL1    | 5.47556 | 13.7486 | 0.0196632   | Postive |
| gga-miR-16c     | 28083.49   | 29151.79   | 1.86E-14    | IL1RL1    | 5.47556 | 13.7486 | 0.0196632   | Postive |
| gga-miR-16      | 229821.69  | 230208.89  | 2.43E-23    | IL1RL1    | 5.47556 | 13.7486 | 0.0196632   | Postive |
| gga-miR-1458    | 29.45      | 68.83      | 8.01E-05    | IL1RL1    | 5.47556 | 13.7486 | 0.0196632   | Postive |
| gga-miR-3536    | 58.9       | 152.95     | 4.53E-11    | ASPM      | 6.68208 | 12.042  | 0.0256369   | Postive |
| gga-miR-22-3p   | 2389181.92 | 3014197.09 | 0           | ASPM      | 6.68208 | 12.042  | 0.0256369   | Postive |
| gga-miR-144     | 33785.01   | 56537.03   | 0           | ASPM      | 6.68208 | 12.042  | 0.0256369   | Postive |
| gga-miR-130c-3p | 99411.32   | 101679.48  | 3.40E-29    | ASPM      | 6.68208 | 12.042  | 0.0256369   | Postive |
| gga-miR-130a    | 91129.99   | 93596.21   | 2.70E-31    | ASPM      | 6.68208 | 12.042  | 0.0256369   | Postive |
| gga-miR-454-3p  | 25474.23   | 26024.01   | 6.52E-08    | ASPM      | 6.68208 | 12.042  | 0.0256369   | Postive |
| gga-miR-15b     | 159029.84  | 161443.71  | 1.32E-33    | KANK1     | 4.85366 | 10.5986 | 0.010168    | Postive |
| gga-miR-16      | 229821.69  | 230208.89  | 2.43E-23    | KANK1     | 4.85366 | 10.5986 | 0.010168    | Postive |
| gga-miR-16c     | 28083.49   | 29151.79   | 1.86E-14    | KANK1     | 4.85366 | 10.5986 | 0.010168    | Postive |
| gga-miR-34a     | 3115.81    | 3785.45    | 1.13E-19    | PDK4      | 1.95445 | 10.1462 | 0.000218755 | Postive |

<sup>a</sup>The correlation expression patterns between miRNAs and their targets.

**Table S4. Gene ontology (GO) function annotation of the 111 genes was also performed by STRING.**

| GO_id      | Go Term                                                  | Number of genes | p value  | Type               | Differentially expressed genes                                                                                                                                                    |
|------------|----------------------------------------------------------|-----------------|----------|--------------------|-----------------------------------------------------------------------------------------------------------------------------------------------------------------------------------|
| GO:0006950 | response to stress                                       | 24              | 2.78E-06 | biological_process | IRF1; SGMS1; RSFR; ABCA1; TXNDC5; IRF4; BNIP3; ABCC9; THBS1; PTGS2; TNC; FN1; PLA2R; PDK4; MDK; CXCR4; LIPA; C7; IFIH1; EIF2AK2; NFE2L2; CTLA4; HSP90AA1; RCS1                    |
| GO:0006952 | defense response                                         | 11              | 3.11E-05 | biological_process | IRF1; SGMS1; IRF4; BNIP3; ABCC9; THBS1; FN1; MDK; LIPA; C7; IFIH1                                                                                                                 |
| GO:0045589 | regulation of regulatory T cell differentiation          | 2               | 6.27E-05 | biological_process | IRF1; CTLA4                                                                                                                                                                       |
| GO:0045590 | negative regulation of regulatory T cell differentiation | 2               | 6.27E-05 | biological_process | IRF1; CTLA4                                                                                                                                                                       |
| GO:0046632 | alpha-beta T cell differentiation                        | 4               | 6.62E-05 | biological_process | IRF1; IRF4; TXK; LOC429317                                                                                                                                                        |
| GO:0046631 | alpha-beta T cell activation                             | 4               | 8.76E-05 | biological_process | IRF1; IRF4; TXK; LOC429317                                                                                                                                                        |
| GO:0002252 | immune effector process                                  | 7               | 1.26E-04 | biological_process | IRF1; IRF4; BNIP3; ABCC9; C7; CX3CR1; LOC429317                                                                                                                                   |
| GO:0032369 | negative regulation of lipid transport                   | 3               | 1.32E-04 | biological_process | SREBF2; THBS1; PLA2RA                                                                                                                                                             |
| GO:0051239 | regulation of multicellular organismal process           | 21              | 1.59E-04 | biological_process | IRF1; LOC429317; NGFR; ANKRD15; LAMA4; IRF4; PTGS2; THBS1; DAB1; CXCR4; PDK4; SEMA3E; IL1RL1; EIF2AK2; NFE2L2; TXK; CX3CR1; CTLA4; ARRDC3; EDN3; LGMN                             |
| GO:0048583 | regulation of response to stimulus                       | 26              | 1.79E-04 | biological_process | IRF1; SGMS1; ANKRD15; ABCA; BNIP3; IRF4; LOC429317; NGFR; PTGS2; THBS1; DAB1; CXCR4; MDK; RGS1; IL1RL1; PLA2R1; C7; RGL1; CX3CR1; EIF2AK2; NFE2L2; CTLA4; TXK; ARRDC3; EDN3; OCRL |
| GO:0032368 | regulation of lipid transport                            | 4               | 3.64E-04 | biological_process | SREBF2; THBS1; PLA2RA; ABCA1                                                                                                                                                      |
| GO:0050873 | brown fat cell differentiation                           | 3               | 3.65E-04 | biological_process | LAMA4; BNIP3; PTGS2                                                                                                                                                               |
| GO:0045332 | phospholipid translocation                               | 3               | 4.31E-04 | biological_process | ATP11B; ABCA1; ATP8A1                                                                                                                                                             |
| GO:0009615 | response to virus                                        | 5               | 5.35E-04 | biological_process | IRF1; BNIP3; EIF2AK2; IFIH1; ABCC9                                                                                                                                                |
| GO:0051240 | positive regulation of multicellular organismal process  | 9               | 5.52E-04 | biological_process | IRF1; LOC429317; PTGS2; THBS1; IL1RL1; EIF2AK2; NFE2L2; TXK; EDN3                                                                                                                 |
| GO:0034377 | plasma lipoprotein particle assembly                     | 2               | 6.17E-04 | biological_process | ABCA1; SOAT1                                                                                                                                                                      |
| GO:2000192 | negative regulation of fatty acid transport              | 2               | 6.17E-04 | biological_process | THBS1; PLA2R1                                                                                                                                                                     |
| GO:0034616 | response to laminar fluid shear stress                   | 2               | 6.17E-04 | biological_process | ABCA1; NFE2L2                                                                                                                                                                     |
| GO:0032891 | negative regulation of organic acid transport            | 2               | 6.17E-04 | biological_process | THBS1; PLA2R1                                                                                                                                                                     |
| GO:0061024 | membrane organization                                    | 8               | 6.43E-04 | biological_process | CXCR4; CHCHD3; ATP11B; ABCA1; BNIP3; THBS1; ZDHHC23; ATP8A1                                                                                                                       |
| GO:0051093 | negative regulation of developmental process             | 10              | 7.83E-04 | biological_process | IRF1; RIF1; SEMA3E; DAB1; CX3CR1; CTLA4; NGIR; ANKRD15; BNIP3; THBS1                                                                                                              |
| GO:0050795 | regulation of behavior                                   | 5               | 8.11E-04 | biological_process | EDN3; ARRDC3; CXCR4; MDK; THBS1                                                                                                                                                   |
| GO:0043032 | positive regulation of macrophage activation             | 2               | 9.21E-04 | biological_process | THBS1; IL1RL1                                                                                                                                                                     |
| GO:0055098 | response to low-density lipoprotein particle             | 2               | 9.21E-04 | biological_process | SREBF2; ABCA1                                                                                                                                                                     |
| GO:0031650 | regulation of heat generation                            | 2               | 9.21E-04 | biological_process | PTGS2; ARRDC3                                                                                                                                                                     |
| GO:0097035 | regulation of membrane lipid distribution                | 3               | 9.88E-04 | biological_process | ATP11B; ABCA1; ATP8A1                                                                                                                                                             |
| GO:0010812 | negative regulation of cell-substrate adhesion           | 3               | 9.88E-04 | biological_process | ANKRD15; THBS1; SEMA3E                                                                                                                                                            |

|            |                                                                                                              |   |          |                    |                                            |
|------------|--------------------------------------------------------------------------------------------------------------|---|----------|--------------------|--------------------------------------------|
| GO:0001816 | cytokine production                                                                                          | 4 | 1.00E-03 | biological_process | ABCA1; PLA2R1; TXK; LIPA                   |
| GO:0005604 | basement membrane                                                                                            | 5 | 0.000693 | cellular_component | RSFR; LAMA4; TNC; FN1; MDK                 |
| GO:0044420 | extracellular matrix part                                                                                    | 5 | 0.000262 | cellular_component | RSFR; LAMA4; TNC; FN1; MDK                 |
| GO:0042383 | sarcolemma                                                                                                   | 4 | 0.000279 | cellular_component | COL6A1; COL6A2; ABCC9; LAMP1               |
| GO:0005578 | proteinaceous extracellular matrix                                                                           | 7 | 0.000583 | cellular_component | RSFR; LAMA4; COL6A1; COL6A2; TNC; FN1; MDK |
| GO:0005577 | fibrinogen complex                                                                                           | 2 | 0.000978 | cellular_component | THBS1; FN1                                 |
| GO:0008281 | sulfonylurea receptor activity                                                                               | 2 | 0.000607 | molecular_function | ABCC8; ABCC9                               |
| GO:0005548 | phospholipid transporter activity                                                                            | 3 | 0.000833 | molecular_function | ABCA1; ATP11B; ATP8A1                      |
| GO:0016894 | endonuclease activity, active with either ribo- or deoxyribonucleic acids and producing 3'-phosphomonoesters | 2 | 0.000892 | molecular_function | RSFR; DNASE2B                              |

| <b>Table S5. Primer pairs employed to identify ALVs, MDV and REV.</b> |                     |                                   |                            |                            |
|-----------------------------------------------------------------------|---------------------|-----------------------------------|----------------------------|----------------------------|
| <b>Virus be specific detected</b>                                     | <b>Primer pairs</b> | <b>Primer sequence (5' to 3')</b> | <b>Size of PCR product</b> | <b>Reference</b>           |
| Subgroup J ALV                                                        | H5                  | GGATGAGGTGACTAAGAAAAG             | 545 bp                     | Smith <i>et al.</i> , 1998 |
|                                                                       | H7                  | CGAACCAAAGGTAACACACG              |                            |                            |
| Subgroups A-E ALV                                                     | H5                  | GGATGAGGTGACTAAGAAAAG             | 295-326 <sup>a</sup> bp    | Smith <i>et al.</i> , 1998 |
|                                                                       | AD1                 | GGGAGGTGGCTGACTGTGT               |                            |                            |
| MDV                                                                   | MDV-F               | GCCTTTTATACACAAGAGCCGAG           | 560 bp                     | Ding <i>et al.</i> , 2007  |
|                                                                       | MDV-R               | TTTATCGCGGTTGTGGGTCATG            |                            |                            |
| REV                                                                   | REV-F               | CATACTGGAGCCAATGGTT               | 300 bp                     | Ji <i>et al.</i> , 2001    |
|                                                                       | REV-R               | AATGTTGTAGCGAAGTACT               |                            |                            |

<sup>a</sup>The exact size of PCR product depends on the ALV subgroup.

| <b>Table S6. Real-time PCR primers for IRF1, gp85, IFN<math>\beta</math> and <math>\beta</math>-active.</b> |                     |                                   |                            |
|-------------------------------------------------------------------------------------------------------------|---------------------|-----------------------------------|----------------------------|
| <b>Target gene</b>                                                                                          | <b>Primer pairs</b> | <b>Primer sequence (5' to 3')</b> | <b>Size of PCR product</b> |
| IRF1                                                                                                        | IRF1-F              | GGCAGGAAGTGGAGGTGGAGA             | 132 bp                     |
|                                                                                                             | IRF1-R              | GCTGGTAGATGTCGTTGGTGCT            |                            |
| ALV-J gp85                                                                                                  | gp85-F              | CACCTGGGCAAATAAGA                 | 169 bp                     |
|                                                                                                             | gp85-R              | TTGGCTGGCTAAATCG                  |                            |
| IFN $\beta$                                                                                                 | IFN $\beta$ -F      | CGTCACCAGGATGCCAACT               | 170 bp                     |
|                                                                                                             | IFN $\beta$ -R      | TGGAGGATGCGGAGGGT                 |                            |
| $\beta$ -active                                                                                             | $\beta$ -active-F   | CCCCATGCCATCCTCCGTCTG             | 223 bp                     |
|                                                                                                             | $\beta$ -active-R   | CCTCGGGGCACCTGAACCTCTC            |                            |
